# Supplementary material for: For 481 biomedical open access journals, articles are not searchable in the Directory of Open Access Journals nor in conventional biomedical databases
Source: PeerJ. 2015 May 19;3:e972. doi: 10.7717/peerj.972 (PMC4451041; doi:10.7717/peerj.972)
Supplement: Data S1 [file peerj-03-972-s001.xlsx]

## Sheet: Sheet1
JournalTitleSCOPUS	JournalTitleMEDLINE	JournalTitlePMC	JournalTitleNLM	JournalTitleEMBASE	JournalTitleDOAJ	JournalTitleAbbreviatedJCR	pISSN	eISSN	BiomedicalOAJournal	IndexedInEMBASE	IndexedInSCOPUS	IndexedInMEDLINE	IndexedInPMC	IndexedInNLM	IndexedInDOAJ	IndexedInJCR	JournalLanguage	ImpactFactor
African Journal of Pharmacy and Pharmacology					African Journal of Pharmacy and Pharmacology		19960816		1	0	1	0	0	0	1	0	1
Studium (Rotterdam, Netherlands)			Studium (Rotterdam, Netherlands)		Studium : Tijdschrift voor Wetenschaps- en Universiteits-Geschiedenis		18769055	22127283	1	0	1	0	0	1	1	0	1
Internet Journal of Genomics and Proteomics				Internet Journal of Genomics and Proteomics	The Internet Journal of Genomics and Proteomics		15402630	15402630	1	1	1	0	0	0	1	0	1
Acta orthopaedica. Supplementum	Acta orthopaedica. Supplementum		Acta orthopaedica. Supplementum				17453690	17453704	1	0	1	1	0	1	0	0	1
African Journal of Traditional, Complementary and Alternative Medicines	African journal of traditional, complementary, and alternative medicines : AJTCAM / African Networks on Ethnomedicines	African Journal of Traditional, Complementary, and Alternative Medicines	African journal of traditional, complementary, and alternative medicines : AJTCAM / African Networks on Ethnomedicines	African Journal of Traditional, Complementary and Alternative Medicines		AFR J TRADIT COMPLEM	01896016	01896016	1	1	1	1	1	1	0	1	1	0.518
Annales Universitatis Mariae Curie-Sklodowska - Sectio D. Medicina	Annales Universitatis Mariae Curie-Sk?odowska. Sectio D: Medicina		Annales Universitatis Mariae Curie-Sklodowska. Sectio D: Medicina	Annales Universitatis Mariae Curie-Sk?odowska. Sectio D: Medicina			00662240		0	1	1	1	0	1	0	0	0
Internet Journal of Cardiovascular Research				Internet Journal of Cardiovascular Research			15402592	15402592	1	1	1	0	0	0	0	0	1
Open Gene Therapy Journal			The open gene therapy journal	Open Gene Therapy Journal			18750370	18750370	1	1	1	0	0	1	0	0	1
Open Parasitology Journal			The open parasitology journal	Open Parasitology Journal			18744214	18744214	1	1	1	0	0	1	0	0	1
Open Structural Biology Journal				Open Structural Biology Journal			18741991	18741991	1	1	1	0	0	0	0	0	1
Open Surgical Oncology Journal			Open surgical oncology journal (Online)	Open Surgical Oncology Journal			18765041	18765041	1	1	1	0	0	1	0	0	1
Perspectives in Medicinal Chemistry		Perspectives in Medicinal Chemistry	Perspectives in medicinal chemistry	Perspectives in Medicinal Chemistry			1177391X	1177391X	1	1	1	0	1	1	0	0	1
World Wide Wounds				World Wide Wounds			13692607	13692607	1	1	1	0	0	0	0	0	1
Parasitologia Latinoamericana					ParasitologÃ­a latinoamericana		07177712	07177712	0	0	1	0	0	0	1	0	1
Endocytobiosis and Cell Research					Endocytobiosis and Cell Research		02561514	16138872	1	0	1	0	0	0	1	0	1
Medicina					Medicina		00257729		1	0	1	0	0	0	1	0	1
Global Veterinaria					Global Veterinaria		19926197	19998163	1	0	1	0	0	0	1	0	1
Internet Journal of Advanced Nursing Practice					The Internet Journal of Advanced Nursing Practice		15236064		1	0	1	0	0	0	1	0	1
Internet Journal of Biological Anthropology					The Internet Journal of Biological Anthropology		19394594		1	0	1	0	0	0	1	0	1
Internet Journal of Pain, Symptom Control and Palliative Care					The Internet Journal of Pain, Symptom Control and Palliative Care		15288277		1	0	1	0	0	0	1	0	1
Iranian Journal of Medical Hypotheses and Ideas					Iranian Journal of Medical Hypotheses & Ideas		17359104		0	0	1	0	0	0	1	0	1
Journal für Fertilitat und Reproduktion					Journal fÃ¼r FertilitÃ¤t und Reproduktion		1019066X	16809416	0	0	1	0	0	0	1	0	0
Journal für Menopause					Journal fÃ¼r Menopause		10230904	16809394	0	0	1	0	0	0	1	0	0
Mapfre Medicina					Revista MAPFRE Medicina		11305665		0	0	1	0	0	0	1	0	0
Revista Amrigs					Revista da AMRIGS		01022105		1	0	1	0	0	0	1	0	0
Scientific Research and Essays					Scientific Research and Essays		19922248		1	0	1	0	0	0	1	0	1
Microbial Ecology in Health and Disease		Microbial Ecology in Health and Disease	Microbial ecology in health and disease		Microbial Ecology in Health and Disease		0891060X	16512235	1	0	1	0	1	1	1	0	1
Applied Medical Informatics			Applied medical informatics		Applied Medical Informatics		12245593	20677855	1	0	1	0	0	1	1	0	1
Journal of Human Ecology			Journal of human ecology (Delhi, India)		Journal of Human Ecology		09709274		1	0	1	0	0	1	1	0	1
Revista Romana De Statistica			Revista romana de statistica : organ al Comisiei Nationale pentru Statistica		Revista RomÃ¢nÄ? de StatisticÄ?		1018046X	18447694	1	0	1	0	0	1	1	0	0
Revue historique des armees			Revue historique des armees		Revue Historique des ArmÃ©es		00353299	19650779	1	0	1	0	0	1	1	0	0
Utah law review			Utah law review		Utah Law Review		00421448	19428529	1	0	1	0	0	1	1	0	1
Communicable diseases intelligence			Communicable diseases intelligence		Communicable Diseases Intelligence		07253141	14454866	1	0	1	0	0	1	1	0	1
Israel Journal of Medical Sciences			Israel journal of medical sciences		Israel Journal of Medical Sciences		00212180		0	0	1	0	0	1	1	0	1
Open Epidemiology Journal			The open epidemiology journal		Open Epidemiology Journal		18742971		1	0	1	0	0	1	1	0	1
RGO			RGO		RGO : Revista GaÃºcha de Odontologia		01036971	19818637	1	0	1	0	0	1	1	0	1
Nigerian medical journal : journal of the Nigeria Medical Association		Nigerian Medical Journal : Journal of the Nigeria Medical Association	Nigerian medical journal : journal of the Nigeria Medical Association		Nigerian Medical Journal		03001652	2229774X	1	0	1	0	1	1	1	0	1
Annual Review of CyberTherapy and Telemedicine				Annual Review of CyberTherapy and Telemedicine	Annual Review of Cybertherapy and Telemedicine		15548716		1	1	1	0	0	0	1	0	1
Cellular Therapy and Transplantation			Cellular therapy and transplantation	Cellular Therapy and Transplantation	Cellular Therapy and Transplantation		1867416X	18668836	0	1	1	0	0	1	1	0	1
Curationis	Curationis		Curationis	Curationis	Curationis		03798577	22236279	1	1	1	1	0	1	1	0	1
Hepatitis B Annual				Hepatitis B Annual	Hepatitis B Annual		09729747	19983573	0	1	1	0	0	0	1	0	1
Human Genomics and Proteomics		Human Genomics and Proteomics : HGP	Human genomics and proteomics : HGP	Human Genomics and Proteomics	Human Genomics and Proteomics		17574242	17574242	0	1	1	0	1	1	1	0	1
Internet Journal of Asthma, Allergy and Immunology				Internet Journal of Asthma, Allergy and Immunology	The Internet Journal of Asthma, Allergy and Immunology		15320642	15320642	1	1	1	0	0	0	1	0	1
Internet Journal of Cardiology				Internet Journal of Cardiology	The Internet Journal of Cardiology		1528834X	1528834X	1	1	1	0	0	0	1	0	1
Internet Journal of Dermatology				Internet Journal of Dermatology	The Internet Journal of Dermatology		15313018	15313018	1	1	1	0	0	0	1	0	1
Internet Journal of Epidemiology				Internet Journal of Epidemiology	The Internet Journal of Epidemiology		15402614	15402614	1	1	1	0	0	0	1	0	1
Internet Journal of Gynecology and Obstetrics				Internet Journal of Gynecology and Obstetrics	The Internet Journal of Gynecology and Obstetrics		15288439	15288439	1	1	1	0	0	0	1	0	1
Internet Journal of Hematology				Internet Journal of Hematology	The Internet Journal of Hematology		15402649	15402649	1	1	1	0	0	0	1	0	1
Internet Journal of Infectious Diseases				Internet Journal of Infectious Diseases	The Internet Journal of Infectious Diseases		15288366	15288366	1	1	1	0	0	0	1	0	1
Internet Journal of Internal Medicine				Internet Journal of Internal Medicine	The Internet Journal of Internal Medicine		15288382	15288382	1	1	1	0	0	0	1	0	1
Internet Journal of Neurology				Internet Journal of Neurology	The Internet Journal of Neurology		1531295X	1531295X	1	1	1	0	0	0	1	0	1
Internet Journal of Oncology				Internet Journal of Oncology	The Internet Journal of Oncology		15288331	15288331	1	1	1	0	0	0	1	0	1
Internet Journal of Pediatrics and Neonatology			The Internet journal of pediatrics and neonatology	Internet Journal of Pediatrics and Neonatology	The Internet Journal of Pediatrics and Neonatology		15288374	15288374	1	1	1	0	0	1	1	0	1
Internet Journal of Pharmacology				Internet Journal of Pharmacology	The Internet Journal of Pharmacology		15312976	15312976	1	1	1	0	0	0	1	0	1
Internet Journal of Pulmonary Medicine				Internet Journal of Pulmonary Medicine	The Internet Journal of Pulmonary Medicine		15312984	15312984	1	1	1	0	0	0	1	0	1
Internet Journal of Third World Medicine				Internet Journal of Third World Medicine	The Internet Journal of Third World Medicine		15394646	15394646	1	1	1	0	0	0	1	0	1
Internet Journal of Tropical Medicine				Internet Journal of Tropical Medicine	The Internet Journal of Tropical Medicine		15402681	15402681	1	1	1	0	0	0	1	0	1
Nigerian journal of physiological sciences : official publication of the Physiological Society of Nigeria	Nigerian journal of physiological sciences : official publication of the Physiological Society of Nigeria		Nigerian journal of physiological sciences : official publication of the Physiological Society of Nigeria	Nigerian journal of physiological sciences : official publication of the Physiological Society of Nigeria	Nigerian Journal of Physiological Sciences		0794859X		1	1	1	1	0	1	1	0	1
Prilozi / Makedonska akademija na naukite i umetnostite, Oddelenie za bioloiki i medicinski nauki = Contributions / Macedonian Academy of Sciences and Arts, Section of Biological and Medical Sciences.	Prilozi / Makedonska akademija na naukite i umetnostite, Oddelenie za biolo?ki i medicinski nauki = Contributions / Macedonian Academy of Sciences and Arts, Section of Biological and Medical Sciences		Prilozi / Makedonska akademija na naukite i umetnostite, Oddelenie za bioloski i medicinski nauki = Contributions / Macedonian Academy of Sciences and Arts, Section of Biological and Medical Sciences	Prilozi / Makedonska akademija na naukite i umetnostite, Oddelenie za biolo?ki i medicinski nauki = Contributions / Macedonian Academy of Sciences and Arts, Section of Biological and Medical Sciences	Prilozi : Oddelenie za BioloÅ¡ki i Medicinski Nauki		03513254		1	1	1	1	0	1	1	0	1
Sports Medicine, Arthroscopy, Rehabilitation, Therapy and Technology		Sports Medicine, Arthroscopy, Rehabilitation, Therapy &#x0026; Technology: SMARTT	Sports medicine, arthroscopy, rehabilitation, therapy & technology : SMARTT	Sports Medicine, Arthroscopy, Rehabilitation, Therapy and Technology			17582555	17582555	0	1	1	0	1	1	0	0	1
BMC Clinical Pharmacology		BMC Clinical Pharmacology	BMC clinical pharmacology		BMC Clinical Pharmacology		14726904	14726904	0	0	1	0	1	1	1	0	1
Clinical and Developmental Immunology		Clinical and Developmental Immunology	Clinical & developmental immunology		Clinical and Developmental Immunology	CLIN DEV IMMUNOL	17402522	17402530	0	0	1	0	1	1	1	1	1	3.064
Current Chemical Genomics		Current Chemical Genomics	Current chemical genomics	Current Chemical Genomics	Current Chemical Genomics		18753973	18753973	0	1	1	0	1	1	1	0	1
Neural Plasticity	Neural plasticity	Neural Plasticity	Neural plasticity	Neural Plasticity	Neural Plasticity	NEURAL PLAST	20905904	16875443	1	1	1	1	1	1	1	1	1	2.864
Primary Care Companion to the Journal of Clinical Psychiatry		Primary Care Companion to The Journal of Clinical Psychiatry	Primary care companion to the Journal of clinical psychiatry	Primary Care Companion to the Journal of Clinical Psychiatry	Primary Care Companion to the Journal Clinical Psychiatry		15235998	1555211X	0	1	1	0	1	1	1	0	1
Southern Med Review		Southern Med Review	Southern med review	Southern Med Review	Southern Med Review		11742704	11742704	0	1	1	0	1	1	1	0	1
Anales Venezolanos de Nutricion							07980752		1	0	1	0	0	0	0	0	0
Iranian Red Crescent Medical Journal						IRAN RED CRESCENT ME	15614395	15614395	1	0	1	0	0	0	0	1	1	0.333
Open Nursing Journal		The Open Nursing Journal	The open nursing journal				18744346	18744346	1	0	1	0	1	1	0	0	1
Acta Facultatis Medicae Naissensis				Acta Facultatis Medicae Naissensis			03516083	22172521	1	1	1	0	0	0	0	0	1
Basic and Clinical Neuroscience				Basic and Clinical Neuroscience			2008126X		1	1	1	0	0	0	0	0	1
Chemical and Pharmaceutical Bulletin	Chemical & pharmaceutical bulletin		Chemical & pharmaceutical bulletin	Chemical and Pharmaceutical Bulletin		CHEM PHARM BULL	00092363	13475223	1	1	1	1	0	1	0	1	1	1.564
Journal of Breast Cancer		Journal of Breast Cancer	Journal of breast cancer	Journal of Breast Cancer		J BREAST CANCER	17386756	20929900	1	1	1	0	1	1	0	1	1	0.773
Journal of Circadian Rhythms		Journal of Circadian Rhythms	Journal of circadian rhythms	Journal of Circadian Rhythms			17403391	17403391	1	1	1	0	1	1	0	0	1
Middle East Fertility Society Journal			Middle East Fertility Society journal	Middle East Fertility Society Journal			11105690	20903251	1	1	1	0	0	1	0	0	1
Open Critical Care Medicine Journal			The open critical care medicine journal	Open Critical Care Medicine Journal			18748287	18748287	1	1	1	0	0	1	0	0	1
Open Hypertension Journal			The open hypertension journal	Open Hypertension Journal			18765262	18765262	1	1	1	0	0	1	0	0	1
Przeglad Pediatryczny				Przeglad Pediatryczny			0137723X	20835752	1	1	1	0	0	0	0	0	0
South African Family Practice				South African Family Practice			10251979	1726426X	1	1	1	0	0	0	0	0	1
Tidsskrift for den Norske Laegeforening	Tidsskrift for den Norske lægeforening : tidsskrift for praktisk medicin, ny række		Tidsskrift for den Norske laegeforening : tidsskrift for praktisk medicin, ny raekke	Tidsskrift for den Norske lægeforening : tidsskrift for praktisk medicin, ny række			00292001	08077096	1	1	1	1	0	1	0	0	0
Brazilian Archives of Biology and Technology					Brazilian Archives of Biology and Technology	BRAZ ARCH BIOL TECHN	15168913	16784324	1	0	1	0	0	0	1	1	1	0.473
Journal of Coloproctology					Journal of Coloproctology		22379363		1	0	1	0	0	0	1	0	1
Acta Colombiana de Psicologia					Acta Colombiana de Psicologia		01239155	19099711	1	0	1	0	0	0	1	0	0
Govaresh					Govaresh		15607186	2008756X	1	0	1	0	0	0	1	0	1
International Journal of Applied Research in Veterinary Medicine					The Journal of Applied Research in Veterinary Medicine	INT J APPL RES VET M	15422666	1559470X	1	0	1	0	0	0	1	1	1	0.443
Motricidade					Motricidade		1646107X	21822972	1	0	1	0	0	0	1	0	1
Plant Root					Plant Root		18816754		1	0	1	0	0	0	1	0	1
Revista Brasileira de Medicina do Esporte					Revista Brasileira de Medicina do Esporte	REV BRAS MED ESPORTE	15178692	18069940	1	0	1	0	0	0	1	1	1	0.268
Revista Colombiana de Anestesiologia					Colombian Journal of Anesthesiology		01203347	21454604	1	0	1	0	0	0	1	0	1
International Journal of Microbiology		International Journal of Microbiology	International journal of microbiology		International Journal of Microbiology		1687918X	16879198	1	0	1	0	1	1	1	0	1
Central European Journal of Urology		Central European Journal of Urology	Central European journal of urology		Central European Journal of Urology		20804806	20804873	1	0	1	0	1	1	1	0	1
Oman Journal of Ophthalmology		Oman Journal of Ophthalmology	Oman journal of ophthalmology		Oman Journal of Ophthalmology		0974620X	09747842	1	0	1	0	1	1	1	0	1
Tropical Life Sciences Research		Tropical Life Sciences Research	Tropical life sciences research		Tropical Life Sciences Research		19853718	21804249	1	0	1	0	1	1	1	0	1
African Journal of Primary Health Care and Family Medicine			African journal of primary health care & family medicine		African Journal of Primary Health Care & Family Medicine		20712928	20712936	1	0	1	0	0	1	1	0	1
Avances en odontoestomatologia			Avances en odontoestomatologia		Avances en OdontoestomatologÃ­a		02131285	23403152	1	0	1	0	0	1	1	0	0
BMC Pharmacology		BMC Pharmacology	BMC pharmacology		BMC Pharmacology		14712210	14712210	0	0	1	0	1	1	1	0	1
Nature and Science of Sleep		Nature and Science of Sleep	Nature and science of sleep		Nature and Science of Sleep		11791608	11791608	1	0	1	0	1	1	1	0	1
Advances in medical sciences	Advances in medical sciences		Advances in medical sciences	Advances in Medical Sciences	Advances in Medical Sciences	ADV MED SCI-POLAND	18961126	18984002	1	1	1	1	0	1	1	1	1	0.796
Annals of African Medicine	Annals of African medicine		Annals of African medicine	Annals of African Medicine	Annals of African Medicine		15963519	09755764	1	1	1	1	0	1	1	0	1
Annals of Long-Term Care			The annals of long-term care : the official journal of the American Medical Directors Association	Annals of Long-Term Care	Annals of Long-Term Care		15247929	19435010	1	1	1	0	0	1	1	0	1
Annals of Pediatric Cardiology		Annals of Pediatric Cardiology	Annals of pediatric cardiology	Annals of Pediatric Cardiology	Annals of Pediatric Cardiology		09742069	09745149	1	1	1	0	1	1	1	0	1
Austrian Journal of Clinical Endocrinology and Metabolism				Austrian Journal of Clinical Endocrinology and Metabolism	Journal fÃ¼r Klinische Endokrinologie und Stoffwechsel		19987773	19987781	1	1	1	0	0	0	1	0	0
BMC Pediatrics	BMC pediatrics	BMC Pediatrics	BMC pediatrics	BMC Pediatrics	BMC Pediatrics	BMC PEDIATR	14712431	14712431	1	1	1	1	1	1	1	1	1	1.982
Bulletin of the World Health Organization	Bulletin of the World Health Organization	Bulletin of the World Health Organization	Bulletin of the World Health Organization	Bulletin of the World Health Organization	Bulletin of the World Health Organization	B WORLD HEALTH ORGAN	00429686	15640604	1	1	1	1	1	1	1	1	1	5.25
Cell Communication and Signaling	Cell communication and signaling : CCS	Cell Communication and Signaling : CCS	Cell communication and signaling : CCS	Cell Communication and Signaling	Cell Communication and Signaling	CELL COMMUN SIGNAL	1478811X	1478811X	1	1	1	1	1	1	1	1	1	5.093
Chinese Journal of Lung Cancer	Zhongguo fei ai za zhi = Chinese journal of lung cancer		Zhongguo fei ai za zhi = Chinese journal of lung cancer	Chinese Journal of Lung Cancer	Chinese Journal of Lung Cancer		10093419	19996187	1	1	1	1	0	1	1	0	0
Electronic Journal of Biotechnology			Electronic journal of biotechnology : EJB	Electronic Journal of Biotechnology	Electronic Journal of Biotechnology	ELECTRON J BIOTECHN	07173458	07173458	1	1	1	0	0	1	1	1	1	0.827
Experimental Animals	Experimental animals / Japanese Association for Laboratory Animal Science		Experimental animals / Japanese Association for Laboratory Animal Science	Experimental Animals	Experimental Animals	EXP ANIM TOKYO	13411357	18817122	1	1	1	1	0	1	1	1	1	1.456
Family Medicine	Family medicine		Family medicine	Family medicine	Family Medicine	FAM MED	07423225	19383800	1	1	1	1	0	1	1	1	1	1.204
Genetics, Selection, Evolution	Genetics, selection, evolution : GSE	Genetics, Selection, Evolution : GSE	Genetics, selection, evolution : GSE	Genetics, selection, evolution : GSE	Genetics Selection Evolution	GENET SEL EVOL	0999193X	12979686	1	1	1	1	1	1	1	1	1	3.494
GERMS		Germs	Germs	GERMS	Germs		22482997	22482997	1	1	1	0	1	1	1	0	1
Gerokomos				Gerokomos	Gerokomos		1134928X	1578164X	1	1	1	0	0	0	1	0	0
Global journal of health science	Global journal of health science		Global journal of health science	Global journal of health science	Global Journal of Health Science		19169736	19169744	1	1	1	1	0	1	1	0	1
Globalization and Health	Globalization and health	Globalization and Health	Globalization and health	Globalization and Health	Globalization and Health	GLOBALIZATION HEALTH	17448603	17448603	1	1	1	1	1	1	1	1	1	1.485
Harm Reduction Journal	Harm reduction journal	Harm Reduction Journal	Harm reduction journal	Harm Reduction Journal	Harm Reduction Journal	HARM REDUCT J	14777517	14777517	1	1	1	1	1	1	1	1	1	1.484
Giornale di Chirurgia	Il Giornale di chirurgia	Il Giornale di Chirurgia	Il Giornale di chirurgia	Il Giornale di chirurgia	Il Giornale di Chirurgia		03919005	1971145X	1	1	1	1	1	1	1	0	1
Indian Journal of Sexually Transmitted Diseases		Indian Journal of Sexually Transmitted Diseases	Indian journal of sexually transmitted diseases	Indian Journal of Sexually Transmitted Diseases	Indian Journal of Sexually Transmitted Diseases		02537184	19983816	1	1	1	0	1	1	1	0	1
International Journal of Inflammation		International Journal of Inflammation	International journal of inflammation	International Journal of Inflammation	International Journal of Inflammation		20908040	20420099	1	1	1	0	1	1	1	0	1
Iranian Biomedical Journal	Iranian biomedical journal	Iranian Biomedical Journal	Iranian biomedical journal	Iranian Biomedical Journal	Iranian Biomedical Journal		1028852X	2008823X	1	1	1	1	1	1	1	0	1
Iranian Journal of Allergy, Asthma and Immunology	Iranian journal of allergy, asthma, and immunology		Iranian journal of allergy, asthma, and immunology	Iranian Journal of Allergy, Asthma and Immunology	Iranian Journal Of Allergy, Asthma and Immunology	IRAN J ALLERGY ASTHM	17351502	17355249	1	1	1	1	0	1	1	1	1	0.653
Iranian Journal of Kidney Diseases	Iranian journal of kidney diseases		Iranian journal of kidney diseases	Iranian Journal of Kidney Diseases	Iranian Journal of Kidney Diseases	IRAN J KIDNEY DIS	17358582	17358604	1	1	1	1	0	1	1	1	1	0.94
Iranian Journal of Pharmaceutical Research		Iranian Journal of Pharmaceutical Research : IJPR	Iranian journal of pharmaceutical research : IJPR	Iranian Journal of Pharmaceutical Research	Iranian Journal of Pharmaceutical Research	IRAN J PHARM RES	17350328	17266890	1	1	1	0	1	1	1	1	1	0.54
Journal of Infection in Developing Countries	Journal of infection in developing countries		Journal of infection in developing countries	Journal of Infection in Developing Countries	Journal of Infection in Developing Countries	J INFECT DEV COUNTR	20366590	19722680	1	1	1	1	0	1	1	1	1	0.996
Journal of Medical Case Reports		Journal of Medical Case Reports	Journal of medical case reports	Journal of Medical Case Reports	Journal of Medical Case Reports		17521947	17521947	1	1	1	0	1	1	1	0	1
Journal of Medical Internet Research	Journal of medical Internet research	Journal of Medical Internet Research	Journal of medical Internet research	Journal of medical Internet research	Journal of Medical Internet Research	J MED INTERNET RES	14394456	14388871	1	1	1	1	1	1	1	1	1	3.768
Journal of Neuroinflammation	Journal of neuroinflammation	Journal of Neuroinflammation	Journal of neuroinflammation	Journal of Neuroinflammation	Journal of Neuroinflammation	J NEUROINFLAMM	17422094	17422094	1	1	1	1	1	1	1	1	1	4.351
Journal of Rehabilitation Research and Development	Journal of rehabilitation research and development		Journal of rehabilitation research and development	Journal of Rehabilitation Research and Development	Journal of Rehabilitation Research and Development	J REHABIL RES DEV	07487711	19381352	1	1	1	1	0	1	1	1	1	1.408
Journal of RNAi and Gene Silencing		Journal of RNAi and Gene Silencing : An International Journal of RNA and Gene Targeting Research	Journal of RNAi and gene silencing : an international journal of RNA and gene targeting research	Journal of RNAi and Gene Silencing	Journal of RNAi and Gene Silencing		17470854	17470854	1	1	1	0	1	1	1	0	1
Lipids in Health and Disease	Lipids in health and disease	Lipids in Health and Disease	Lipids in health and disease	Lipids in Health and Disease	Lipids in Health and Disease	LIPIDS HEALTH DIS	1476511X	1476511X	1	1	1	1	1	1	1	1	1	2.015
Japanese Journal of Medical Mycology	Medical mycology journal		Nihon Ishinkin Gakkai zasshi = Japanese journal of medical mycology	Medical mycology journal	Japanese Journal of Medical Mycology		21856486	18820476	1	1	1	1	0	1	1	0	1
Obesity Facts	Obesity facts	Obesity Facts	Obesity facts	Obesity Facts	Obesity Facts	OBESITY FACTS	16624025	16624033	1	1	1	1	1	1	1	1	1	1.583
Oncogenesis		Oncogenesis	Oncogenesis	Oncogenesis	Oncogenesis		21579024	21579024	1	1	1	0	1	1	1	0	1
Open Colorectal Cancer Journal				Open Colorectal Cancer Journal	Open Colorectal Cancer Journal		18768202	18768202	1	1	1	0	0	0	1	0	1
Open Nuclear Medicine Journal			The open nuclear medicine journal	Open Nuclear Medicine Journal	Open Nuclear Medicine Journal		1876388X	1876388X	1	1	1	0	0	1	1	0	1
Open Nutraceuticals Journal			The open nutraceuticals journal	Open Nutraceuticals Journal	Open Nutraceuticals Journal		18763960	18763960	1	1	1	0	0	1	1	0	1
Philosophy, Ethics, and Humanities in Medicine	Philosophy, ethics, and humanities in medicine : PEHM	Philosophy, Ethics, and Humanities in Medicine : PEHM	Philosophy, ethics, and humanities in medicine : PEHM	Philosophy, ethics, and humanities in medicine : PEHM	Philosophy, Ethics, and Humanities in Medicine		17475341	17475341	1	1	1	1	1	1	1	0	1
PLoS Medicine	PLoS medicine	PLoS Medicine	PLoS medicine	PLoS Medicine	PLoS Medicine	PLOS MED	15491277	15491676	1	1	1	1	1	1	1	1	1	15.253
Revista Argentina de Endocrinologia y Metabolismo				Revista Argentina de Endocrinologia y Metabolismo	Revista Argentina de EndocrinologÃ­a y Metabolismo		03264610	18513034	1	1	1	0	0	0	1	0	1
Revista Argentina de Microbiologia	Revista Argentina de microbiología		Revista Argentina de microbiologia	Revista Argentina de Microbiologia	Revista Argentina de MicrobiologÃ­a	REV ARGENT MICROBIOL	03257541	18517617	1	1	1	1	0	1	1	1	1	0.543
Revista da Sociedade Brasileira de Medicina Tropical	Revista da Sociedade Brasileira de Medicina Tropical		Revista da Sociedade Brasileira de Medicina Tropical	Revista da Sociedade Brasileira de Medicina Tropical	Revista da Sociedade Brasileira de Medicina Tropical	REV SOC BRAS MED TRO	00378682	16789849	1	1	1	1	0	1	1	1	1	0.926
Revista Paulista de Pediatria	Revista paulista de pediatria : orgão oficial da Sociedade de Pediatria de São Paulo		Revista paulista de pediatria : orgao oficial da Sociedade de Pediatria de Sao Paulo	Revista Paulista de Pediatria	Revista Paulista de Pediatria		01030582	19840462	1	1	1	1	0	1	1	0	1
Scientia Pharmaceutica		Scientia Pharmaceutica	Scientia pharmaceutica	Scientia Pharmaceutica	Scientia Pharmaceutica		00368709	22180532	1	1	1	0	1	1	1	0	1
Scientific Reports	Scientific reports	Scientific Reports	Scientific reports	Scientific reports	Scientific Reports	SCI REP-UK	20452322	20452322	1	1	1	1	1	1	1	1	1	2.927
Trials	Trials	Trials	Trials	Trials	Trials	TRIALS	17456215	17456215	1	1	1	1	1	1	1	1	1	2.206
Turkish Journal of Rheumatology				Turkish Journal of Rheumatology	Turkish Journal of Rheumatology	TURK J RHEUMATOL	13090291	13090283	1	1	1	0	0	0	1	1	1	0.172
Upsala Journal of Medical Sciences	Upsala journal of medical sciences	Upsala Journal of Medical Sciences	Upsala journal of medical sciences	Upsala journal of medical sciences	Upsala Journal of Medical Sciences	UPSALA J MED SCI	03009734	20001967	1	1	1	1	1	1	1	1	1	1.42
Veterinaria Italiana	Veterinaria italiana		Veterinaria italiana	Veterinaria italiana	Veterinaria Italiana	VET ITAL	0505401X	18281427	1	1	1	1	0	1	1	1	1	0.519
Tecnica Pecuaria en Mexico							00401889		1	0	1	0	0	0	0	0	0
Biology and Medicine			Biology and medicine (Aligarh)				09748369	09748369	1	0	1	0	0	1	0	0	1
Immunology and Immunogenetics Insights			Immunology and immunogenetics insights				11786345	11786345	1	0	1	0	0	1	0	0	1
Italian Journal of Public Health			Italian journal of public health				17237807	17237815	1	0	1	0	0	1	0	0	0
New West Indian Guide/Nieuwe West-Indische Gids (NWIG)			Nieuwe West-Indische gids				00289930		1	0	1	0	0	1	0	0	1
Open Neuroscience Journal			The open neuroscience journal				18740820	18740820	1	0	1	0	0	1	0	0	1
Pesquisa odontologica brasileira = Brazilian oral research			Pesquisa odontologica brasileira = Brazilian oral research				15177491		1	0	1	0	0	1	0	0	1
Trends in Biomaterials and Artificial Organs			Trends in biomaterials & artificial organs				09711198		1	0	1	0	0	1	0	0	1
Beitrage zur Tabakforschung International/ Contributions to Tobacco Research							0173783X		1	0	1	0	0	0	0	0	1
Medicina Fluminensis							18476864		1	0	1	0	0	0	0	0	0
Acta Stomatologica Naissi							03525252	18201202	1	0	1	0	0	0	0	0	0
Asian Journal of Biochemistry							18159923		1	0	1	0	0	0	0	0	1
Canadian Journal of Speech-Language Pathology and Audiology							1913200X		1	0	1	0	0	0	0	0	1
Clinical Medicine Insights: Endocrinology and Diabetes							11781173		1	0	1	0	0	0	0	0	1
Health Care and Informatics Review Online							11764201		1	0	1	0	0	0	0	0	1
International Journal of Bio-Science and Bio-Technology							22337849		1	0	1	0	0	0	0	0	1
Iranian Journal of Pediatrics							10184406		1	0	1	0	0	0	0	0	1
Iranian Journal of Public Health							03044556		1	0	1	0	0	0	0	0	1
Japan Agricultural Research Quarterly						JARQ-JPN AGR RES Q	00213551	00213551	1	0	1	0	0	0	0	1	1	0.468
Journal of Applied Biological Sciences							13071130		1	0	1	0	0	0	0	0	1
Journal of Physical Education and Sport							15828131	20662483	1	0	1	0	0	0	0	0	1
Journal of the Japanese Physical Therapy Association							13441272		1	0	1	0	0	0	0	0	1
Revista de la Sociedad Espanola de Enfermeria Nefrologica							11391375		1	0	1	0	0	0	0	0	0
Sport Science							18403662	18403670	1	0	1	0	0	0	0	0	1
Journal of Indian Prosthodontist Society		The Journal of the Indian Prosthodontic Society	Journal of Indian Prosthodontic Society				09724052	19984057	1	0	1	0	1	1	0	0	1
Journal of Clinical Neurology		Journal of Clinical Neurology (Seoul, Korea)	Journal of clinical neurology (Seoul, Korea)			J CLIN NEUROL	17386586	20055013	1	0	1	0	1	1	0	1	1	1.892
Acta Naturae		Acta Naturae	Acta naturae			ACTA NATURAE	20758251	20758251	1	0	1	0	1	1	0	1	1	0.477
Annals of Rehabilitation Medicine		Annals of Rehabilitation Medicine	Annals of rehabilitation medicine				22340645	22340653	1	0	1	0	1	1	0	0	1
Asian Spine Journal		Asian Spine Journal	Asian spine journal				19761902	19767846	1	0	1	0	1	1	0	0	1
Clinical and Experimental Reproductive Medicine		Clinical and Experimental Reproductive Medicine	Clinical and experimental reproductive medicine				22338233	22338241	1	0	1	0	1	1	0	0	1
Clinical Endoscopy		Clinical Endoscopy	Clinical endoscopy				22342400	22342443	1	0	1	0	1	1	0	0	1
European Journal of Dentistry		European Journal of Dentistry	European journal of dentistry				13057456	13057464	1	0	1	0	1	1	0	0	1
Healthcare Informatics Research		Healthcare Informatics Research	Healthcare informatics research				20933681	2093369X	1	0	1	0	1	1	0	0	1
Imaging Science in Dentistry		Imaging Science in Dentistry	Imaging science in dentistry				22337822	22337830	1	0	1	0	1	1	0	0	1
International Journal for Parasitology: Parasites and Wildlife		International Journal for Parasitology: Parasites and Wildlife	International journal for parasitology. Parasites and wildlife				22132244	22132244	1	0	1	0	1	1	0	0	1
International Journal of Trichology		International Journal of Trichology	International journal of trichology				09747753	09749241	1	0	1	0	1	1	0	0	1
Journal of Advanced Prosthodontics		The Journal of Advanced Prosthodontics	The journal of advanced prosthodontics			J ADV PROSTHODONT	20057806	20057814	1	0	1	0	1	1	0	1	1	0.486
Journal of Human Kinetics		Journal of Human Kinetics	Journal of human kinetics			J HUM KINET	16405544	18997562	1	0	1	0	1	1	0	1	1	0.458
Journal of Natural Science, Biology and Medicine		Journal of Natural Science, Biology, and Medicine	Journal of natural science, biology, and medicine				09769668	22297707	1	0	1	0	1	1	0	0	1
Journal of Periodontal and Implant Science		Journal of Periodontal &#x0026; Implant Science	Journal of periodontal & implant science				20932278	20932286	1	0	1	0	1	1	0	0	1
Korean Journal of Audiology		Korean Journal of Audiology	Korean journal of audiology				20929862	20933797	1	0	1	0	1	1	0	0	1
Korean Journal of Family Medicine		Korean Journal of Family Medicine	Korean journal of family medicine				20056443	20926715	1	0	1	0	1	1	0	0	1
Korean Journal of Orthodontics		Korean Journal of Orthodontics	Korean journal of orthodontics			KOREAN J ORTHOD	22347518	2005372X	1	0	1	0	1	1	0	1	1	0.537
Korean Journal of Thoracic and Cardiovascular Surgery		The Korean Journal of Thoracic and Cardiovascular Surgery	The Korean journal of thoracic and cardiovascular surgery				2233601X	20936516	1	0	1	0	1	1	0	0	1
Mycobiology		Mycobiology	Mycobiology				12298093	20929323	1	0	1	0	1	1	0	0	1
Nutrition Research and Practice		Nutrition Research and Practice	Nutrition research and practice			NUTR RES PRACT	19761457	20056168	1	0	1	0	1	1	0	1	1	0.973
Persoonia		Persoonia : Molecular Phylogeny and Evolution of Fungi	Persoonia			PERSOONIA	00315850	18789080	1	0	1	0	1	1	0	1	1	3.486
Polish Journal of Radiology		Polish Journal of Radiology	Polish journal of radiology / Polish Medical Society of Radiology				1733134X	18990967	1	0	1	0	1	1	0	0	1
Preventive Nutrition and Food Science		Preventive Nutrition and Food Science	Preventive nutrition and food science				22871098	22878602	1	0	1	0	1	1	0	0	1
Rice		Rice	Rice (New York, N.Y.)			RICE	19398425	19398433	1	0	1	0	1	1	0	1	1	2.381
Journal of Environmental Health Science and Engineering		Journal of Environmental Health Science and Engineering	Journal of environmental health science & engineering					2052336X	1	0	1	0	1	1	0	0	1
Medical Journal of the Islamic Republic of Iran		Medical Journal of the Islamic Republic of Iran	Medical journal of the Islamic Republic of Iran				10161430	22516840	1	0	1	0	1	1	0	0	1
Acta Clinica Croatica	Acta clinica Croatica		Acta clinica Croatica	Acta Clinica Croatica		ACTA CLIN CROAT	03539466	13339451	1	1	1	1	0	1	0	1	1	0.28
Acta Informatica Medica		Acta Informatica Medica	Acta informatica medica : AIM : journal of the Society for Medical Informatics of Bosnia & Herzegovina : casopis Drustva za medicinsku informatiku BiH	Acta Informatica Medica			03538109	19865988	1	1	1	0	1	1	0	0	1
Acta Medica Nagasakiensia			Acta medica Nagasakiensia	Acta Medica Nagasakiensia			00016055		1	1	1	0	0	1	0	0	1
African Journal Biomedical Research				African Journal of Biomedical Research			11195096		1	1	1	0	0	0	0	0	1
African Journal of Infectious Diseases		African Journal of Infectious Diseases	African journal of infectious diseases	African Journal of Infectious Diseases			20060165		1	1	1	0	1	1	0	0	1
Alcohol research : current reviews	Alcohol research : current reviews	Alcohol Research : Current Reviews	Alcohol research : current reviews	Alcohol research : current reviews			21683492	21694796	1	1	1	1	1	1	0	0	1
Allergy, Asthma and Immunology Research		Allergy, Asthma &#x0026; Immunology Research	Allergy, asthma & immunology research	Allergy, Asthma and Immunology Research		ALLERGY ASTHMA IMMUN	20927355	20927363	1	1	1	0	1	1	0	1	1	2.653
American Journal of Case Reports		The American Journal of Case Reports	The American journal of case reports	American Journal of Case Reports			19415923	19415923	1	1	1	0	1	1	0	0	1
Anil Aggrawal's Internet Journal of Forensic Medicine and Toxicology				Anil Aggrawal's Internet Journal of Forensic Medicine and Toxicology			09728066	09728074	1	1	1	0	0	0	0	0	1
Annals of Coloproctology		Annals of Coloproctology	Annals of coloproctology	Annals of Coloproctology			22879714	22879722	1	1	1	0	1	1	0	0	0
Annals of Laboratory Medicine	Annals of laboratory medicine	Annals of Laboratory Medicine	Annals of laboratory medicine	Annals of laboratory medicine		ANN LAB MED	22343806	22343814	1	1	1	1	1	1	0	1	1
Archivos Latinoamericanos de Nutricion	Archivos latinoamericanos de nutrición		Archivos latinoamericanos de nutricion	Archivos latinoamericanos de nutrición		ARCH LATINOAM NUTR	00040622	00040622	1	1	1	1	0	1	0	1	0	0.241
Archivos Venezolanos de Farmacologia y Terapeutica				Archivos Venezolanos de Farmacologia y Terapeutica			07980264		1	1	1	0	0	0	0	0	1
Asian Pacific Journal of Cancer Prevention	Asian Pacific journal of cancer prevention : APJCP		Asian Pacific journal of cancer prevention : APJCP	Asian Pacific journal of cancer prevention : APJCP		ASIAN PAC J CANCER P	15137368	15137368	1	1	1	1	0	1	0	1	1	1.271
Balkan Medical Journal				Balkan Medical Journal		BALK MED J	21463123	21463131	1	1	1	0	0	0	0	1	1	0.076
Behavioural Neurology	Behavioural neurology	Behavioural Neurology	Behavioural neurology	Behavioural Neurology		BEHAV NEUROL	09534180	18758584	1	1	1	1	1	1	0	1	1	1.247
Biological and Pharmaceutical Bulletin	Biological & pharmaceutical bulletin		Biological & pharmaceutical bulletin	Biological and Pharmaceutical Bulletin		BIOL PHARM BULL	09186158	13475215	1	1	1	1	0	1	0	1	1	1.849
Biomolecules and Therapeutics		Biomolecules &#x0026; Therapeutics	Biomolecules & therapeutics	Biomolecules and Therapeutics		BIOMOL THER	19769148	20054483	1	1	1	0	1	1	0	1	1	0.794
Bioscience, Biotechnology and Biochemistry	Bioscience, biotechnology, and biochemistry		Bioscience, biotechnology, and biochemistry	Bioscience, biotechnology, and biochemistry		BIOSCI BIOTECH BIOCH	09168451	13476947	1	1	1	1	0	1	0	1	1	1.269
Blood Research		Blood research	Blood research	Blood Research			2287979X	22880011	1	1	1	0	1	1	0	0	1
CA - A Cancer Journal for Clinicians	CA: a cancer journal for clinicians		CA: a cancer journal for clinicians	CA Cancer Journal for Clinicians		CA-CANCER J CLIN	00079235	15424863	1	1	1	1	0	1	0	1	1	153.459
Canadian bulletin of medical history = Bulletin canadien dhistoire de la medecine	Canadian bulletin of medical history = Bulletin canadien d'histoire de la médecine		Canadian bulletin of medical history = Bulletin canadien d'histoire de la medecine	Canadian bulletin of medical history = Bulletin canadien d'histoire de la médecine			08232105		1	1	1	1	0	1	0	0	1
Canadian Journal of Surgery	Canadian journal of surgery. Journal canadien de chirurgie	Canadian Journal of Surgery	Canadian journal of surgery. Journal canadien de chirurgie	Canadian journal of surgery. Journal canadien de chirurgie		CAN J SURG	0008428X	14882310	1	1	1	1	1	1	0	1	1	1.631
Cancer Immunity	Cancer immunity	Cancer Immunity	Cancer immunity	Cancer Immunity			14249634	14249634	1	1	1	1	1	1	0	0	1
Cardiovascular Journal of Africa	Cardiovascular journal of Africa	Cardiovascular Journal of Africa	Cardiovascular journal of Africa	Cardiovascular Journal of Africa		CARDIOVASC J AFR	19951892	16800745	1	1	1	1	1	1	0	1	1	0.848
Clinical Diabetes			Clinical diabetes : a publication of the American Diabetes Association	Clinical Diabetes			08918929	19454953	1	1	1	0	0	1	0	0	1
Clinical Medicine Insights: Geriatrics				Clinical Medicine Insights: Geriatrics			11795530	11795530	1	1	1	0	0	0	0	0	1
Clinical Psychopharmacology and Neuroscience		Clinical Psychopharmacology and Neuroscience	Clinical psychopharmacology and neuroscience : the official scientific journal of the Korean College of Neuropsychopharmacology	Clinical Psychopharmacology and Neuroscience			17381088	20934327	1	1	1	0	1	1	0	0	1
CiOS Clinics in Orthopedic Surgery	Clinics in orthopedic surgery	Clinics in Orthopedic Surgery	Clinics in orthopedic surgery	Clinics in Orthopedic Surgery			2005291X	20054408	1	1	1	1	1	1	0	0	1
Diabetes and Metabolism Journal		Diabetes &#x0026; Metabolism Journal	Diabetes & metabolism journal	Diabetes and Metabolism Journal			22336079	22336087	1	1	1	0	1	1	0	0	1
Dialogues in Clinical Neuroscience	Dialogues in clinical neuroscience	Dialogues in Clinical Neuroscience	Dialogues in clinical neuroscience	Dialogues in Clinical Neuroscience			12948322	19585969	1	1	1	1	1	1	0	0	1
Drug Design, Development and Therapy	Drug design, development and therapy	Drug Design, Development and Therapy	Drug design, development and therapy	Drug Design, Development and Therapy		DRUG DES DEV THER	11778881	11778881	1	1	1	1	1	1	0	1	1	3.486
Electrolyte and Blood Pressure		Electrolytes &#x0026; Blood Pressure : E &#x0026; BP	Electrolyte & blood pressure : E & BP	Electrolyte and Blood Pressure			17385997	20929935	1	1	1	0	1	1	0	0	1
European Journal of General Medicine				European Journal of General Medicine			13043889	13043897	1	1	1	0	0	0	0	0	1
F1000 Prime Reports		F1000Prime Reports	F1000prime reports	F1000Prime Reports			20517599	20517599	1	1	1	0	1	1	0	0	1
Frontiers in cellular and infection microbiology	Frontiers in cellular and infection microbiology	Frontiers in Cellular and Infection Microbiology	Frontiers in cellular and infection microbiology	Frontiers in Cellular and Infection Microbiology			22352988	22352988	1	1	1	1	1	1	0	0	1
Gaceta Medica de Mexico	Gaceta médica de México		Gaceta medica de Mexico	Gaceta Medica de Mexico		GAC MED MEX	00163813	00163813	1	1	1	1	0	1	0	1	0	0.128
Gastroenterologia Polska				Gastroenterologia Polska			12329886		1	1	1	0	0	0	0	0	0
Gastroenterology and Hepatology from Bed to Bench		Gastroenterology and Hepatology From Bed to Bench	Gastroenterology and hepatology from bed to bench	Gastroenterology and Hepatology from Bed to Bench			20082258	20084234	1	1	1	0	1	1	0	0	1
Gene Therapy and Molecular Biology			Gene therapy & molecular biology	Gene Therapy and Molecular Biology		GENE THER MOL BIOL	15299120	15299120	1	1	1	0	0	1	0	1	1
Genetics and Molecular Research	Genetics and molecular research : GMR		Genetics and molecular research : GMR	Genetics and Molecular Research		GENET MOL RES	16765680	16765680	1	1	1	1	0	1	0	1	1	0.994
Genomics Proteomics Bioinformatics	Genomics, proteomics & bioinformatics		Genomics, proteomics & bioinformatics	Genomics, Proteomics and Bioinformatics			16720229	22103244	1	1	1	1	0	1	0	0	1
Immunome Research		Immunome Research	Immunome research	Immunome Research			17457580	17457580	1	1	1	0	1	1	0	0	1
Indian Journal of Nephrology		Indian Journal of Nephrology	Indian journal of nephrology	Indian Journal of Nephrology			09714065	19983662	1	1	1	0	1	1	0	0	1
Indian Journal of Nuclear Medicine		Indian Journal of Nuclear Medicine : IJNM : The Official Journal of the Society of Nuclear Medicine, India	Indian journal of nuclear medicine : IJNM : the official journal of the Society of Nuclear Medicine, India	Indian Journal of Nuclear Medicine			09723919	09740244	1	1	1	0	1	1	0	0	1
Indian Journal of Psychiatry		Indian Journal of Psychiatry	Indian journal of psychiatry	Indian Journal of Psychiatry			00195545	19983794	1	1	1	0	1	1	0	0	1
Indian Journal of Urology		Indian Journal of Urology : IJU : Journal of the Urological Society of India	Indian journal of urology : IJU : journal of the Urological Society of India	Indian Journal of Urology			09701591	19983824	1	1	1	0	1	1	0	0	1
Infection and Chemotherapy		Infection &#x0026; Chemotherapy	Infection & chemotherapy	Infection and Chemotherapy			20932340	20926448	1	1	1	0	1	1	0	0	1
Informatics in Primary Care	Informatics in primary care		Informatics in primary care	Informatics in primary care			14760320	14759985	1	1	1	1	0	1	0	0	1
International Heart Journal	International heart journal		International heart journal	International Heart Journal		INT HEART J	13492365	13493299	1	1	1	1	0	1	0	1	1	1.233
International Journal of Biomedical Science		International Journal of Biomedical Science : IJBS	International journal of biomedical science : IJBS	International Journal of Biomedical Science			15509702	15552810	1	1	1	0	1	1	0	0	1
International Journal of Cancer Research				International Journal of Cancer Research			18119727	18119735	1	1	1	0	0	0	0	0	1
International journal of oral science	International journal of oral science	International Journal of Oral Science	International journal of oral science	International journal of oral science		INT J ORAL SCI	16742818	20493169	1	1	1	1	1	1	0	1	1	2.719
International Journal of Pharma and Bio Sciences				International Journal of Pharma and Bio Sciences			09756299	09756299	1	1	1	0	0	0	0	0	1
International Journal of PharmTech Research				International Journal of PharmTech Research			09744304		1	1	1	0	0	0	0	0	1
International Journal of Research in Pharmaceutical Sciences				International Journal of Research in Pharmaceutical Sciences			09757538		1	1	1	0	0	0	0	0	1
Iranian Journal of Endocrinology and Metabolism				Iranian Journal of Endocrinology and Metabolism			16834844	16835476	1	1	1	0	0	0	0	0	0
Iranian Journal of Pharmacology and Therapeutics				Iranian Journal of Pharmacology and Therapeutics			17352657		1	1	1	0	0	0	0	0	1
Irish Journal of Psychological Medicine			Irish journal of psychological medicine	Irish Journal of Psychological Medicine			07909667		1	1	1	0	0	1	0	0	1
Israel Medical Association Journal	The Israel Medical Association journal : IMAJ		The Israel Medical Association journal : IMAJ	Israel Medical Association Journal		ISR MED ASSOC J	15651088	15651088	1	1	1	1	0	1	0	1	1	0.978
Nihon Rinsho Meneki Gakkai kaishi = Japanese journal of clinical immunology	Nihon Rinsh? Men'eki Gakkai kaishi = Japanese journal of clinical immunology		Nihon Rinsho Men'eki Gakkai kaishi = Japanese journal of clinical immunology	Japanese Journal of Clinical Immunology			09114300	13497413	1	1	1	1	0	1	0	0	0
JCRPE Journal of Clinical Research in Pediatric Endocrinology	Journal of clinical research in pediatric endocrinology	Journal of Clinical Research in Pediatric Endocrinology	Journal of clinical research in pediatric endocrinology	JCRPE Journal of Clinical Research in Pediatric Endocrinology			13085727	13085735	1	1	1	1	1	1	0	0	1
JK Practitioner			JK practitioner : a journal of current clinical medicine & surgery	JK Practitioner			09718834		1	1	1	0	0	1	0	0	1
Journal of Antivirals and Antiretrovirals			Journal of antivirals & antiretrovirals	Journal of Antivirals and Antiretrovirals			19485964	19485964	1	1	1	0	0	1	0	0	1
Journal of Cachexia, Sarcopenia and Muscle		Journal of Cachexia, Sarcopenia and Muscle	Journal of cachexia, sarcopenia and muscle	Journal of Cachexia, Sarcopenia and Muscle			21905991	21906009	1	1	1	0	1	1	0	0	1
Journal of Cancer Science and Therapy			Journal of cancer science & therapy	Journal of Cancer Science and Therapy			19485956	19485956	1	1	1	0	0	1	0	0	1
Journal of Clinical Biochemistry and Nutrition		Journal of Clinical Biochemistry and Nutrition	Journal of clinical biochemistry and nutrition	Journal of Clinical Biochemistry and Nutrition		J CLIN BIOCHEM NUTR	09120009	18805086	1	1	1	0	1	1	0	1	1	2.245
Journal of Clinical Investigation	The Journal of clinical investigation	The Journal of Clinical Investigation	The Journal of clinical investigation	Journal of Clinical Investigation		J CLIN INVEST	00219738	15588238	1	1	1	1	1	1	0	1	1	12.812
Journal of Gastric Cancer		Journal of Gastric Cancer	Journal of gastric cancer	Journal of Gastric Cancer			2093582X	20935641	1	1	1	0	1	1	0	0	1
Journal of Ginseng Research		Journal of Ginseng Research	Journal of ginseng research	Journal of Ginseng Research		J GINSENG RES	12268453	20934947	1	1	1	0	1	1	0	1	1	2.259
Journal of Health, Population and Nutrition	Journal of health, population, and nutrition	Journal of Health, Population, and Nutrition	Journal of health, population, and nutrition	Journal of health, population, and nutrition		J HEALTH POPUL NUTR	16060997	20721315	1	1	1	1	1	1	0	1	1	1.121
Journal of International Medical Research	The Journal of international medical research		The Journal of international medical research	Journal of International Medical Research		J INT MED RES	03000605	14732300	1	1	1	1	0	1	0	1	1	0.958
Journal of Neurogastroenterology and Motility		Journal of Neurogastroenterology and Motility	Journal of neurogastroenterology and motility	Journal of Neurogastroenterology and Motility			20930879	20930887	1	1	1	0	1	1	0	0	1
Journal of Pharmaceutical Sciences and Research				Journal of Pharmaceutical Sciences and Research			09751459		1	1	1	0	0	0	0	0	1
Journal of Receptor, Ligand and Channel Research			Journal of receptor, ligand and channel research	Journal of Receptor, Ligand and Channel Research			1178699X	1178699X	1	1	1	0	0	1	0	0	1
Journal of Spectroscopy				Journal of Spectroscopy			23144920	23144939	1	1	1	0	0	0	0	0	1
Journal of Surgical Technique and Case Report		Journal of Surgical Technique and Case Report	Journal of surgical technique and case report	Journal of Surgical Technique and Case Report			20068808	09762825	1	1	1	0	1	1	0	0	1
Journal, Indian Academy of Clinical Medicine				Journal, Indian Academy of Clinical Medicine			09723560		1	1	1	0	0	0	0	0	1
Journal of the Society of Laparoendoscopic Surgeons	JSLS : Journal of the Society of Laparoendoscopic Surgeons / Society of Laparoendoscopic Surgeons	JSLS : Journal of the Society of Laparoendoscopic Surgeons	JSLS : Journal of the Society of Laparoendoscopic Surgeons / Society of Laparoendoscopic Surgeons	JSLS : Journal of the Society of Laparoendoscopic Surgeons / Society of Laparoendoscopic Surgeons		JSLS-J SOC LAPAROEND	10868089	19383797	1	1	1	1	1	1	0	1	1	0.814
Kathmandu University medical journal (KUMJ)	Kathmandu University medical journal (KUMJ)		Kathmandu University medical journal (KUMJ)	Kathmandu University Medical Journal			18122027	48122078	1	1	1	1	0	1	0	0	1
Kobe Journal of Medical Sciences	The Kobe journal of medical sciences		The Kobe journal of medical sciences	Kobe Journal of Medical Sciences			00232513	18830498	1	1	1	1	0	1	0	0	1
Korean Circulation Journal		Korean Circulation Journal	Korean circulation journal	Korean Circulation Journal			17385520	17385555	1	1	1	0	1	1	0	0	1
Korean Journal of Anesthesiology		Korean Journal of Anesthesiology	Korean journal of anesthesiology	Korean Journal of Anesthesiology			20056419	20057563	1	1	1	0	1	1	0	0	0
Korean journal of ophthalmology : KJO	Korean journal of ophthalmology : KJO	Korean Journal of Ophthalmology : KJO	Korean journal of ophthalmology : KJO	Korean journal of ophthalmology : KJO			10118942		1	1	1	1	1	1	0	0	1
Korean Journal of Pain		The Korean Journal of Pain	The Korean journal of pain	Korean Journal of Pain			20059159	20930569	1	1	1	0	1	1	0	0	1
Libyan Journal of Medicine	The Libyan journal of medicine	The Libyan Journal of Medicine	The Libyan journal of medicine	Libyan Journal of Medicine		LIBYAN J MED	19932820	18196357	1	1	1	1	1	1	0	1	1	0.585
Medical Science Monitor	Medical science monitor : international medical journal of experimental and clinical research	Medical Science Monitor : International Medical Journal of Experimental and Clinical Research	Medical science monitor : international medical journal of experimental and clinical research	Medical Science Monitor		MED SCI MONITOR	12341010	16433750	1	1	1	1	1	1	0	1	1	1.358
Medical science monitor basic research	Medical science monitor basic research	Medical Science Monitor Basic Research	Medical science monitor basic research	Medical science monitor basic research			23254394	23254416	1	1	1	1	1	1	0	0	1
Medicina (Kaunas, Lithuania)	Medicina (Kaunas, Lithuania)		Medicina (Kaunas, Lithuania)	Medicina (Kaunas, Lithuania)		MED LITH	1010660X	16489144	1	1	1	1	0	1	0	1	0	0.55
Medicina Oral, Patologia Oral y Cirugia Bucal	Medicina oral, patología oral y cirugía bucal	Medicina Oral, Patolog&#x000ed;a Oral y Cirug&#x000ed;a Bucal	Medicina oral, patologia oral y cirugia bucal	Medicina Oral, Patologia Oral y Cirugia Bucal		MED ORAL PATOL ORAL	16984447	16986946	1	1	1	1	1	1	0	1	1	1.017
NeuroImage: Clinical		NeuroImage : Clinical	NeuroImage. Clinical	NeuroImage: Clinical			22131582	22131582	1	1	1	0	1	1	0	0	1
Nuclear Receptor Signaling	Nuclear receptor signaling	Nuclear Receptor Signaling	Nuclear receptor signaling	Nuclear receptor signaling			15507629	15507629	1	1	1	1	1	1	0	0	1
Oncologist	The oncologist	The Oncologist	The oncologist	Oncologist		ONCOLOGIST	10837159	1549490X	1	1	1	1	1	1	0	1	1	4.095
Oncotarget	Oncotarget	Oncotarget	Oncotarget	Oncotarget		ONCOTARGET	19492553	19492553	1	1	1	1	1	1	0	1	1	6.636
Open Andrology Journal				Open Andrology Journal			1876827X	1876827X	1	1	1	0	0	0	0	0	1
Open Arthritis Journal				Open Arthritis Journal			18765394	18765394	1	1	1	0	0	0	0	0	1
Open Autoimmunity Journal			The Open autoimmunity journal	Open Autoimmunity Journal			18768946	18768946	1	1	1	0	0	1	0	0	1
Open Bioactive Compounds Journal				Open Bioactive Compounds Journal			18748473	18748473	1	1	1	0	0	0	0	0	1
Open Biomarkers Journal			The open biomarkers journal	Open Biomarkers Journal			18753183	18753183	1	1	1	0	0	1	0	0	1
Open Biotechnology Journal			The open biotechnology journal	Open Biotechnology Journal			18740707	18740707	1	1	1	0	0	1	0	0	1
Open Bone Journal			The Open bone journal	Open Bone Journal			18765254	18765254	1	1	1	0	0	1	0	0	1
Open Cancer Immunology Journal			The Open cancer immunology journal	Open Cancer Immunology Journal			18764010	18764010	1	1	1	0	0	1	0	0	1
Open Cancer Journal			The open cancer journal	Open Cancer Journal			18740790	18740790	1	1	1	0	0	1	0	0	1
Open Cardiovascular Imaging Journal				Open Cardiovascular Imaging Journal			18765386	18765386	1	1	1	0	0	0	0	0	1
Open Chemical and Biomedical Methods Journal				Open Chemical and Biomedical Methods Journal			18750389	18750389	1	1	1	0	0	0	0	0	1
Open Clinical Trials Journal				Open Clinical Trials Journal			18768210	18768210	1	1	1	0	0	0	0	0	1
Open Complementary Medicine Journal			The open complementary medicine journal	Open Complementary Medicine Journal			1876391X	1876391X	1	1	1	0	0	1	0	0	1
Open Genomics Journal			The open genomics journal	Open Genomics Journal			1875693X	1875693X	1	1	1	0	0	1	0	0	1
Open Medicinal Chemistry Journal		The Open Medicinal Chemistry Journal	The open medicinal chemistry journal	Open Medicinal Chemistry Journal			18741045	18741045	1	1	1	0	1	1	0	0	1
Open Natural Products Journal				Open Natural Products Journal			18748481	18748481	1	1	1	0	0	0	0	0	1
Open Neurosurgery Journal				Open Neurosurgery Journal			18765297	18765297	1	1	1	0	0	0	0	0	1
Open Pharmacoeconomics and Health Economics Journal				Open Pharmacoeconomics and Health Economics Journal				18768245	1	1	1	0	0	0	0	0	1
Open Prostate Cancer Journal			The open prostate cancer journal	Open Prostate Cancer Journal			18768229	18768229	1	1	1	0	0	1	0	0	1
Open Proteomics Journal			The open proteomics journal	Open Proteomics Journal			18750397	18750397	1	1	1	0	0	1	0	0	1
Open Stem Cell Journal			The open stem cell journal	Open Stem Cell Journal			18768938	18768938	1	1	1	0	0	1	0	0	1
Open Toxicology Journal				Open Toxicology Journal			18743404	18743404	1	1	1	0	0	0	0	0	1
Open Toxinology Journal			The open toxinology journal	Open Toxinology Journal			18754147	18754147	1	1	1	0	0	1	0	0	1
Open Transplantation Journal				Open Transplantation Journal			18744184	18744184	1	1	1	0	0	0	0	0	1
Open Tropical Medicine Journal			The open tropical medicine journal	Open Tropical Medicine Journal			18743153	18743153	1	1	1	0	0	1	0	0	1
Open Vaccine Journal			The open vaccine journal	Open Vaccine Journal			18750354	18750354	1	1	1	0	0	1	0	0	1
Parasite	Parasite (Paris, France)	Parasite	Parasite (Paris, France)	Parasite (Paris, France)		PARASITE	1252607X	17761042	1	1	1	1	1	1	0	1	1	1.116
PLoS Currents		PLoS Currents	PLoS currents	PLoS Currents			21573999	21573999	1	1	1	0	1	1	0	0	1
Postepy Dermatologii I Alergologii		Advances in Dermatology and Allergology/Post&#x00229;py Dermatologii i Alergologii	Postepy dermatologii i alergologii	Postepy Dermatologii i Alergologii		POSTEP DERM ALERGOL	1642395X	22990046	1	1	1	0	1	1	0	1	0	0.664
Protein & Cell	Protein & cell	Protein &#x0026; Cell	Protein & cell	Protein and Cell		PROTEIN CELL	1674800X	16748018	1	1	1	1	1	1	0	1	1	3.22
Proteomics Insights			Proteomic insights	Proteomics Insights			11786418	11786418	1	1	1	0	0	1	0	0	1
Psychiatry Investigation		Psychiatry Investigation	Psychiatry investigation	Psychiatry Investigation		PSYCHIAT INVEST	17383684	19763026	1	1	1	0	1	1	0	1	1	1.055
Radiation Oncology Journal		Radiation Oncology Journal	Radiation oncology journal	Radiation Oncology Journal			22341900	22343164	1	1	1	0	1	1	0	0	1
Reproductive Biology Insights				Reproductive Biology Insights			11786426	11786426	1	1	1	0	0	0	0	0	1
Research Journal of Immunology				Research Journal of Immunology			19947909	20772211	1	1	1	0	0	0	0	0	1
Research Journal of Obstetrics and Gynecology				Research Journal of Obstetrics and Gynecology			19947925	2077222X	1	1	1	0	0	0	0	0	1
Revista Portuguesa de Pneumologia	Revista portuguesa de pneumologia		Revista portuguesa de pneumologia	Revista Portuguesa de Pneumologia		REV PORT PNEUMOL	08732159	08732159	1	1	1	1	0	1	0	1	0	0.562
Safety and Health at Work		Safety and Health at Work	Safety and health at work	Safety and Health at Work			20937911	20937997	1	1	1	0	1	1	0	0	1
Sao Paulo Medical Journal	São Paulo medical journal = Revista paulista de medicina		Sao Paulo medical journal = Revista paulista de medicina	Sao Paulo Medical Journal		SAO PAULO MED J	15163180	18069460	1	1	1	1	0	1	0	1	1	0.588
Seton Hall law review	Seton Hall law review		Seton Hall law review	Seton Hall law review			05865964		1	1	1	1	0	1	0	0	1
Singapore Medical Journal	Singapore medical journal		Singapore medical journal	Singapore Medical Journal		SINGAP MED J	00375675	00375675	1	1	1	1	0	1	0	1	1	0.63
Stem Cell Reports		Stem Cell Reports	Stem cell reports	Stem Cell Reports			22136711	22136711	1	1	1	0	1	1	0	0	1
The Iowa orthopaedic journal	The Iowa orthopaedic journal	The Iowa Orthopaedic Journal	The Iowa orthopaedic journal	The Iowa orthopaedic journal			15415457	15551377	1	1	1	1	1	1	0	0	1
New York State Dental Journal	The New York state dental journal		The New York state dental journal	The New York state dental journal			00287571		1	1	1	1	0	1	0	0	1
Physiologist	The Physiologist		The Physiologist	The Physiologist			00319376		1	1	1	1	0	1	0	0	1
Toxicology International		Toxicology International	Toxicology international	Toxicology International			09716580	09765131	1	1	1	0	1	1	0	0	1
Turk Dermatoloji Dergisi				Turk Dermatoloji Dergisi			13077635	13085255	1	1	1	0	0	0	0	0	0
Turkish Journal of Pediatrics	The Turkish journal of pediatrics		The Turkish journal of pediatrics	Turkish Journal of Pediatrics		TURKISH J PEDIATR	00414301	00414301	1	1	1	1	0	1	0	1	1	0.558
Journal of Dental Biomechanics		Journal of Dental Biomechanics	Journal of dental biomechanics		Journal of Dental Biomechanics		17587360	17587360	1	0	1	0	1	1	1	0	1
Animals					Animals		20762615	20762615	1	0	1	0	0	0	1	0	1
Brazilian Journal of Veterinary Research and Animal Science					Brazilian Journal of Veterinary Research and Animal Science		14139596	16784456	1	0	1	0	0	0	1	0	1
Ciencia Animal Brasileira					CiÃªncia Animal Brasileira		15182797	18096891	1	0	1	0	0	0	1	0	1
Revista Mexicana De Ciencias Pecuarias					Revista Mexicana de Ciencias Pecuarias	REV MEX CIENC PECU	20071124	20071124	1	0	1	0	0	0	1	1	0	0.31
Archivos de Medicina Veterinaria					Archivos de Medicina Veterinaria	ARCH MED VET	0301732X	07176201	1	0	1	0	0	0	1	1	1	0.354
Arquivo Brasileiro de Medicina Veterinaria e Zootecnia					Arquivo Brasileiro de Medicina VeterinÃ¡ria e Zootecnia	ARQ BRAS MED VET ZOO	01020935	16784162	1	0	1	0	0	0	1	1	1	0.269
Ciencia e Agrotecnologia					CiÃªncia e Agrotecnologia	CIENC AGROTEC	14137054	19811829	1	0	1	0	0	0	1	1	1	0.395
Ciencia Rural					CiÃªncia Rural	CIENC RURAL	01038478	16784596	1	0	1	0	0	0	1	1	1	0.383
International Journal of Poultry Science					International Journal of Poultry Science		16828356	19947992	1	0	1	0	0	0	1	0	1
Journal of Animal and Veterinary Advances					Journal of Animal and Veterinary Advances	J ANIM VET ADV	16805593	1993601X	1	0	1	0	0	0	1	1	1	0.365
Pesquisa Veterinaria Brasileira					Pesquisa VeterinÃ¡ria Brasileira	PESQUISA VET BRASIL	0100736X	16785150	1	0	1	0	0	0	1	1	1	0.538
Revista Cientifica de la Facultad de Ciencias Veterinarias de la Universidad del Zulia					Revista CientÃ­fica	REV CIENT-FAC CIEN V	07982259	07982259	1	0	1	0	0	0	1	1	1	0.139
Revista Colombiana de Ciencias Pecuarias					Revista Colombiana de Ciencias Pecuarias	REV COLOMB CIENC PEC	01200690	01200690	1	0	1	0	0	0	1	1	1	0.202
Veterinaria Mexico					Veterinaria Mexico	VET MEXICO	03015092	03015092	1	0	1	0	0	0	1	1	1	0.17
Veterinary World					Veterinary World		09728988	22310916	1	0	1	0	0	0	1	0	1
Acta Veterinaria Brno			Acta veterinaria		Acta Veterinaria Brno	ACTA VET BRNO	00017213	18017576	1	0	1	0	0	1	1	1	1	0.393
Veterinarni Medicina			Veterinarni medicina		VeterinÃ¡rnÃ­ MedicÃ­na	VET MED-CZECH	03758427	18059392	1	0	1	0	0	1	1	1	1	0.679
Journal of the South African Veterinary Association	Journal of the South African Veterinary Association		Journal of the South African Veterinary Association	Journal of the South African Veterinary Association	Journal of the South African Veterinary Association	J S AFR VET ASSOC	10199128	22249435	1	1	1	1	0	1	1	1	1	0.273
Malaysian Journal of Microbiology					Malaysian Journal of Microbiology		18238268	22317538	1	0	1	0	0	0	1	0	1
Kasmera					Kasmera	KASMERA	00755222	00755222	1	0	1	0	0	0	1	1	1	0.071
Journal of Punjab Academy of Forensic Medicine and Toxicology					Journal of Punjab Academy of Forensic Medicine and Toxicology		09725687	0974083X	1	0	1	0	0	0	1	0	1
Revista Ceres					Revista Ceres		0034737X	21773491	1	0	1	0	0	0	1	0	1
Biotechnology					Biotechnology		1682296X	16822978	1	0	1	0	0	0	1	0	1
AgBioForum					AgBioforum		1522936X		1	0	1	0	0	0	1	0	1
Food Technology and Biotechnology					Food Technology and Biotechnology	FOOD TECHNOL BIOTECH	13309862	13342606	1	0	1	0	0	0	1	1	1	0.977
Mljekarstvo					Mljekarstvo	MLJEKARSTVO	0026704X	18464025	1	0	1	0	0	0	1	1	1	0.3
Plant Biotechnology					Plant Biotechnology	PLANT BIOTECHNOL-NAR	13424580	13476114	1	0	1	0	0	0	1	1	1	0.935
Journal of Cell and Molecular Biology					Journal of Cell and Molecular Biology		13033646	13060961	1	0	1	0	0	0	1	0	1
Acta Bioquimica Clinica Latinoamericana					Acta BioquÃ­mica ClÃ­nica Latinoamericana	ACTA BIOQUIM CLIN L	03252957	18516114	1	0	1	0	0	0	1	1	0	0.093
Chem-Bio Informatics Journal					Chem-Bio Informatics Journal		13476297	13470442	1	0	1	0	0	0	1	0	1
Internet Electronic Journal of Molecular Design					Internet Electronic Journal of Molecular Design		15386414		1	0	1	0	0	0	1	0	1
Revista Cubana de Cirugia					Revista Cubana de CirugÃ­a		15612945	15612945	1	0	1	0	0	0	1	0	0
Acta Universitatis Palackianae Olomucensis, Gymnica					Acta Universitatis Palackianae Olomucensis : Gymnica		12121185	12138312	1	0	1	0	0	0	1	0	1
Archives of Budo					Archives of Budo	ARCH BUDO	16438698	16438698	1	0	1	0	0	0	1	1	1	0.885
Archives of Razi Institute					Archives of Razi Institute		03653439	20089872	1	0	1	0	0	0	1	0	1
Bulgarian Journal of Veterinary Medicine					Bulgarian Journal of Veterinary Medicine		13111477	13133543	1	0	1	0	0	0	1	0	1
Cultura, Ciencia y Deporte					Cultura, Ciencia y Deporte		16965043	19897413	1	0	1	0	0	0	1	0	1
Cumhuriyet Dental Journal					Cumhuriyet Dental Journal		21462852		1	0	1	0	0	0	1	0	1
Education and Health					Education and Health		02651602	20493665	1	0	1	0	0	0	1	0	1
Electronic Journal of Health Informatics					Electronic Journal of Health Informatics		14464381		1	0	1	0	0	0	1	0	1
EurAsian Journal of BioSciences					EurAsian Journal of Biosciences		13079867		1	0	1	0	0	0	1	0	1
Ido Movement for Culture					Ido Movement for Culture : Journal of Martial Arts Anthropology		20843763	20827571	1	0	1	0	0	0	1	0	1
Insuficiencia Cardiaca					Insuficiencia Cardiaca		18501044	18523862	1	0	1	0	0	0	1	0	0
International Journal Bioautomotion					International Journal Bioautomation		13141902	13142321	1	0	1	0	0	0	1	0	1
Journal of Lasers in Medical Sciences					Journal of Lasers in Medical Sciences		20089783	22286721	1	0	1	0	0	0	1	0	1
Journal of Military Medicine					Journal of Military Medicine		17351537	17357667	1	0	1	0	0	0	1	0	1
Journal of Osseointegration					Journal of Osseointegration		2036413X	20364121	1	0	1	0	0	0	1	0	1
Journal of Special Education and Rehabilitation					Journal of Special Education and Rehabilitation		14096099	1857663X	1	0	1	0	0	0	1	0	1
Mass Spectrometry Letters					Mass Spectrometry Letters		22334203	20938950	1	0	1	0	0	0	1	0	1
Maydica					Maydica	MAYDICA	00256153	22798013	1	0	1	0	0	0	1	1	1	0.368
Motriz. Revista de Educacao Fisica					Motriz : Revista de Educacao Fisica	MOTRIZ	19806574	19806574	1	0	1	0	0	0	1	1	1	0.086
Neuropsychological Trends					Neuropsychological Trends		1970321X	19703201	1	0	1	0	0	0	1	0	1
Nurture					Nurture		19941625	19941633	1	0	1	0	0	0	1	0	1
Palliative Care					Palliative Care : Research and Treatment		11782242		1	0	1	0	0	0	1	0	1
Revista Ambiente e Agua					Ambiente e Ãgua : An Interdisciplinary Journal of Applied Science		1980993X		1	0	1	0	0	0	1	0	1
Revista Andaluza de Medicina del Deporte					Revista Andaluza de Medicina del Deporte		18887546	21725063	1	0	1	0	0	0	1	0	1
Revista Brasileira de Ciencias do Esporte					Revista Brasileira de CiÃªncias do Esporte		01013289	21793255	1	0	1	0	0	0	1	0	1
Revista Brasileira de Cineantropometria e Desempenho Humano					Revista Brasileira de Cineantropometria e Desempenho Humano		14158426	19800037	1	0	1	0	0	0	1	0	0
Revista Brasileira de Crescimento e Desenvolvimento Humano					Revista Brasileira de Crescimento e Desenvolvimento Humano		01041282	21753598	1	0	1	0	0	0	1	0	0
Revista Electronica de Veterinaria					REDVET		16957504		1	0	1	0	0	0	1	0	1
Shanghai Archives of Psychiatry					Shanghai Archives of Psychiatry		10020829		1	0	1	0	0	0	1	0	1
Turkish Nephrology, Dialysis and Transplantation Journal					The Turkish Nephrology, Dialysis and Transplantation Journal		13007718		1	0	1	0	0	0	1	0	1
Water (Switzerland)					Water	WATER-SUI	20734441	20734441	1	0	1	0	0	0	1	1	1	0.973
Acta Endocrinologica					Acta Endocrinologica (Bucharest)	ACTA ENDOCRINOL-BUCH	18410987	1843066X	1	0	1	0	0	0	1	1	1	0.45
Food Science and Technology					CiÃªncia e Tecnologia de Alimentos	CIENCIA TECNOL ALIME	01012061	1678457X	1	0	1	0	0	0	1	1	1	0.326
ACIMED					ACIMED		10249435	15612880	1	0	1	0	0	0	1	0	0
Acta Facultatis Pharmaceuticae Universitatis Comenianae					Acta Facultatis Pharmaceuticae Universitatis Comenianae		03012298	13386786	1	0	1	0	0	0	1	0	1
Acta Paulista de Enfermagem					Acta Paulista de Enfermagem	ACTA PAUL ENFERM	01032100	19820194	1	0	1	0	0	0	1	1	0	0.142
Acta Scientiae Veterinariae					Acta Scientiae Veterinariae	ACTA SCI VET	16780345	16799216	1	0	1	0	0	0	1	1	0	0.273
Advances in Natural and Applied Sciences					Advances in Natural and Applied Sciences		19950772	19981090	1	0	1	0	0	0	1	0	1
African Journal of Biotechnology					African Journal of Biotechnology		16845315		1	0	1	0	0	0	1	0	1
Agora					Ãgora		15161498		1	0	1	0	0	0	1	0	0
American Journal of Animal and Veterinary Sciences					American Journal of Animal and Veterinary Sciences		15574555	15574563	1	0	1	0	0	0	1	0	1
American Journal of Plant Physiology					American Journal of Plant Physiology		15574539	15574547	1	0	1	0	0	0	1	0	1
Animal Science Papers and Reports					Animal Science Papers and Reports	ANIM SCI PAP REP	08604037	08604037	1	0	1	0	0	0	1	1	1	0.918
Aquichan					Aquichan	AQUICHAN	16575997	20275374	1	0	1	0	0	0	1	1	1	0.027
Archives of Biological Sciences					Archives of Biological Sciences	ARCH BIOL SCI	03544664	18214339	1	0	1	0	0	0	1	1	1	0.791
Archives of Veterinary Science					Archives of Veterinary Science		1517784X		1	0	1	0	0	0	1	0	1
Arthropod Systematics and Phylogeny					Arthropod Systematics & Phylogeny	ARTHROPOD SYST PHYLO	18637221	18648312	1	0	1	0	0	0	1	1	1	2.318
Asian Journal of Clinical Nutrition					Asian Journal of Clinical Nutrition		19921470	20772033	1	0	1	0	0	0	1	0	1
Australasian Journal of Disaster and Trauma Studies					Australasian Journal of Disaster and Trauma Studies		11744707		1	0	1	0	0	0	1	0	1
Australian Journal of Emergency Management					Australian Journal of Emergency Management		13241540		1	0	1	0	0	0	1	0	1
Biotechnology, Agronomy and Society and Environment					Biotechnologie, Agronomie, SociÃ©tÃ© et Environnement	BIOTECHNOL AGRON SOC	13706233	17804507	1	0	1	0	0	0	1	1	1	0.379
Biotropia					BIOTROPIA : the Southeast Asian Journal of Tropical Biology		02156334	1907770X	1	0	1	0	0	0	1	0	1
Brazilian Journal of Oral Sciences					Brazilian Journal of Oral Sciences		16773217	16773225	1	0	1	0	0	0	1	0	1
Brunei International Medical Journal					Brunei International Medical Journal		15605876	20793146	1	0	1	0	0	0	1	0	1
Chemical and Biochemical Engineering Quarterly					Chemical and Biochemical Engineering Quarterly	CHEM BIOCHEM ENG Q	03529568	18465153	1	0	1	0	0	0	1	1	1	0.569
Ciencia y Enfermeria					Ciencia y EnfermerÃ­a : Revista Iberoamericana de InvestigacÃ­on		07172079	07179553	1	0	1	0	0	0	1	0	1
Cirugia Plastica Ibero-Latinoamericana					CirugÃ­a PlÃ¡stica Ibero-Latinoamericana		03767892	19892055	1	0	1	0	0	0	1	0	0
Coluna/ Columna					Coluna/Columna		18081851	2177014X	1	0	1	0	0	0	1	0	1
Crop Breeding and Applied Biotechnology					Crop Breeding and Applied Biotechnology	CROP BREED APPL BIOT	19847033	19847033	1	0	1	0	0	0	1	1	1	0.524
Cuadernos de Medicina Forense					Cuadernos de Medicina Forense		11357606		1	0	1	0	0	0	1	0	0
Czech Journal of Genetics and Plant Breeding					Czech Journal of Genetics and Plant Breeding	CZECH J GENET PLANT	12121975	18059325	1	0	1	0	0	0	1	1	1	0.385
Deutsches Arzteblatt					Deutsches Ã?rzteblatt		00121207		1	0	1	0	0	0	1	0	1
e-Journal of Surface Science and Nanotechnology					E-Journal of Surface Science and Nanotechnology		13480391		1	0	1	0	0	0	1	0	1
Early Childhood Research and Practice					Early Childhood Research & Practice		15245039		1	0	1	0	0	0	1	0	1
Educacion Medica					EducaciÃ³n MÃ©dica		15751813	15792099	1	0	1	0	0	0	1	0	1
Emirates Journal of Food and Agriculture					Emirates Journal of Food and Agriculture		2079052X	20790538	1	0	1	0	0	0	1	0	1
Enfermeria Global					EnfermerÃ­a Global		16956141		1	0	1	0	0	0	1	0	1
EnvironmentAsia					EnvironmentAsia		19061714		1	0	1	0	0	0	1	0	1
Eurasian Journal of Medicine					Eurasian Journal of Medicine		13088734	13088742	1	0	1	0	0	0	1	0	1
EuroMediterranean Biomedical Journal					Euromediterranean Biomedical Journal		22797165		1	0	1	0	0	0	1	0	1
Gulhane Medical Journal					Gulhane Medical Journal		13020471		1	0	1	0	0	0	1	0	1
HAYAT					Hayat Journal of Faculty of Nursing & Midwifery		17352215	2008188X	1	0	1	0	0	0	1	0	0
Health SA Gesondheid					Health SA Gesondheid : Journal of Interdisciplinary Health Sciences		10259848	20719736	1	0	1	0	0	0	1	0	1
Hrvatska Revija Za Rehabilitacijska Istrazivanja					Croatian Review of Rehabilitation Research		13313010		1	0	1	0	0	0	1	0	1
Human and Veterinary Medicine					Human & Veterinary Medicine		20667655	20667663	1	0	1	0	0	0	1	0	1
Human Movement					Human Movement		17323991	18991955	1	0	1	0	0	0	1	0	1
Image Analysis and Stereology					Image Analysis and Stereology	IMAGE ANAL STEREOL	15803139	18545165	1	0	1	0	0	0	1	1	1	0.639
Index de Enfermeria					Index de EnfermerÃ­a		11321296		1	0	1	0	0	0	1	0	0
Indian Journal of Chemistry - Section B Organic and Medicinal Chemistry					Indian Journal of Chemistry : Section B	INDIAN J CHEM B	03764699	09750983	1	0	1	0	0	0	1	1	1	0.689
Indian Journal of Community Health					Indian Journal of Community Health		09717587	22489509	1	0	1	0	0	0	1	0	1
Indian Journal of Traditional Knowledge					Indian Journal of Traditional Knowledge	INDIAN J TRADIT KNOW	09725938	09751068	1	0	1	0	0	0	1	1	1	0.492
International Journal of Collaborative Research on Internal Medicine and Public Health					International Journal of Collaborative Research on Internal Medicine & Public Health		18404529		1	0	1	0	0	0	1	0	1
International Journal of Dream Research					International Journal of Dream Research		18667953		1	0	1	0	0	0	1	0	1
International Journal of High Dilution Research					International Journal of High Dilution Research		19826206		1	0	1	0	0	0	1	0	1
International Journal of Morphology					International Journal of Morphology	INT J MORPHOL	07179367	07179502	1	0	1	0	0	0	1	1	1	0.213
International Journal of Psychosocial Rehabilitation					International Journal of Psychosocial Rehabilitation		14757192		1	0	1	0	0	0	1	0	1
International Journal of Wine Research					International Journal of Wine Research		11791403		1	0	1	0	0	0	1	0	1
International Medical Journal Malaysia					International Medical Journal Malaysia		18234631		1	0	1	0	0	0	1	0	1
Iranian Journal of Pathology					Iranian Journal of Pathology		17355303		1	0	1	0	0	0	1	0	1
Iraqi Journal of Veterinary Sciences					Iraqi Journal of Veterinary Sciences		16073894	20711255	1	0	1	0	0	0	1	0	1
Israel Journal of Veterinary Medicine					Israel Journal of Veterinary Medicine	ISR J VET MED	03349152	03349152	1	0	1	0	0	0	1	1	1	0.18
Jornal Brasileiro de Patologia e Medicina Laboratorial					Jornal Brasileiro de Patologia e Medicina Laboratorial		16762444	16784774	1	0	1	0	0	0	1	0	1
Journal für Ernahrungsmedizin					Journal fÃ¼r ErnÃ¤hrungsmedizin		15632873	16809432	1	0	1	0	0	0	1	0	0
Journal of Biological Research					Journal of Biological Research	J BIOL RES-THESSALON	1790045X	22415793	1	0	1	0	0	0	1	1	1	0.618
Journal of Human Sport and Exercise					Journal of Human Sport and Exercise		19885202		1	0	1	0	0	0	1	0	1
Journal of International Dental and Medical Research					Journal of International Dental and Medical Research		1309100X		1	0	1	0	0	0	1	0	1
Journal of Thermodynamics					Journal of Thermodynamics		16879244	16879252	1	0	1	0	0	0	1	0	1
Kafkas Universitesi Veteriner Fakultesi Dergisi					Kafkas Universitesi Veteriner Fakultesi Dergisi	KAFKAS UNIV VET FAK	13006045	13092251	1	0	1	0	0	0	1	1	1	0.458
Malaysian Family Physician					Malaysian Family Physician		1985207X	19852274	1	0	1	0	0	0	1	0	1
Nutricion Clinica y Dietetica Hospitalaria					NutriciÃ³n ClÃ­nica y DietÃ©tica Hospitalaria		02116057	1989208X	1	0	1	0	0	0	1	0	1
O Mundo da Saude					O Mundo da SaÃºde		01047809	19803990	1	0	1	0	0	0	1	0	0
Online Brazilian Journal of Nursing					Online Brazilian Journal of Nursing		16764285		1	0	1	0	0	0	1	0	1
Online Journal of Nursing Informatics					Online Journal of Nursing Informatics		10899758		1	0	1	0	0	0	1	0	1
Oriental Journal of Chemistry					Oriental Journal of Chemistry		0970020X	22315039	1	0	1	0	0	0	1	0	1
Pakistan Veterinary Journal					Pakistan Veterinary Journal	PAK VET J	02538318	20747764	1	0	1	0	0	0	1	1	1	1.365
Pediatria de Atencion Primaria					Revista PediatrÃ­a de AtenciÃ³n Primaria		11397632	21744106	1	0	1	0	0	0	1	0	0
Plant Tissue Culture and Biotechnology					Plant Tissue Culture & Biotechnology		18173721	18188745	1	0	1	0	0	0	1	0	1
Planta Daninha					Planta Daninha		01008358		1	0	1	0	0	0	1	0	1
Polish Journal of Chemical Technology					Polish Journal of Chemical Technology	POL J CHEM TECHNOL	15098117	18994741	1	0	1	0	0	0	1	1	1	0.444
Psicologia Clinica					Psicologia ClÃ­nica		01035665	19805438	1	0	1	0	0	0	1	0	0
Radiologia Brasileira					Radiologia Brasileira		01003984	16787099	1	0	1	0	0	0	1	0	0
Rasayan Journal of Chemistry					Rasayan Journal of Chemistry		09741496		1	0	1	0	0	0	1	0	1
Revista Brasileira de Ortopedia					Revista Brasileira de Ortopedia		01023616	19824378	1	0	1	0	0	0	1	0	0
Revista Brasileira de Saude Materno Infantil					Revista Brasileira de SaÃºde Materno Infantil		15193829	18069304	1	0	1	0	0	0	1	0	1
Revista Chilena de Cirugia					Revista Chilena de CirugÃ­a	REV CHIL CIR	07184026	07184026	1	0	1	0	0	0	1	1	0	0.075
Revista Chilena de Enfermedades Respiratorias					Revista Chilena de Enfermedades Respiratorias		07175698	07177348	1	0	1	0	0	0	1	0	0
Revista Chilena de Neuro-Psiquiatria					Revista Chilena de Neuro-PsiquiatrÃ­a		00347388	07179227	1	0	1	0	0	0	1	0	0
Revista Chilena de Radiologia					Revista Chilena de RadiologÃ­a		0717201X	07179308	1	0	1	0	0	0	1	0	0
Revista Ciencias de la Salud					Revista Ciencias de la Salud		16927273		1	0	1	0	0	0	1	0	0
Revista Colombiana de Gastroenterologia					Revista Colombiana de GastroenterologÃ­a		01209957		1	0	1	0	0	0	1	0	1
Revista Cubana de Educacion Medica Superior					EducaciÃ³n MÃ©dica Superior		08642141	15612902	1	0	1	0	0	0	1	0	0
Revista Cubana de Higiene y Epidemiologia					Revista Cubana de Higiene y EpidemiologÃ­a		02531151	15613003	1	0	1	0	0	0	1	0	0
Revista Cubana de Investigaciones Biomedicas					Revista Cubana de Investigaciones BiomÃ©dicas		08640300	15613011	1	0	1	0	0	0	1	0	0
Revista Cubana de Medicina General Integral					Revista Cubana de Medicina General Integral		08642125	15613038	1	0	1	0	0	0	1	0	0
Revista Cubana de Medicina Militar					Revista Cubana de Medicina Militar		01386557	15613046	1	0	1	0	0	0	1	0	0
Revista Cubana de Obstetricia y Ginecologia					Revista Cubana de Obstetricia y GinecologÃ­a		0138600X	15613062	1	0	1	0	0	0	1	0	0
Revista Cubana de Ortopedia y Traumatologia					Revista Cubana de Ortopedia y TraumatologÃ­a		0864215X	15613100	1	0	1	0	0	0	1	0	0
Revista Cubana de Plantas Medicinales					Revista Cubana de Plantas Medicinales		10284796		1	0	1	0	0	0	1	0	1
Revista Cubana de Salud Publica					Revista Cubana de Salud PÃºblica		08643466	15613127	1	0	1	0	0	0	1	0	0
Revista da Educacao Fisica					Revista da EducaÃ§Ã£o FÃ­sica/UEM		01033948	19833083	1	0	1	0	0	0	1	0	0
Revista de Investigaciones Veterinarias del Peru					Revista de Investigaciones Veterinarias del PerÃº		16823419	16099117	1	0	1	0	0	0	1	0	0
Revista de Nutricao					Revista de NutriÃ§Ã£o	REV NUTR	14155273	16789865	1	0	1	0	0	0	1	1	1	0.28
Revista Espanola de Cirugia Oral y Maxilofacial					Revista EspaÃ±ola de CirugÃ­a Oral y Maxilofacial		11300558	21739161	1	0	1	0	0	0	1	0	1
Revista Fitotecnia Mexicana					Revista Fitotecnia Mexicana	REV FITOTEC MEX	01877380	01877380	1	0	1	0	0	0	1	1	1	0.264
Revista Gerencia y Politicas de Salud					Revista Gerencia y PolÃ­ticas de Salud		16577027		1	0	1	0	0	0	1	0	0
Revista Internacional de Medicina y Ciencias de la Actividad Fisica y del Deporte					Revista International de Medicina y Ciencias de la Actividad Fisica y del Deporte	REV INT MED CIENC AC	15770354	15770354	1	0	1	0	0	0	1	1	0	0.205
Revista Latinoamericana de Psicopatologia Fundamental					Revista Latinoamericana de Psicopatologia Fundamental	REV LATINOAM PSICOPA	14154714	19840381	1	0	1	0	0	0	1	1	1	0.013
Revista MVZ Cordoba					Revista Mvz Cordoba	REV MVZ CORDOBA	01220268	19090544	1	0	1	0	0	0	1	1	1	0.182
Revista Odonto Ciencia					Revista Odonto CiÃªncia		01029460	19806523	1	0	1	0	0	0	1	0	1
Rigakuryoho Kagaku					Rigakuryoho Kagaku		13411667		1	0	1	0	0	0	1	0	0
Salud Uninorte					Salud Uninorte		01205552	20117531	1	0	1	0	0	0	1	0	0
Saude e Sociedade					SaÃºde e Sociedade	SAUDE SOC	01041290	19840470	1	0	1	0	0	0	1	1	1	0.231
Scientific Study and Research: Chemistry and Chemical Engineering, Biotechnology, Food Industry					Scientific Study & Research. Chemistry & Chemical Engineering, Biotechnology, Food Industry		1582540X		1	0	1	0	0	0	1	0	1
Sigurnost					Sigurnost		03506886		1	0	1	0	0	0	1	0	1
Studia Universitatis Vasile Goldis Arad, Seria Stiintele Vietii					Studia Universitatis Vasile Goldis : Seria Stiintele Vietii (Life Sciences Series)		15842363	18427863	1	0	1	0	0	0	1	0	1
Studies on Ethno-Medicine					Studies on Ethno-Medicine	STUD ETHNO-MED	09735070	09735070	1	0	1	0	0	0	1	1	1	0.246
Surgical and Cosmetic Dermatology					Surgical & Cosmetic Dermatology		19845510	19848773	1	0	1	0	0	0	1	0	0
Texto e Contexto Enfermagem					Texto & Contexto Enfermagem	TEXTO CONTEXTO ENFER	01040707	1980265X	1	0	1	0	0	0	1	1	1	0.134
Transplantationsmedizin: Organ der Deutschen Transplantationsgesellschaft					Transplantationsmedizin		09469648		1	0	1	0	0	0	1	0	1
Turk Uroloji Dergisi					Turkish Journal of Urology		13005804	13084631	1	0	1	0	0	0	1	0	1
Turkish Journal of Biology					Turkish Journal of Biology	TURK J BIOL	13000152	13036092	1	0	1	0	0	0	1	1	1	0.914
Turkish Journal of Veterinary and Animal Sciences					Turkish Journal of Veterinary and Animal Sciences	TURK J VET ANIM SCI	13000128	13036181	1	0	1	0	0	0	1	1	1	0.221
Water S.A.					Water S.A.	WATER SA	03784738	18167950	1	0	1	0	0	0	1	1	1	0.876
Acta Protozoologica			Acta protozoologica		Acta Protozoologica	ACTA PROTOZOOL	00651583	16890027	1	0	1	0	0	1	1	1	1	0.984
Advances in Virology		Advances in Virology	Advances in virology		Advances in Virology		16878639	16878647	1	0	1	0	1	1	1	0	1
Comparative Cytogenetics		Comparative Cytogenetics	Comparative cytogenetics		Comparative Cytogenetics	COMP CYTOGENET	19930771	1993078X	1	0	1	0	1	1	1	1	1	0.755
Algorithms for Molecular Biology		Algorithms for Molecular Biology : AMB	Algorithms for molecular biology : AMB		Algorithms for Molecular Biology	ALGORITHM MOL BIOL	17487188	17487188	1	0	1	0	1	1	1	1	1	1.606
International Journal of Plant Genomics		International Journal of Plant Genomics	International journal of plant genomics		International Journal of Plant Genomics		16875370	16875389	1	0	1	0	1	1	1	0	1
Biotechnology for Biofuels		Biotechnology for Biofuels	Biotechnology for biofuels		Biotechnology for Biofuels	BIOTECHNOL BIOFUELS	17546834	17546834	1	0	1	0	1	1	1	1	1	5.552
Cell Division		Cell Division	Cell division		Cell Division	CELL DIV	17471028	17471028	1	0	1	0	1	1	1	1	1	3.471
Journal of Cytology		Journal of Cytology / Indian Academy of Cytologists	Journal of cytology / Indian Academy of Cytologists		Journal of Cytology	J CYTOL	09709371	09745165	1	0	1	0	1	1	1	1	1	0.359
Advances and Applications in Bioinformatics and Chemistry		Advances and Applications in Bioinformatics and Chemistry : AABC	Advances and applications in bioinformatics and chemistry : AABC		Advances and Applications in Bioinformatics and Chemistry		11786949	11786949	1	0	1	0	1	1	1	0	1
Biochemistry Research International		Biochemistry Research International	Biochemistry research international		Biochemistry Research International		20902247	20902255	1	0	1	0	1	1	1	0	1
Japanese Journal of Crop Science			Nihon Sakumotsu Gakkai kiji		Japanese Journal of Crop Science		00111848	13490990	1	0	1	0	0	1	1	0	1
Revista Romana de Bioetica			Revista romana de bioetica		Revista Romana de Bioetica	REV ROM BIOET	15835170	15835170	1	0	1	0	0	1	1	1	1	1
Dental Hypotheses			Dental hypotheses		Dental Hypotheses		21558213	21558213	1	0	1	0	0	1	1	0	1
Journal of Military and Veterans' Health			Journal of military and veterans' health		Journal of Military and Veterans' Health		18351271		1	0	1	0	0	1	1	0	1
Salud y Drogas			Salud y drogas		Salud y Drogas		15785319	1988205X	1	0	1	0	0	1	1	0	0
Turk hijiyen ve deneysel biyoloji dergisi. Turkish bulletin of hygiene and experimental biology			Turk hijiyen ve deneysel biyoloji dergisi. Turkish bulletin of hygiene and experimental biology		TÃ¼rk Hijyen ve Deneysel Biyoloji Dergisi		03779777	13082523	1	0	1	0	0	1	1	0	1
AIP Advances		AIP Advances	AIP advances		AIP Advances	AIP ADV	21583226	21583226	1	0	1	0	1	1	1	1	1	1.349
Annals of Surgical Innovation and Research		Annals of Surgical Innovation and Research	Annals of surgical innovation and research		Annals of Surgical Innovation and Research		17501164	17501164	1	0	1	0	1	1	1	0	1
Aquatic Biosystems		Aquatic Biosystems	Aquatic biosystems		Aquatic Biosystems		20469063	20469063	1	0	1	0	1	1	1	0	1
Asia Pacific Family Medicine		Asia Pacific Family Medicine	Asia Pacific family medicine		Asia Pacific Family Medicine		1447056X	1447056X	1	0	1	0	1	1	1	0	1
Asian Journal of Transfusion Science		Asian Journal of Transfusion Science	Asian journal of transfusion science		Asian Journal of Transfusion Science		09736247	19983565	1	0	1	0	1	1	1	0	1
Beilstein Journal of Nanotechnology		Beilstein Journal of Nanotechnology	Beilstein journal of nanotechnology		Beilstein Journal of Nanotechnology	BEILSTEIN J NANOTECH	21904286	21904286	1	0	1	0	1	1	1	1	1	2.374
Cell and Bioscience		Cell &#x0026; Bioscience	Cell & bioscience		Cell & Bioscience	CELL BIOSCI	20453701	20453701	1	0	1	0	1	1	1	1	1	3
Ecology and Evolution		Ecology and Evolution	Ecology and evolution		Ecology and Evolution	ECOL EVOL	20457758	20457758	1	0	1	0	1	1	1	1	1	1.184
Frontiers in Psychology		Frontiers in Psychology	Frontiers in psychology		Frontiers in Psychology		16641078	16641078	1	0	1	0	1	1	1	0	1
i-Perception		i-Perception	i-Perception		i-Perception		20416695	20416695	1	0	1	0	1	1	1	0	1
Insights into Imaging		Insights into Imaging	Insights into imaging		Insights into Imaging		18694101	18694101	1	0	1	0	1	1	1	0	1
International Journal of Integrated Care		International Journal of Integrated Care	International journal of integrated care		International Journal of Integrated Care	INT J INTEGR CARE	15684156	15684156	1	0	1	0	1	1	1	1	1	1.299
International Journal of Shoulder Surgery		International Journal of Shoulder Surgery	International journal of shoulder surgery		International Journal of Shoulder Surgery		09736042	09736042	1	0	1	0	1	1	1	0	1
Iranian Endodontic Journal		Iranian Endodontic Journal	Iranian endodontic journal		Iranian Endodontic Journal		17357497	20082746	1	0	1	0	1	1	1	0	1
Irish Veterinary Journal		Irish Veterinary Journal	Irish veterinary journal		Irish Veterinary Journal	IRISH VET J	20460481	20460481	1	0	1	0	1	1	1	1	1	0.443
Journal of Clinical and Experimental Dentistry		Journal of Clinical and Experimental Dentistry	Journal of clinical and experimental dentistry		Journal of Clinical and Experimental Dentistry		19895488	19895488	1	0	1	0	1	1	1	0	1
Journal of Trauma Management and Outcomes		Journal of Trauma Management &#x0026; Outcomes	Journal of trauma management & outcomes		Journal of Trauma Management & Outcomes		17522897	17522897	1	0	1	0	1	1	1	0	1
ORAL and Implantology		Oral &#x0026; Implantology	ORAL & implantology		Oral & Implantology		19745648	20352468	1	0	1	0	1	1	1	0	1
Skeletal Muscle		Skeletal Muscle	Skeletal muscle		Skeletal Muscle		20445040	20445040	1	0	1	0	1	1	1	0	1
SpringerPlus		SpringerPlus	SpringerPlus		SpringerPlus		21931801	21931801	1	0	1	0	1	1	1	0	1
Strategies in Trauma and Limb Reconstruction		Strategies in Trauma and Limb Reconstruction	Strategies in trauma and limb reconstruction (Online)		Strategies in Trauma and Limb Reconstruction		18288936	18288928	1	0	1	0	1	1	1	0	1
World Journal of Hepatology		World Journal of Hepatology	World journal of hepatology		World Journal of Hepatology		19485182	19485182	1	0	1	0	1	1	1	0	1
Pediatric endocrinology, diabetes, and metabolism	Pediatric endocrinology, diabetes, and metabolism		Pediatric endocrinology, diabetes, and metabolism		Pediatric Endocrinology, Diabetes and Metabolism		2081237X		1	0	1	1	0	1	1	0	1
International Journal of Special Education			International journal of special education		International Journal of Special Education		08273383		1	0	1	0	0	1	1	0	1
MolBank			Molbank		Molbank		14228599	14228599	1	0	1	0	0	1	1	0	1
Nordisk alkohol- & narkotikatidskrift			Nordisk alkohol- & narkotikatidskrift : NAT		Nordic Studies on Alcohol and Drugs		14550725	14586126	1	0	1	0	0	1	1	0	1
OnLine Journal of Biological Sciences			OnLine journal of biological sciences		OnLine Journal of Biological Sciences		16084217	16084217	1	0	1	0	0	1	1	0	1
Open Biology Journal			The open biology journal		Open Biology Journal		18741967	18741967	1	0	1	0	0	1	1	0	1
Revista Chilena de Nutricion			Revista chilena de nutricion : organo oficial de la Sociedad Chilena de Nutricion, Bromatologia y Toxicologia		Revista Chilena de NutricÃ­on		07161549	07177518	1	0	1	0	0	1	1	0	1
RICYDE. Revista internacional de ciencias del deporte			Revista internacional de ciencias del deporte		RICYDE : Revista Internacional de Ciencias del Deporte		18853137	18853137	1	0	1	0	0	1	1	0	1
South African Journal of Science			South African journal of science		South African Journal of Science	S AFR J SCI	00382353	19967489	1	0	1	0	0	1	1	1	1	0.835
Acta Bioethica			Acta bioethica		Acta Bioethica	ACTA BIOETH	07175906	1726569X	1	0	1	0	0	1	1	1	1	0.061
Acta Veterinaria			Acta veterinaria		Acta Veterinaria	ACTA VET-BEOGRAD	05678315	18207448	1	0	1	0	0	1	1	1	1	0.258
Asclepio			Asclepio; archivo iberoamericano de historia de la medicina y antropologia medica		Asclepio : Revista de Historia de la Medicina y de la Ciencia		02104466	19883102	1	0	1	0	0	1	1	0	1
British Columbia Medical Journal			British Columbia medical journal		British Columbia Medical Journal		00070556		1	0	1	0	0	1	1	0	1
Electronic Journal of Human Sexuality			The electronic journal of human sexuality		Electronic Journal of Human Sexuality		15455556	15455556	1	0	1	0	0	1	1	0	1
Internet Journal of Mental Health			The Internet journal of mental health		The Internet Journal of Mental Health		15312941	15312941	1	0	1	0	0	1	1	0	1
Jornal da Sociedade Brasileira de Fonoaudiologia			Jornal da Sociedade Brasileira de Fonoaudiologia		Jornal da Sociedade Brasileira de Fonoaudiologia		21796491	21796491	1	0	1	0	0	1	1	0	1
Journal of Exercise Physiology Online			Journal of exercise physiology online / American Society of Exercise Physiologists		Journal of Exercise Physiology - Online		10979751	10979751	1	0	1	0	0	1	1	0	1
Online Journal of Health and Allied Sciences			Online journal of health and allied sciences : OJHAS		Online Journal of Health & Allied Sciences		09725997	09725997	1	0	1	0	0	1	1	0	1
Pesquisa Brasileira em Odontopediatria e Clinica Integrada			Pesquisa brasileira em odontopediatria e clinica integrada		Pesquisa Brasileira em Odontopediatria e ClÃ­nica Integrada		15190501	19834632	1	0	1	0	0	1	1	0	0
Physis (Rio de Janeiro, Brazil)			Physis (Rio de Janeiro, Brazil)		PHYSIS		01037331	18094481	1	0	1	0	0	1	1	0	1
Revista Brasileira de Oftalmologia			Revista brasileira de oftalmologia		Revista Brasileira de Oftalmologia	REV BRAS OFTALMOL	00347280	19828551	1	0	1	0	0	1	1	1	0	0.16
Revista Chilena de Obstetricia y Ginecologia			Revista chilena de obstetricia y ginecologia		Revista Chilena de Obstetricia y GinecologÃ­a		0048766X	07177526	1	0	1	0	0	1	1	0	0
Revista Colombiana de Obstetricia y Ginecologia			Revista colombiana de obstetricia y ginecologia		Revista Colombiana de Obstetricia y GinecologÃ­a		00347434		1	0	1	0	0	1	1	0	1
Revista Cubana de Enfermeria			Revista cubana de enfermeria		Revista Cubana de EnfermerÃ­a		08640319	15612961	1	0	1	0	0	1	1	0	0
Revista Cubana de Estomatologia			Revista cubana de estomatologia		Revista Cubana de EstomatologÃ­a		00347507	1561297X	1	0	1	0	0	1	1	0	1
Revista Cubana de Medicina			Revista cubana de medicina		Revista Cubana de Medicina		00347523	1561302X	1	0	1	0	0	1	1	0	0
Revista Cubana de Pediatria			Revista cubana de pediatria		Revista Cubana de PediatrÃ­a		00347531	15613119	1	0	1	0	0	1	1	0	0
Revista de la Facultad de Medicina, Universidad Nacional de Colombia			Revista de la Facultad de Medicina, Universidad Nacional de Colombia		Revista Facultad de Medicina de la Universidad Nacional de Colombia		01200011		1	0	1	0	0	1	1	0	1
Revista de Obstetricia y Ginecologia de Venezuela			Revista de obstetricia y ginecologia de Venezuela		Revista de Obstetricia y GinecologÃ­a de Venezuela		00487732		1	0	1	0	0	1	1	0	0
Salud Mental			Salud mental (Mexico City, Mexico)		Salud Mental	SALUD MENT	01853325	0186761X	1	0	1	0	0	1	1	1	1	0.417
Slovenian Veterinary Research			Slovenski veterinarski zbornik = Slovenian veterinary research		Slovenian Veterinary Research	SLOV VET RES	15804003	15804003	1	0	1	0	0	1	1	1	1	0.647
Social Medicine			Social medicine (Social Medicine Publication Group)		Social Medicine		15577112	15577112	1	0	1	0	0	1	1	0	1
U.S. Pharmacist			U. S. pharmacist		U.S. Pharmacist		01484818		1	0	1	0	0	1	1	0	1
Acta Crystallographica Section E: Structure Reports Online		Acta Crystallographica Section E: Structure Reports Online	Acta crystallographica. Section E, Structure reports online		Acta Crystallographica Section E		16005368	16005368	1	0	1	0	1	1	1	0	1
Acta Histochemica et Cytochemica		Acta Histochemica et Cytochemica	Acta histochemica et cytochemica		Acta Histochemica et Cytochemica	ACTA HISTOCHEM CYTOC	00445991	13475800	1	0	1	0	1	1	1	1	1	1.48
Acta Ortopedica Brasileira		Acta Ortopedica Brasileira	Acta ortopedica brasileira		Acta OrtopÃ©dica Brasileira		14137852	18094406	1	0	1	0	1	1	1	0	1
Advances in Bioinformatics		Advances in Bioinformatics	Advances in bioinformatics		Advances in Bioinformatics		16878027	16878035	1	0	1	0	1	1	1	0	1
Advances in Cognitive Psychology		Advances in Cognitive Psychology	Advances in cognitive psychology / University of Finance and Management in Warsaw		Advances in Cognitive Psychology		18951171	18951171	1	0	1	0	1	1	1	0	1
Advances in Urology		Advances in Urology	Advances in urology		Advances in Urology		16876369	16876377	1	0	1	0	1	1	1	0	1
AIDS Research and Treatment		AIDS Research and Treatment	AIDS research and treatment		AIDS Research and Treatment		20901240	20901259	1	0	1	0	1	1	1	0	1
Analytical Chemistry Insights		Analytical Chemistry Insights	Analytical chemistry insights		Analytical Chemistry Insights		11773901	11773901	1	0	1	0	1	1	1	0	1
Anemia		Anemia	Anemia		Anemia		20901267	20901275	1	0	1	0	1	1	1	0	1
Archives of Public Health		Archives of Public Health	Archives of public health = Archives belges de sante publique		Archives of Public Health		20493258	20493258	1	0	1	0	1	1	1	0	1
Asian Journal of Sports Medicine		Asian Journal of Sports Medicine	Asian journal of sports medicine		Asian journal of Sports Medicine		2008000X	20087209	1	0	1	0	1	1	1	0	1
Beilstein Journal of Organic Chemistry		Beilstein Journal of Organic Chemistry	Beilstein journal of organic chemistry		Beilstein Journal of Organic Chemistry	BEILSTEIN J ORG CHEM	18605397	18605397	1	0	1	0	1	1	1	1	1	2.801
Bioinorganic Chemistry and Applications		Bioinorganic Chemistry and Applications	Bioinorganic chemistry and applications		Bioinorganic Chemistry and Applications	BIOINORG CHEM APPL	15653633	1687479X	1	0	1	0	1	1	1	1	1	1.165
Biology of Sport		Biology of Sport	Biology of sport / Institute of Sport		Biology of Sport	BIOL SPORT	0860021X	20831862	1	0	1	0	1	1	1	1	1	0.415
BioPsychoSocial Medicine		Biopsychosocial Medicine	BioPsychoSocial medicine		BioPsychoSocial Medicine		17510759	17510759	1	0	1	0	1	1	1	0	1
BMC Biophysics		BMC Biophysics	BMC biophysics		BMC Biophysics	BMC BIOPHYS	20461682	20461682	1	0	1	0	1	1	1	1	1	1.667
BMC Nursing		BMC Nursing	BMC nursing		BMC Nursing		14726955	14726955	1	0	1	0	1	1	1	0	1
Breeding Science		Breeding Science	Breeding science		Breeding Science	BREEDING SCI	13447610	13473735	1	0	1	0	1	1	1	1	1	1.04
Carbon Balance and Management		Carbon Balance and Management	Carbon balance and management		Carbon Balance and Management		17500680	17500680	1	0	1	0	1	1	1	0	1
Chemistry Central Journal		Chemistry Central Journal	Chemistry Central journal		Chemistry Central Journal	CHEM CENT J	1752153X	1752153X	1	0	1	0	1	1	1	1	1	1.312
Clinical and Experimental Otorhinolaryngology		Clinical and Experimental Otorhinolaryngology	Clinical and experimental otorhinolaryngology		Clinical and Experimental Otorhinolaryngology	CLIN EXP OTORHINOLAR	19768710	20050720	1	0	1	0	1	1	1	1	1	0.877
Clinical, Cosmetic and Investigational Dentistry		Clinical, Cosmetic and Investigational Dentistry	Clinical, cosmetic and investigational dentistry		Clinical, Cosmetic and Investigational Dentistry		11791357	11791357	1	0	1	0	1	1	1	0	1
Conflict and Health		Conflict and Health	Conflict and health		Conflict and Health		17521505	17521505	1	0	1	0	1	1	1	0	1
Critical Care Research and Practice		Critical Care Research and Practice	Critical care research and practice		Critical Care Research and Practice		20901305	20901313	1	0	1	0	1	1	1	0	1
Current Gerontology and Geriatrics Research		Current Gerontology and Geriatrics Research	Current gerontology and geriatrics research		Current Gerontology and Geriatrics Research		16877063	16877071	1	0	1	0	1	1	1	0	1
Depression Research and Treatment		Depression Research and Treatment	Depression research and treatment		Depression Research and Treatment		20901321	2090133X	1	0	1	0	1	1	1	0	1
EvoDevo		EvoDevo	EvoDevo		EvoDevo	EVODEVO	20419139	20419139	1	0	1	0	1	1	1	1	1	3.914
Frontiers in Zoology		Frontiers in Zoology	Frontiers in zoology		Frontiers in Zoology	FRONT ZOOL	17429994	17429994	1	0	1	0	1	1	1	1	1	3.871
Geochemical Transactions		Geochemical Transactions	Geochemical transactions		Geochemical Transactions	GEOCHEM T	14674866	14674866	1	0	1	0	1	1	1	1	1	1.5
GMS Psycho-Social-Medicine		GMS Psycho-Social-Medicine	Psycho-social medicine		GMS Psycho-Social-Medicine		18605214	18605214	1	0	1	0	1	1	1	0	1
Gut Pathogens		Gut Pathogens	Gut pathogens		Gut Pathogens	GUT PATHOG	17574749	17574749	1	0	1	0	1	1	1	1	1	2.738
HPB Surgery		HPB Surgery	HPB surgery : a world journal of hepatic, pancreatic and biliary surgery		HPB Surgery		08948569	16078462	1	0	1	0	1	1	1	0	1
Indian Journal of Community Medicine		Indian Journal of Community Medicine : Official Publication of Indian Association of Preventive &#x0026; Social Medicine	Indian journal of community medicine : official publication of Indian Association of Preventive & Social Medicine		Indian Journal of Community Medicine		09700218	19983581	1	0	1	0	1	1	1	0	1
Indian Journal of Orthopaedics		Indian Journal of Orthopaedics	Indian journal of orthopaedics		Indian Journal of Orthopaedics	INDIAN J ORTHOP	00195413	19983727	1	0	1	0	1	1	1	1	1	0.737
Indian Journal of Palliative Care		Indian Journal of Palliative Care	Indian journal of palliative care		Indian Journal of Palliative Care		09731075	19983735	1	0	1	0	1	1	1	0	1
Indian Journal of Plastic Surgery		Indian Journal of Plastic Surgery : Official Publication of the Association of Plastic Surgeons of India	Indian journal of plastic surgery : official publication of the Association of Plastic Surgeons of India		Indian Journal of Plastic Surgery		09700358	1998376X	1	0	1	0	1	1	1	0	1
Indian Journal of Psychological Medicine		Indian Journal of Psychological Medicine	Indian journal of psychological medicine		Indian Journal of Psychological Medicine		02537176	09751564	1	0	1	0	1	1	1	0	1
International Breastfeeding Journal		International Breastfeeding Journal	International breastfeeding journal		International Breastfeeding Journal		17464358	17464358	1	0	1	0	1	1	1	0	1
International Journal of Analytical Chemistry		International Journal of Analytical Chemistry	International journal of analytical chemistry		International Journal of Analytical Chemistry		16878760	16878779	1	0	1	0	1	1	1	0	1
International Journal of Dentistry		International Journal of Dentistry	International journal of dentistry		International Journal of Dentistry		16878728	16878736	1	0	1	0	1	1	1	0	1
International Journal of Nephrology		International Journal of Nephrology	International journal of nephrology		International Journal of Nephrology		20902158	20902158	1	0	1	0	1	1	1	0	1
International Journal of Therapeutic Massage and Bodywork: Research, Education, and Practice		International Journal of Therapeutic Massage &#x0026; Bodywork	International journal of therapeutic massage & bodywork		International Journal of Therapeutic Massage & Bodywork		1916257X	1916257X	1	0	1	0	1	1	1	0	1
International Journal of Tryptophan Research		International Journal of Tryptophan Research : IJTR	International journal of tryptophan research : IJTR		International Journal of Tryptophan Research		11786469	11786469	1	0	1	0	1	1	1	0	1
Journal of Asthma and Allergy		Journal of Asthma and Allergy	Journal of asthma and allergy		Journal of Asthma and Allergy		11786965	11786965	1	0	1	0	1	1	1	0	1
Journal of Biophysics		Journal of Biophysics	Journal of biophysics (Hindawi Publishing Corporation : Online)		Journal of Biophysics		16878000	16878019	1	0	1	0	1	1	1	0	1
Journal of Cheminformatics		Journal of Cheminformatics	Journal of cheminformatics		Journal of Cheminformatics	J CHEMINFORMATICS	17582946	17582946	1	0	1	0	1	1	1	1	1	3.59
Journal of Clinical Bioinformatics		Journal of Clinical Bioinformatics	Journal of clinical bioinformatics		Journal of Clinical Bioinformatics		20439113	20439113	1	0	1	0	1	1	1	0	1
Journal of Community Eye Health		Community Eye Health	Community eye health / International Centre for Eye Health		Community Eye Health Journal		09536833	19937288	1	0	1	0	1	1	1	0	1
Journal of Conservative Dentistry		Journal of Conservative Dentistry : JCD	Journal of conservative dentistry : JCD		Journal of Conservative Dentistry		09720707	09745203	1	0	1	0	1	1	1	0	1
Journal of Equine Science		Journal of Equine Science	Journal of equine science / Japanese Society of Equine Science		Journal of Equine Science		13403516	13477501	1	0	1	0	1	1	1	0	1
Journal of Foot and Ankle Research		Journal of Foot and Ankle Research	Journal of foot and ankle research		Journal of Foot and Ankle Research	J FOOT ANKLE RES	17571146	17571146	1	0	1	0	1	1	1	1	1	1.466
Journal of Indian Association of Pediatric Surgeons		Journal of Indian Association of Pediatric Surgeons	Journal of Indian Association of Pediatric Surgeons		Journal of Indian Association of Pediatric Surgeons		09719261	19983891	1	0	1	0	1	1	1	0	1
Journal of Indian Society of Periodontology		Journal of Indian Society of Periodontology	Journal of Indian Society of Periodontology		Journal of the Indian Society of Periodontology		0972124X	09751580	1	0	1	0	1	1	1	0	1
Journal of Medical Ethics and History of Medicine		Journal of Medical Ethics and History of Medicine	Journal of medical ethics and history of medicine		Journal of Medical Ethics and History of Medicine		20080387	20080387	1	0	1	0	1	1	1	0	1
Journal of Nutrition and Metabolism		Journal of Nutrition and Metabolism	Journal of nutrition and metabolism		Journal of Nutrition and Metabolism		20900724	20900732	1	0	1	0	1	1	1	0	1
Journal of Ophthalmic and Vision Research		Journal of Ophthalmic &#x0026; Vision Research	Journal of ophthalmic & vision research		Journal of Ophthalmic & Vision Research		20082010	2008322X	1	0	1	0	1	1	1	0	1
Journal of Ophthalmology		Journal of Ophthalmology	Journal of ophthalmology		Journal of Ophthalmology	J OPHTHALMOL	2090004X	20900058	1	0	1	0	1	1	1	1	1	1.368
Journal of Oral and Maxillofacial Pathology		Journal of Oral and Maxillofacial Pathology : JOMFP	Journal of oral and maxillofacial pathology : JOMFP		Journal of Oral and Maxillofacial Pathology		0973029X	1998393X	1	0	1	0	1	1	1	0	1
Journal of Physical Therapy Science		Journal of Physical Therapy Science	Journal of physical therapy science		Journal of Physical Therapy Science	J PHYS THER SCI	09155287	21875626	1	0	1	0	1	1	1	1	1	0.175
Journal of Sports Science and Medicine		Journal of Sports Science &#x0026; Medicine	Journal of sports science & medicine		Journal of Sports Science and Medicine	J SPORT SCI MED	13032968	13032968	1	0	1	0	1	1	1	1	1	0.953
Journal of the International Society of Sports Nutrition		Journal of the International Society of Sports Nutrition	Journal of the International Society of Sports Nutrition		Journal of the International Society of Sports Nutrition	J INT SOC SPORT NUTR	15502783	15502783	1	0	1	0	1	1	1	1	1	1.825
Journal of Undergraduate Neuroscience Education		Journal of Undergraduate Neuroscience Education	Journal of undergraduate neuroscience education : JUNE : a publication of FUN, Faculty for Undergraduate Neuroscience		Journal of Undergraduate Neuroscience Education		15442896	15442896	1	0	1	0	1	1	1	0	1
Korean Journal of Pathology		Korean Journal of Pathology	Korean journal of pathology		Korean Journal of Pathology	KOREAN J PATHOL	17381843	20928920	1	0	1	0	1	1	1	1	1	0.174
Mens Sana Monographs		Mens Sana Monographs	Mens sana monographs		Mens Sana Monographs		09731229	19984014	1	0	1	0	1	1	1	0	1
Minimally Invasive Surgery		Minimally Invasive Surgery	Minimally invasive surgery		Minimally Invasive Surgery		20901445	20901453	1	0	1	0	1	1	1	0	1
Nanoscale Research Letters		Nanoscale Research Letters	Nanoscale research letters		Nanoscale Research Letters	NANOSCALE RES LETT	19317573	1556276X	1	0	1	0	1	1	1	1	1	2.524
Open Dentistry Journal		The Open Dentistry Journal	The open dentistry journal		Open Dentistry Journal		18742106	18742106	1	0	1	0	1	1	1	0	1
Pain Research and Treatment		Pain Research and Treatment	Pain research and treatment		Pain Research and Treatment		20901542	20901550	1	0	1	0	1	1	1	0	1
Pathology Research International		Pathology Research International	Pathology research international		Pathology Research International		20908091	2042003X	1	0	1	0	1	1	1	0	1
Plant Methods		Plant Methods	Plant methods		Plant Methods	PLANT METHODS	17464811	17464811	1	0	1	0	1	1	1	1	1	2.667
Psychology Research and Behavior Management		Psychology Research and Behavior Management	Psychology research and behavior management		Psychology Research and Behavior Management		11791578	11791578	1	0	1	0	1	1	1	0	1
Revista Brasileira de Hematologia e Hemoterapia		Revista Brasileira de Hematologia e Hemoterapia	Revista brasileira de hematologia e hemoterapia		Revista Brasileira de Hematologia e Hemoterapia		15168484	18060870	1	0	1	0	1	1	1	0	1
Source Code for Biology and Medicine		Source Code for Biology and Medicine	Source code for biology and medicine		Source Code for Biology and Medicine		17510473	17510473	1	0	1	0	1	1	1	0	1
Studies in Mycology		Studies in Mycology	Studies in mycology		Studies in Mycology	STUD MYCOL	01660616	18729797	1	0	1	0	1	1	1	1	1	6.231
Sultan Qaboos University Medical Journal		Sultan Qaboos University Medical Journal	Sultan Qaboos University medical journal		Sultan Qaboos University Medical Journal : SQUMJ		2075051X	20750528	1	0	1	0	1	1	1	0	1
Veterinary Medicine International		Veterinary Medicine International	Veterinary medicine international		Veterinary Medicine International		20908113	20420048	1	0	1	0	1	1	1	0	1
World Journal of Emergency Surgery		World Journal of Emergency Surgery : WJES	World journal of emergency surgery : WJES		World Journal of Emergency Surgery	WORLD J EMERG SURG	17497922	17497922	1	0	1	0	1	1	1	1	1	0.918
ZooKeys		ZooKeys	ZooKeys		ZooKeys	ZOOKEYS	13132989	13132970	1	0	1	0	1	1	1	1	1	0.864
Journal of Neurodevelopmental Disorders		Journal of Neurodevelopmental Disorders	Journal of neurodevelopmental disorders	Journal of Neurodevelopmental Disorders	Journal of Neurodevelopmental Disorders	J NEURODEV DISORD	18661947	18661955	1	1	1	0	1	1	1	1	1	3.448
Acta Biochimica Polonica	Acta biochimica Polonica		Acta biochimica Polonica	Acta biochimica Polonica	Acta Biochimica Polonica	ACTA BIOCHIM POL	0001527X	1734154X	1	1	1	1	0	1	1	1	1	1.185
Acta Chimica Slovenica	Acta chimica Slovenica		Acta chimica Slovenica	Acta chimica Slovenica	Acta Chimica Slovenica	ACTA CHIM SLOV	13180207	15803155	1	1	1	1	0	1	1	1	1	1.135
Acta chirurgica Iugoslavica	Acta chirurgica Iugoslavica		Acta chirurgica Iugoslavica	Acta chirurgica Iugoslavica	Acta Chirurgica Iugoslavica		0354950X		1	1	1	1	0	1	1	0	1
Acta Cirurgica Brasileira	Acta cirúrgica brasileira / Sociedade Brasileira para Desenvolvimento Pesquisa em Cirurgia		Acta cirurgica brasileira / Sociedade Brasileira para Desenvolvimento Pesquisa em Cirurgia	Acta Cirurgica Brasileira	Acta Cirurgica Brasileira	ACTA CIR BRAS	01028650	16782674	1	1	1	1	0	1	1	1	1	0.626
Acta Dermato-Venereologica	Acta dermato-venereologica		Acta dermato-venereologica	Acta Dermato-Venereologica	Acta Dermato-Venereologica	ACTA DERM-VENEREOL	00015555	16512057	1	1	1	1	0	1	1	1	1	3.487
Acta Gastroenterologica Latinoamericana	Acta gastroenterologica Latinoamericana		Acta gastroenterologica Latinoamericana	Acta Gastroenterologica Latinoamericana	Acta GastroenterolÃ³gica Latinoamericana		03009033		1	1	1	1	0	1	1	0	1
Acta medica (Hradec Kralove) / Universitas Carolina, Facultas Medica Hradec Kralove	Acta medica (Hradec Králové) / Universitas Carolina, Facultas Medica Hradec Králové		Acta medica (Hradec Kralove) / Universitas Carolina, Facultas Medica Hradec Kralove	Acta medica (Hradec Králové) / Universitas Carolina, Facultas Medica Hradec Králové	Acta Medica		12114286	18059694	1	1	1	1	0	1	1	0	1
Acta medica Indonesiana	Acta medica Indonesiana		Acta medica Indonesiana	Acta medica Indonesiana	Acta Medica Indonesiana		01259326	23382732	1	1	1	1	0	1	1	0	1
Acta Medica Iranica	Acta medica Iranica		Acta medica Iranica	Acta Medica Iranica	Acta Medica Iranica		00446025	17359694	1	1	1	1	0	1	1	0	1
Acta Medica Okayama	Acta medica Okayama		Acta medica Okayama	Acta medica Okayama	Acta Medica Okayama	ACTA MED OKAYAMA	0386300X	0386300X	1	1	1	1	0	1	1	1	1	0.652
Acta Medica Portuguesa	Acta médica portuguesa		Acta medica portuguesa	Acta Medica Portuguesa	Acta MÃ©dica Portuguesa	ACTA MEDICA PORT	16460758	16460758	1	1	1	1	0	1	1	1	1	0.151
Acta Medica Saliniana				Acta Medica Saliniana	Acta Medica Saliniana		0350364X	18403956	1	1	1	0	0	0	1	0	1
Acta Neurobiologiae Experimentalis	Acta neurobiologiae experimentalis		Acta neurobiologiae experimentalis	Acta neurobiologiae experimentalis	Acta Neurobiologiae Experimentalis	ACTA NEUROBIOL EXP	00651400	16890035	1	1	1	1	0	1	1	1	1	1.977
Acta Orthopaedica	Acta orthopaedica	Acta Orthopaedica	Acta orthopaedica	Acta Orthopaedica	Acta Orthopaedica	ACTA ORTHOP	17453674	17453682	1	1	1	1	1	1	1	1	1	2.736
Acta Orthopaedica et Traumatologica Turcica	Acta orthopaedica et traumatologica turcica		Acta orthopaedica et traumatologica turcica	Acta orthopaedica et traumatologica turcica	Acta Orthopaedica et Traumatologica Turcica	ACTA ORTHOP TRAUMATO	1017995X	1017995X	1	1	1	1	0	1	1	1	1	0.597
Acta Otorhinolaryngologica Italica	Acta otorhinolaryngologica Italica : organo ufficiale della Società italiana di otorinolaringologia e chirurgia cervico-facciale	Acta Otorhinolaryngologica Italica	Acta otorhinolaryngologica Italica : organo ufficiale della Societa italiana di otorinolaringologia e chirurgia cervico-facciale	Acta otorhinolaryngologica Italica : organo ufficiale della Società italiana di otorinolaringologia e chirurgia cervico-facciale	Acta Otorhinolaryngologica Italica	ACTA OTORHINOLARYNGO	0392100X	1827675X	1	1	1	1	1	1	1	1	1	0.786
Acta Pharmaceutica	Acta pharmaceutica (Zagreb, Croatia)		Acta pharmaceutica (Zagreb, Croatia)	Acta Pharmaceutica	Acta Pharmaceutica	ACTA PHARMACEUT	13300075	18469558	1	1	1	1	0	1	1	1	1	1.162
Acta Scientiarum - Biological Sciences				Acta Scientiarum - Biological Sciences	Acta Scientiarum : Biological Sciences		16799283	1807863X	1	1	1	0	0	0	1	0	1
Acta Scientiarum - Health Sciences				Acta Scientiarum - Health Sciences	Acta Scientiarum : Health Sciences		16799291	18078648	1	1	1	0	0	0	1	0	1
Acta Scientiarum Polonorum, Technologia Alimentaria	Acta scientiarum polonorum. Technologia alimentaria		Acta scientiarum polonorum. Technologia alimentaria	Acta scientiarum polonorum. Technologia alimentaria	Acta Scientiarum Polonorum : Technologia Alimentaria		16440730	18989594	1	1	1	1	0	1	1	0	1
Acta Stomatologica Croatica			Acta stomatologica Croatica	Acta Stomatologica Croatica	Acta Stomatologica Croatica		00017019	18460410	1	1	1	0	0	1	1	0	1
Acta Veterinaria Scandinavica	Acta veterinaria Scandinavica	Acta Veterinaria Scandinavica	Acta veterinaria Scandinavica	Acta veterinaria Scandinavica	Acta Veterinaria Scandinavica	ACTA VET SCAND	17510147	17510147	1	1	1	1	1	1	1	1	1	1.345
Addiction Science & Clinical Practice	Addiction science & clinical practice	Addiction Science &#x0026; Clinical Practice	Addiction science & clinical practice	Addiction science & clinical practice	Addiction Science and Clinical Practice		19400632	19400640	1	1	1	1	1	1	1	0	1
Advanced Pharmaceutical Bulletin		Advanced Pharmaceutical Bulletin	Advanced pharmaceutical bulletin	Advanced Pharmaceutical Bulletin	Advanced Pharmaceutical Bulletin		22285881	22517308	1	1	1	0	1	1	1	0	1
Advances in Hematology		Advances in Hematology	Advances in hematology	Advances in Hematology	Advances in Hematology		16879104	16879112	1	1	1	0	1	1	1	0	1
Advances in Pharmacological Sciences		Advances in Pharmacological Sciences	Advances in pharmacological sciences	Advances in Pharmacological Sciences	Advances in Pharmacological Sciences		16876334	16876342	1	1	1	0	1	1	1	0	1
American Journal of Physiology - Advances in Physiology Education	Advances in physiology education	Advances in Physiology Education	Advances in physiology education	Advances in physiology education	Advances in Physiology Education	ADV PHYSIOL EDUC	10434046	15221229	1	1	1	1	1	1	1	1	1	1.217
African Health Sciences	African health sciences	African Health Sciences	African health sciences	African Health Sciences	African Health Sciences	AFR HEALTH SCI	16806905	17290503	1	1	1	1	1	1	1	1	1	0.5
African Journal of Neurological Sciences				African Journal of Neurological Sciences	African Journal of Neurological Sciences		10158618	19922647	1	1	1	0	0	0	1	0	1
African Journal of Paediatric Surgery	African journal of paediatric surgery : AJPS		African journal of paediatric surgery : AJPS	African journal of paediatric surgery : AJPS	African Journal of Paediatric Surgery		01896725	09745998	1	1	1	1	0	1	1	0	1
African Journal of Reproductive Health	African journal of reproductive health		African journal of reproductive health	African journal of reproductive health	African Journal of Reproductive Health		11184841		1	1	1	1	0	1	1	0	1
AIDS Research and Therapy		AIDS Research and Therapy	AIDS research and therapy	AIDS Research and Therapy	AIDS Research and Therapy	AIDS RES THER	17426405	17426405	1	1	1	0	1	1	1	1	1	1.78
Allergology International	Allergology international : official journal of the Japanese Society of Allergology		Allergology international : official journal of the Japanese Society of Allergology	Allergology International	Allergology International		13238930	14401592	1	1	1	1	0	1	1	0	1
Allergy, Asthma and Clinical Immunology		Allergy, Asthma, and Clinical Immunology : Official Journal of the Canadian Society of Allergy and Clinical Immunology	Allergy, asthma, and clinical immunology : official journal of the Canadian Society of Allergy and Clinical Immunology	Allergy, Asthma and Clinical Immunology	Allergy, Asthma & Clinical Immunology		17101484	17101492	1	1	1	0	1	1	1	0	1
AMB Express		AMB Express	AMB Express	AMB Express	AMB Express		21910855	21910855	1	1	1	0	1	1	1	0	1
American Journal of Biochemistry and Biotechnology				American Journal of Biochemistry and Biotechnology	American Journal of Biochemistry and Biotechnology		15533468		1	1	1	0	0	0	1	0	1
American Journal of Immunology			American journal of immunology	American Journal of Immunology	American Journal of Immunology		1553619X	15583775	1	1	1	0	0	1	1	0	1
American Journal of Infectious Diseases			American journal of infectious diseases	American Journal of Infectious Diseases	American Journal of Infectious Diseases		15536203		1	1	1	0	0	1	1	0	1
American Journal of Pharmaceutical Education	American journal of pharmaceutical education	American Journal of Pharmaceutical Education	American journal of pharmaceutical education	American journal of pharmaceutical education	American Journal of Pharmaceutical Education		00029459	15536467	1	1	1	1	1	1	1	0	1
American Journal of Translational Research		American Journal of Translational Research	American journal of translational research	American Journal of Translational Research	American Journal of Translational Research		19438141	19438141	1	1	1	0	1	1	1	0	1
Anadolu Kardiyoloji Dergisi	Anadolu kardiyoloji dergisi : AKD = the Anatolian journal of cardiology		Anadolu kardiyoloji dergisi : AKD = the Anatolian journal of cardiology	Anadolu Kardiyoloji Dergisi	Anadolu Kardiyoloji Dergisi	ANADOLU KARDIYOL DER	13028723	13080032	1	1	1	1	0	1	1	1	1	0.715
Anaesthesia, Pain and Intensive Care				Anaesthesia, Pain and Intensive Care	Anaesthesia, Pain & Intensive Care		16078322	22205799	1	1	1	0	0	0	1	0	1
Anais Brasileiros de Dermatologia	Anais brasileiros de dermatologia	Anais Brasileiros de Dermatologia	Anais brasileiros de dermatologia	Anais Brasileiros de Dermatologia	Anais Brasileiros de Dermatologia	AN BRAS DERMATOL	03650596	18064841	1	1	1	1	1	1	1	1	1	0.618
Anais da Academia Brasileira de Ciencias	Anais da Academia Brasileira de Ciências		Anais da Academia Brasileira de Ciencias	Anais da Academia Brasileira de Ciências	Anais da Academia Brasileira de Ciencias.	AN ACAD BRAS CIENC	00013765	16782690	1	1	1	1	0	1	1	1	1	0.851
Anales del Sistema Sanitario de Navarra	Anales del sistema sanitario de Navarra		Anales del sistema sanitario de Navarra	Anales del Sistema Sanitario de Navarra	Anales del Sistema Sanitario de Navarra	AN SIST SANIT NAVAR	11376627	11376627	1	1	1	1	0	1	1	1	1	0.351
Analytical Sciences	Analytical sciences : the international journal of the Japan Society for Analytical Chemistry		Analytical sciences : the international journal of the Japan Society for Analytical Chemistry	Analytical sciences : the international journal of the Japan Society for Analytical Chemistry	Analytical Sciences	ANAL SCI	09106340	13482246	1	1	1	1	0	1	1	1	1	1.569
Anesthesiology Research and Practice		Anesthesiology Research and Practice	Anesthesiology research and practice	Anesthesiology Research and Practice	Anesthesiology Research and Practice		16876962	16876970	1	1	1	0	1	1	1	0	1
Annales de Toxicologie Analytique				Annales de Toxicologie Analytique	Annales de Toxicologie Analytique		0768598X	19619480	1	1	1	0	0	0	1	0	1
Annali dell'Istituto Superiore di Sanita	Annali dell'Istituto superiore di sanità		Annali dell'Istituto superiore di sanita	Annali dell'Istituto superiore di sanità	Annali dell'Istituto Superiore di SanitÃ	ANN I SUPER SANITA	00212571	00212571	1	1	1	1	0	1	1	1	1	0.763
Annals of Agricultural and Environmental Medicine	Annals of agricultural and environmental medicine : AAEM		Annals of agricultural and environmental medicine : AAEM	Annals of Agricultural and Environmental Medicine	Annals of Agricultural and Environmental Medicine	ANN AGR ENV MED	12321966	18982263	1	1	1	1	0	1	1	1	1	3.06
Annals of Cardiac Anaesthesia	Annals of cardiac anaesthesia		Annals of cardiac anaesthesia	Annals of Cardiac Anaesthesia	Annals of Cardiac Anaesthesia		09719784	09745181	1	1	1	1	0	1	1	0	1
Annals of Clinical Microbiology and Antimicrobials	Annals of clinical microbiology and antimicrobials	Annals of Clinical Microbiology and Antimicrobials	Annals of clinical microbiology and antimicrobials	Annals of Clinical Microbiology and Antimicrobials	Annals of Clinical Microbiology and Antimicrobials	ANN CLIN MICROB ANTI	14760711	14760711	1	1	1	1	1	1	1	1	1	1.623
Annals of Family Medicine	Annals of family medicine	Annals of Family Medicine	Annals of family medicine	Annals of family medicine	Annals of Family Medicine	ANN FAM MED	15441709	15441717	1	1	1	1	1	1	1	1	1	4.613
Annals of Gastroenterology		Annals of Gastroenterology : Quarterly Publication of the Hellenic Society of Gastroenterology	Annals of gastroenterology : quarterly publication of the Hellenic Society of Gastroenterology	Annals of Gastroenterology	Annals of Gastroenterology		11087471	17927463	1	1	1	0	1	1	1	0	1
Annals of General Psychiatry		Annals of General Psychiatry	Annals of general psychiatry	Annals of General Psychiatry	Annals of General Psychiatry	ANN GEN PSYCHIATR	1744859X	1744859X	1	1	1	0	1	1	1	1	1	1.569
Annals of Indian Academy of Neurology		Annals of Indian Academy of Neurology	Annals of Indian Academy of Neurology	Annals of Indian Academy of Neurology	Annals of Indian Academy of Neurology	ANN INDIAN ACAD NEUR	09722327	19983549	1	1	1	0	1	1	1	1	1	0.572
Annals of Intensive Care		Annals of Intensive Care	Annals of intensive care	Annals of Intensive Care	Annals of Intensive Care		21105820	21105820	1	1	1	0	1	1	1	0	1
Annals of Neurosciences				Annals of Neurosciences	Annals of Neurosciences		09727531	09763260	1	1	1	0	0	0	1	0	1
Annals of Saudi Medicine	Annals of Saudi medicine	Annals of Saudi Medicine	Annals of Saudi medicine	Annals of Saudi Medicine	Annals of Saudi Medicine	ANN SAUDI MED	02564947	09754466	1	1	1	1	1	1	1	1	1	1.103
Annals of Thoracic Medicine		Annals of Thoracic Medicine	Annals of thoracic medicine	Annals of Thoracic Medicine	Annals of Thoracic Medicine	ANN THORAC MED	18171737	19983557	1	1	1	0	1	1	1	1	1	1.123
Annals of Tropical Medicine and Public Health				Annals of Tropical Medicine and Public Health	Annals of Tropical Medicine and Public Health		17556783	09746005	1	1	1	0	0	0	1	0	1
Application of Clinical Genetics		The Application of Clinical Genetics	The application of clinical genetics	Application of Clinical Genetics	The Application of Clinical Genetics		1178704X	1178704X	1	1	1	0	1	1	1	0	1
Applied Cardiopulmonary Pathophysiology			Applied cardiopulmonary pathophysiology : ACP	Applied Cardiopulmonary Pathophysiology	Applied Cardiopulmonary Pathophysiology		09205268	1573790X	1	1	1	0	0	1	1	0	1
Archaea	Archaea (Vancouver, B.C.)	Archaea	Archaea (Vancouver, B.C.)	Archaea (Vancouver, B.C.)	Archaea	ARCHAEA	14723646	14723654	1	1	1	1	1	1	1	1	1	2.545
Archive of Oncology			Archive of oncology / [Institute of Oncology Sremska Kamenica Yugoslavia]	Archive of Oncology	Archive of Oncology		03547310	14509520	1	1	1	0	0	1	1	0	1
Iranian Journal of Clinical Infectious Diseases				Archives of Clinical Infectious Diseases	Iranian Journal of Clinical Infectious Diseases		23452641	20081081	1	1	1	0	0	0	1	0	1
Archives of Hellenic Medicine				Archives of Hellenic Medicine	Archives of Hellenic Medicine		11053992		1	1	1	0	0	0	1	0	1
Archives of Medical Science		Archives of Medical Science : AMS	Archives of medical science : AMS	Archives of Medical Science	Archives of Medical Science	ARCH MED SCI	17341922	18969151	1	1	1	0	1	1	1	1	1	1.067
Archives of Plastic Surgery		Archives of Plastic Surgery	Archives of plastic surgery	Archives of Plastic Surgery	Archives of Plastic Surgery		22346163	22346171	1	1	1	0	1	1	1	0	1
Archives of Psychiatry and Psychotherapy				Archives of Psychiatry and Psychotherapy	Archives of Psychiatry and Psychotherapy		15092046	2083828X	1	1	1	0	0	0	1	0	1
Archivos de la Sociedad Espanola de Oftalmologia	Archivos de la Sociedad Española de Oftalmología		Archivos de la Sociedad Espanola de Oftalmologia	Archivos de la Sociedad Española de Oftalmología	Archivos de la Sociedad EspaÃ±ola de OftalmologÃ­a		03656691	19897286	1	1	1	1	0	1	1	0	1
Arhiv za Higijenu Rada i Toksikologiju	Arhiv za higijenu rada i toksikologiju		Arhiv za higijenu rada i toksikologiju	Arhiv za Higijenu Rada i Toksikologiju	Arhiv za Higijenu Rada i Toksikologiju	ARH HIG RADA TOKSIKO	00041254	18486312	1	1	1	1	0	1	1	1	1	0.674
Arquivos Brasileiros de Cardiologia	Arquivos brasileiros de cardiologia	Arquivos Brasileiros de Cardiologia	Arquivos brasileiros de cardiologia	Arquivos Brasileiros de Cardiologia	Arquivos Brasileiros de Cardiologia	ARQ BRAS CARDIOL	0066782X	16784170	1	1	1	1	1	1	1	1	1	1.13
Arquivos Brasileiros de Endocrinologia e Metabologia	Arquivos brasileiros de endocrinologia e metabologia		Arquivos brasileiros de endocrinologia e metabologia	Arquivos brasileiros de endocrinologia e metabologia	Arquivos brasileiros de Endocrinologia e Metabologia	ARQ BRAS ENDOCRINOL	00042730	16779487	1	1	1	1	0	1	1	1	1	0.878
Arquivos Brasileiros de Oftalmologia	Arquivos brasileiros de oftalmologia		Arquivos brasileiros de oftalmologia	Arquivos brasileiros de oftalmologia	Arquivos Brasileiros de Oftalmologia	ARQ BRAS OFTALMOL	00042749	16782925	1	1	1	1	0	1	1	1	1	0.379
Arquivos de Gastroenterologia	Arquivos de gastroenterologia		Arquivos de gastroenterologia	Arquivos de Gastroenterologia	Arquivos de Gastroenterologia		00042803	16784219	1	1	1	1	0	1	1	0	1
Arquivos de Neuro-Psiquiatria	Arquivos de neuro-psiquiatria		Arquivos de neuro-psiquiatria	Arquivos de Neuro-Psiquiatria	Arquivos de Neuro-Psiquiatria	ARQ NEURO-PSIQUIAT	0004282X	16784227	1	1	1	1	0	1	1	1	1	0.827
ARYA Atherosclerosis		ARYA Atherosclerosis	ARYA atherosclerosis	ARYA Atherosclerosis	ARYA Atherosclerosis Journal		17353955	22516638	1	1	1	0	1	1	1	0	1
Asian Journal of Epidemiology				Asian Journal of Epidemiology	Asian Journal of Epidemiology		19921462	2077205X	1	1	1	0	0	0	1	0	1
Asian Journal of Pharmaceutical and Clinical Research				Asian Journal of Pharmaceutical and Clinical Research	Asian Journal of Pharmaceutical and Clinical Research		09742441		1	1	1	0	0	0	1	0	1
Asian Journal of Pharmaceutical Research and Health Care				Asian Journal of Pharmaceutical Research and Health Care	Asian Journal of Pharmaceutical Research and Health Care		22501444	22501460	1	1	1	0	0	0	1	0	1
Asian Journal of Pharmaceutics				Asian Journal of Pharmaceutics	Asian Journal of Pharmaceutics		09738398	1998409X	1	1	1	0	0	0	1	0	1
ASN Neuro	ASN neuro	ASN NEURO	ASN neuro	ASN Neuro	ASN Neuro	ASN NEURO	17590914	17590914	1	1	1	1	1	1	1	1	1	3.638
Australasian Medical Journal		The Australasian Medical Journal	The Australasian medical journal	Australasian Medical Journal	Australasian Medical Journal		18361935	18361935	1	1	1	0	1	1	1	0	1
Australian Prescriber				Australian Prescriber	Australian Prescriber	AUST PRESCR	03128008	03128008	1	1	1	0	0	0	1	1	1	0.831
Autoimmune Diseases		Autoimmune Diseases	Autoimmune diseases	Autoimmune Diseases	Autoimmune Diseases		20900422	20900430	1	1	1	0	1	1	1	0	1
Avicenna Journal of Medical Biotechnology		Avicenna Journal of Medical Biotechnology	Avicenna journal of medical biotechnology	Avicenna Journal of Medical Biotechnology	Avicenna Journal of Medical Biotechnology		20082835	20084625	1	1	1	0	1	1	1	0	1
Balkan Journal of Medical Genetics		Balkan Journal of Medical Genetics : BJMG	Balkan journal of medical genetics : BJMG	Balkan Journal of Medical Genetics	Balkan Journal of Medical Genetics	BALK J MED GENET	13110160	13110160	1	1	1	0	1	1	1	1	1	0.077
Bangladesh Journal of Medical Science				Bangladesh Journal of Medical Science	Bangladesh Journal of Medical Science		22234721	20760299	1	1	1	0	0	0	1	0	1
Bangladesh Journal of Pharmacology				Bangladesh Journal of Pharmacology	Bangladesh Journal of Pharmacology	BANGL J PHARMACOL	1991007X	19910088	1	1	1	0	0	0	1	1	1	0.356
Behavioral and Brain Functions	Behavioral and brain functions : BBF	Behavioral and Brain Functions : BBF	Behavioral and brain functions : BBF	Behavioral and Brain Functions	Behavioral and Brain Functions	BEHAV BRAIN FUNCT	17449081	17449081	1	1	1	1	1	1	1	1	1	2.789
Biocell	Biocell : official journal of the Sociedades Latinoamericanas de Microscopía Electronica ... et. al		Biocell : official journal of the Sociedades Latinoamericanas de Microscopia Electronica ... et. al	Biocell	Biocell	BIOCELL	03279545	16675746	1	1	1	1	0	1	1	1	1	0.575
Biochemia Medica	Biochemia medica	Biochemia Medica	Biochemia medica	Biochemia Medica	Biochemia Medica	BIOCHEM MEDICA	13300962	18467482	1	1	1	1	1	1	1	1	1	1.873
BioData Mining		BioData Mining	BioData mining	BioData Mining	BioData Mining		17560381	17560381	1	1	1	0	1	1	1	0	1
BioImpacts		BioImpacts : BI	BioImpacts : BI	BioImpacts	BioImpacts		22285652	22285660	1	1	1	0	1	1	1	0	1
Bioinformatics and Biology Insights		Bioinformatics and Biology Insights	Bioinformatics and biology insights	Bioinformatics and Biology Insights	Bioinformatics and Biology Insights		11779322	11779322	1	1	1	0	1	1	1	0	1
Biointerphases	Biointerphases		Biointerphases	Biointerphases	Biointerphases	BIOINTERPHASES	19348630	19348630	1	1	1	1	0	1	1	1	1	1.905
Biological Procedures Online		Biological Procedures Online	Biological procedures online	Biological Procedures Online	Biological Procedures Online	BIOL PROCED ONLINE	14809222	14809222	1	1	1	0	1	1	1	1	1	0.95
Biological Research	Biological research		Biological research	Biological research	Biological Research	BIOL RES	07169760	07176287	1	1	1	1	0	1	1	1	1	1.129
Biologics: Targets and Therapy		Biologics : Targets &#x0026; Therapy	Biologics : targets & therapy	Biologics: Targets and Therapy	Biologics : Targets & Therapy		11775475	11775491	1	1	1	0	1	1	1	0	1
Biology Direct	Biology direct	Biology Direct	Biology direct	Biology direct	Biology Direct	BIOL DIRECT	17456150	17456150	1	1	1	1	1	1	1	1	1	2.72
Biomarker Insights		Biomarker Insights	Biomarker insights	Biomarker Insights	Biomarker Insights		11772719	11772719	1	1	1	0	1	1	1	0	1
Biomedica : revista del Instituto Nacional de Salud	Biomédica : revista del Instituto Nacional de Salud		Biomedica : revista del Instituto Nacional de Salud	Biomédica : revista del Instituto Nacional de Salud	BiomÃ©dica	BIOMEDICA	01204157	01204157	1	1	1	1	0	1	1	1	1	0.315
BioMedical Engineering Online	Biomedical engineering online	BioMedical Engineering OnLine	Biomedical engineering online	BioMedical Engineering OnLine	BioMedical Engineering OnLine	BIOMED ENG ONLINE	1475925X	1475925X	1	1	1	1	1	1	1	1	1	1.608
Biomedical Imaging and Intervention Journal		Biomedical Imaging and Intervention Journal	Biomedical imaging and intervention journal	Biomedical Imaging and Intervention Journal	Biomedical Imaging and Intervention Journal		18235530	18235530	1	1	1	0	1	1	1	0	1
Biomedical Journal	Biomedical journal		Biomedical journal	Biomedical Journal	Biomedical Journal		23194170	23202890	1	1	1	1	0	1	1	0	1
Biomedical Optics Express		Biomedical Optics Express	Biomedical optics express	Biomedical Optics Express	Biomedical Optics Express	BIOMED OPT EXPRESS	21567085	21567085	1	1	1	0	1	1	1	1	1	3.176
Biomedical Research	Biomedical research (Tokyo, Japan)		Biomedical research (Tokyo, Japan)	Biomedical Research (Japan)	Biomedical Research	BIOMED RES-TOKYO	03886107	1880313X	1	1	1	1	0	1	1	1	1	1.257
Biopolymers and Cell				Biopolymers and Cell	Biopolymers and Cell		02337657	19936842	1	1	1	0	0	0	1	0	1
Bioscience Reports	Bioscience reports	Bioscience Reports	Bioscience reports	Bioscience Reports	Bioscience Reports	BIOSCIENCE REP	01448463	15734935	1	1	1	1	1	1	1	1	1	1.876
Biosensors			Biosensors	Biosensors	Biosensors		20796374	20796374	1	1	1	0	0	1	1	0	1
Blood Cancer Journal		Blood Cancer Journal	Blood cancer journal	Blood Cancer Journal	Blood Cancer Journal	BLOOD CANCER J	20445385	20445385	1	1	1	0	1	1	1	1	1	1.4
Blood Transfusion	Blood transfusion = Trasfusione del sangue	Blood Transfusion	Blood transfusion = Trasfusione del sangue	Blood Transfusion	Blood Transfusion	BLOOD TRANSFUS-ITALY	17232007	17232007	1	1	1	1	1	1	1	1	1	1.858
BMB reports	BMB reports		BMB reports	BMB reports	BMB Reports	BMB REP	19766696	1976670X	1	1	1	1	0	1	1	1	1	1.634
BMC Anesthesiology		BMC Anesthesiology	BMC anesthesiology	BMC Anesthesiology	BMC Anesthesiology	BMC ANESTHESIOL	14712253	14712253	1	1	1	0	1	1	1	1	1	1.188
BMC Biochemistry	BMC biochemistry	BMC Biochemistry	BMC biochemistry	BMC Biochemistry	BMC Biochemistry	BMC BIOCHEM	14712091	14712091	1	1	1	1	1	1	1	1	1	1.776
BMC Bioinformatics	BMC bioinformatics	BMC Bioinformatics	BMC bioinformatics	BMC bioinformatics	BMC Bioinformatics	BMC BIOINFORMATICS	14712105	14712105	1	1	1	1	1	1	1	1	1	3.024
BMC Biology	BMC biology	BMC Biology	BMC biology	BMC biology	BMC Biology	BMC BIOL	17417007	17417007	1	1	1	1	1	1	1	1	1	6.531
BMC Biotechnology	BMC biotechnology	BMC Biotechnology	BMC biotechnology	BMC Biotechnology	BMC Biotechnology	BMC BIOTECHNOL	14726750	14726750	1	1	1	1	1	1	1	1	1	2.165
BMC Cancer	BMC cancer	BMC Cancer	BMC cancer	BMC Cancer	BMC Cancer	BMC CANCER	14712407	14712407	1	1	1	1	1	1	1	1	1	3.333
BMC Cardiovascular Disorders	BMC cardiovascular disorders	BMC Cardiovascular Disorders	BMC cardiovascular disorders	BMC Cardiovascular Disorders	BMC Cardiovascular Disorders	BMC CARDIOVASC DISOR	14712261	14712261	1	1	1	1	1	1	1	1	1	1.457
BMC Cell Biology	BMC cell biology	BMC Cell Biology	BMC cell biology	BMC Cell Biology	BMC Cell Biology	BMC CELL BIOL	14712121	14712121	1	1	1	1	1	1	1	1	1	2.808
BMC Clinical Pathology		BMC Clinical Pathology	BMC clinical pathology	BMC Clinical Pathology	BMC Clinical Pathology		14726890	14726890	1	1	1	0	1	1	1	0	1
BMC Complementary and Alternative Medicine	BMC complementary and alternative medicine	BMC Complementary and Alternative Medicine	BMC complementary and alternative medicine	BMC Complementary and Alternative Medicine	BMC Complementary and Alternative Medicine	BMC COMPLEM ALTERN M	14726882	14726882	1	1	1	1	1	1	1	1	1	2.082
BMC Dermatology	BMC dermatology	BMC Dermatology	BMC dermatology	BMC Dermatology	BMC Dermatology		14715945	14715945	1	1	1	1	1	1	1	0	1
BMC Developmental Biology	BMC developmental biology	BMC Developmental Biology	BMC developmental biology	BMC developmental biology	BMC Developmental Biology	BMC DEV BIOL	1471213X	1471213X	1	1	1	1	1	1	1	1	1	2.728
BMC Ear, Nose and Throat Disorders		BMC Ear, Nose, and Throat Disorders	BMC ear, nose, and throat disorders	BMC Ear, Nose and Throat Disorders	BMC Ear, Nose and Throat Disorders		14726815	14726815	1	1	1	0	1	1	1	0	1
BMC Ecology	BMC ecology	BMC Ecology	BMC ecology	BMC ecology	BMC Ecology		14726785	14726785	1	1	1	1	1	1	1	0	1
BMC Emergency Medicine	BMC emergency medicine	BMC Emergency Medicine	BMC emergency medicine	BMC Emergency Medicine	BMC Emergency Medicine		1471227X	1471227X	1	1	1	1	1	1	1	0	1
BMC Endocrine Disorders		BMC Endocrine Disorders	BMC endocrine disorders	BMC Endocrine Disorders	BMC Endocrine Disorders	BMC ENDOCR DISORD	14726823	14726823	1	1	1	0	1	1	1	1	1	2.65
BMC Evolutionary Biology	BMC evolutionary biology	BMC Evolutionary Biology	BMC evolutionary biology	BMC evolutionary biology	BMC Evolutionary Biology	BMC EVOL BIOL	14712148	14712148	1	1	1	1	1	1	1	1	1	3.285
BMC Family Practice	BMC family practice	BMC Family Practice	BMC family practice	BMC family practice	BMC Family Practice	BMC FAM PRACT	14712296	14712296	1	1	1	1	1	1	1	1	1	1.609
BMC Gastroenterology	BMC gastroenterology	BMC Gastroenterology	BMC gastroenterology	BMC Gastroenterology	BMC Gastroenterology	BMC GASTROENTEROL	1471230X	1471230X	1	1	1	1	1	1	1	1	1	2.11
BMC Genetics	BMC genetics	BMC Genetics	BMC genetics	BMC Genetics	BMC Genetics	BMC GENET	14712156	14712156	1	1	1	1	1	1	1	1	1	2.808
BMC Genomics	BMC genomics	BMC Genomics	BMC genomics	BMC Genomics	BMC Genomics	BMC GENOMICS	14712164	14712164	1	1	1	1	1	1	1	1	1	4.397
BMC Geriatrics	BMC geriatrics	BMC Geriatrics	BMC geriatrics	BMC geriatrics	BMC Geriatrics	BMC GERIATR	14712318	14712318	1	1	1	1	1	1	1	1	1	1.967
BMC Health Services Research	BMC health services research	BMC Health Services Research	BMC health services research	BMC health services research	BMC Health Services Research	BMC HEALTH SERV RES	14726963	14726963	1	1	1	1	1	1	1	1	1	1.773
BMC Immunology	BMC immunology	BMC Immunology	BMC immunology	BMC Immunology	BMC Immunology	BMC IMMUNOL	14712172	14712172	1	1	1	1	1	1	1	1	1	2.61
BMC Infectious Diseases	BMC infectious diseases	BMC Infectious Diseases	BMC infectious diseases	BMC Infectious Diseases	BMC Infectious Diseases	BMC INFECT DIS	14712334	14712334	1	1	1	1	1	1	1	1	1	3.025
BMC International Health and Human Rights	BMC international health and human rights	BMC International Health and Human Rights	BMC international health and human rights	BMC International Health and Human Rights	BMC International Health and Human Rights	BMC INT HEALTH HUM R	1472698X	1472698X	1	1	1	1	1	1	1	1	1	1
BMC Medical Education	BMC medical education	BMC Medical Education	BMC medical education	BMC medical education	BMC Medical Education	BMC MED EDUC	14726920	14726920	1	1	1	1	1	1	1	1	1	1.409
BMC Medical Ethics	BMC medical ethics	BMC Medical Ethics	BMC medical ethics	BMC medical ethics	BMC Medical Ethics	BMC MED ETHICS	14726939	14726939	1	1	1	1	1	1	1	1	1	1.705
BMC Medical Genetics	BMC medical genetics	BMC Medical Genetics	BMC medical genetics	BMC Medical Genetics	BMC Medical Genetics	BMC MED GENET	14712350	14712350	1	1	1	1	1	1	1	1	1	2.536
BMC Medical Genomics	BMC medical genomics	BMC Medical Genomics	BMC medical genomics	BMC Medical Genomics	BMC Medical Genomics	BMC MED GENOMICS	17558794	17558794	1	1	1	1	1	1	1	1	1	3.466
BMC Medical Imaging	BMC medical imaging	BMC Medical Imaging	BMC medical imaging	BMC medical imaging	BMC Medical Imaging		14712342	14712342	1	1	1	1	1	1	1	0	1
BMC Medical Informatics and Decision Making	BMC medical informatics and decision making	BMC Medical Informatics and Decision Making	BMC medical informatics and decision making	BMC medical informatics and decision making	BMC Medical Informatics and Decision Making	BMC MED INFORM DECIS	14726947	14726947	1	1	1	1	1	1	1	1	1	1.603
BMC Medical Physics		BMC Medical Physics	BMC medical physics	BMC Medical Physics	BMC Medical Physics		17566649	17566649	1	1	1	0	1	1	1	0	1
BMC Medical Research Methodology	BMC medical research methodology	BMC Medical Research Methodology	BMC medical research methodology	BMC medical research methodology	BMC Medical Research Methodology	BMC MED RES METHODOL	14712288	14712288	1	1	1	1	1	1	1	1	1	2.211
BMC Medicine	BMC medicine	BMC Medicine	BMC medicine	BMC Medicine	BMC Medicine	BMC MED	17417015	17417015	1	1	1	1	1	1	1	1	1	6.679
BMC Microbiology	BMC microbiology	BMC Microbiology	BMC microbiology	BMC Microbiology	BMC Microbiology	BMC MICROBIOL	14712180	14712180	1	1	1	1	1	1	1	1	1	3.104
BMC Molecular Biology	BMC molecular biology	BMC Molecular Biology	BMC molecular biology	BMC Molecular Biology	BMC Molecular Biology	BMC MOL BIOL	14712199	14712199	1	1	1	1	1	1	1	1	1	2.796
BMC Musculoskeletal Disorders	BMC musculoskeletal disorders	BMC Musculoskeletal Disorders	BMC musculoskeletal disorders	BMC Musculoskeletal Disorders	BMC Musculoskeletal Disorders	BMC MUSCULOSKEL DIS	14712474	14712474	1	1	1	1	1	1	1	1	1	1.875
BMC Nephrology	BMC nephrology	BMC Nephrology	BMC nephrology	BMC Nephrology	BMC Nephrology	BMC NEPHROL	14712369	14712369	1	1	1	1	1	1	1	1	1	1.644
BMC Neurology	BMC neurology	BMC Neurology	BMC neurology	BMC Neurology	BMC Neurology	BMC NEUROL	14712377	14712377	1	1	1	1	1	1	1	1	1	2.564
BMC Neuroscience	BMC neuroscience	BMC Neuroscience	BMC neuroscience	BMC Neuroscience	BMC Neuroscience	BMC NEUROSCI	14712202	14712202	1	1	1	1	1	1	1	1	1	3
BMC Ophthalmology	BMC ophthalmology	BMC Ophthalmology	BMC ophthalmology	BMC ophthalmology	BMC Ophthalmology	BMC OPHTHALMOL	14712415	14712415	1	1	1	1	1	1	1	1	1	1.444
BMC Oral Health	BMC oral health	BMC Oral Health	BMC oral health	BMC oral health	BMC Oral Health	BMC ORAL HEALTH	14726831	14726831	1	1	1	1	1	1	1	1	1	1.339
BMC Palliative Care		BMC Palliative Care	BMC palliative care	BMC Palliative Care	BMC Palliative Care		1472684X	1472684X	1	1	1	0	1	1	1	0	1
BMC pharmacology & toxicology	BMC pharmacology & toxicology	BMC Pharmacology &#x0026; Toxicology	BMC pharmacology & toxicology	BMC Pharmacology and Toxicology	BMC Pharmacology and Toxicology		20506511	20506511	1	1	1	1	1	1	1	0	1
BMC Physiology	BMC physiology	BMC Physiology	BMC physiology	BMC physiology	BMC Physiology		14726793	14726793	1	1	1	1	1	1	1	0	1
BMC Plant Biology	BMC plant biology	BMC Plant Biology	BMC plant biology	BMC plant biology	BMC Plant Biology	BMC PLANT BIOL	14712229	14712229	1	1	1	1	1	1	1	1	1	4.354
BMC Pregnancy and Childbirth	BMC pregnancy and childbirth	BMC Pregnancy and Childbirth	BMC pregnancy and childbirth	BMC Pregnancy and Childbirth	BMC Pregnancy and Childbirth	BMC PREGNANCY CHILDB	14712393	14712393	1	1	1	1	1	1	1	1	1	2.516
BMC Proceedings		BMC Proceedings	BMC proceedings	BMC Proceedings	BMC Proceedings		17536561	17536561	1	1	1	0	1	1	1	0	1
BMC Psychiatry	BMC psychiatry	BMC Psychiatry	BMC psychiatry	BMC Psychiatry	BMC Psychiatry	BMC PSYCHIATRY	1471244X	1471244X	1	1	1	1	1	1	1	1	1	2.233
BMC Public Health	BMC public health	BMC Public Health	BMC public health	BMC public health	BMC Public Health	BMC PUBLIC HEALTH	14712458	14712458	1	1	1	1	1	1	1	1	1	2.076
BMC Pulmonary Medicine	BMC pulmonary medicine	BMC Pulmonary Medicine	BMC pulmonary medicine	BMC Pulmonary Medicine	BMC Pulmonary Medicine	BMC PULM MED	14712466	14712466	1	1	1	1	1	1	1	1	1	2.76
BMC Research Notes	BMC research notes	BMC Research Notes	BMC research notes	BMC research notes	BMC Research Notes		17560500	17560500	1	1	1	1	1	1	1	0	1
BMC Structural Biology	BMC structural biology	BMC Structural Biology	BMC structural biology	BMC Structural Biology	BMC Structural Biology	BMC STRUCT BIOL	14726807	14726807	1	1	1	1	1	1	1	1	1	2.099
BMC Surgery	BMC surgery	BMC Surgery	BMC surgery	BMC surgery	BMC Surgery	BMC SURG	14712482	14712482	1	1	1	1	1	1	1	1	1	1.973
BMC Systems Biology	BMC systems biology	BMC Systems Biology	BMC systems biology	BMC systems biology	BMC Systems Biology	BMC SYST BIOL	17520509	17520509	1	1	1	1	1	1	1	1	1	2.982
BMC Urology	BMC urology	BMC Urology	BMC urology	BMC Urology	BMC Urology	BMC UROL	14712490	14712490	1	1	1	1	1	1	1	1	1	1.694
BMC Veterinary Research	BMC veterinary research	BMC Veterinary Research	BMC veterinary research	BMC veterinary research	BMC Veterinary Research	BMC VET RES	17466148	17466148	1	1	1	1	1	1	1	1	1	1.861
BMC Women's Health	BMC women's health	BMC Women's Health	BMC women's health	BMC Women's Health	BMC Women's Health	BMC WOMENS HEALTH	14726874	14726874	1	1	1	1	1	1	1	1	1	1.505
BMJ Open		BMJ Open	BMJ open	BMJ Open	BMJ Open	BMJ OPEN	20446055	20446055	1	1	1	0	1	1	1	1	1	1.583
Boletin Latinoamericano y del Caribe de Plantas Medicinales y Aromaticas				Boletin Latinoamericano y del Caribe de Plantas Medicinales y Aromaticas	BoletÃ­n Latinoamericano y del Caribe de Plantas Medicinales y AromÃ¡ticas	B LATINOAM CARIBE PL	07177917	07177917	1	1	1	0	0	0	1	1	1	0.624
Bosnian journal of basic medical sciences	Bosnian journal of basic medical sciences / Udru?enje basi?nih mediciniskih znanosti = Association of Basic Medical Sciences		Bosnian journal of basic medical sciences / Udruzenje basicnih mediciniskih znanosti = Association of Basic Medical Sciences	Bosnian journal of basic medical sciences / Udru?enje basi?nih mediciniskih znanosti = Association of Basic Medical Sciences	Bosnian Journal of Basic Medical Sciences	BOSNIAN J BASIC MED	15128601	18404812	1	1	1	1	0	1	1	1	1	0.5
Brazilian Dental Journal	Brazilian dental journal		Brazilian dental journal	Brazilian dental journal	Brazilian Dental Journal		01036440	18064760	1	1	1	1	0	1	1	0	1
Brazilian journal of biology = Revista brasleira de biologia	Brazilian journal of biology = Revista brasleira de biologia		Brazilian journal of biology = Revista brasleira de biologia	Brazilian journal of biology = Revista brasleira de biologia	Brazilian Journal of Biology	BRAZ J BIOL	15196984	16784375	1	1	1	1	0	1	1	1	1	0.637
Brazilian Journal of Infectious Diseases	The Brazilian journal of infectious diseases : an official publication of the Brazilian Society of Infectious Diseases		The Brazilian journal of infectious diseases : an official publication of the Brazilian Society of Infectious Diseases	Brazilian Journal of Infectious Diseases	Brazilian Journal of Infectious Diseases	BRAZ J INFECT DIS	14138670	16784391	1	1	1	1	0	1	1	1	1	1.036
Brazilian Journal of Medical and Biological Research	Brazilian journal of medical and biological research = Revista brasileira de pesquisas médicas e biológicas / Sociedade Brasileira de Biofísica ... [et al.]	Brazilian Journal of Medical and Biological Research	Brazilian journal of medical and biological research = Revista brasileira de pesquisas medicas e biologicas / Sociedade Brasileira de Biofisica ... [et al.]	Brazilian Journal of Medical and Biological Research	Brazilian Journal of Medical and Biological Research	BRAZ J MED BIOL RES	0100879X	16784510	1	1	1	1	1	1	1	1	1	1.139
Brazilian Journal of Microbiology	Brazilian journal of microbiology : [publication of the Brazilian Society for Microbiology]	Brazilian Journal of Microbiology	Brazilian journal of microbiology : [publication of the Brazilian Society for Microbiology]	Brazilian journal of microbiology : [publication of the Brazilian Society for Microbiology]	Brazilian Journal of Microbiology	BRAZ J MICROBIOL	15178382	16784405	1	1	1	1	1	1	1	1	1	0.762
Revista brasileira de otorrinolaringologia (English ed.)	Brazilian journal of otorhinolaryngology		Brazilian journal of otorhinolaryngology	Brazilian journal of otorhinolaryngology	Brazilian Journal of Otorhinolaryngology	BRAZ J OTORHINOLAR	18088694	18088686	1	1	1	1	0	1	1	1	1	0.545
Brazilian Journal of Pharmaceutical Sciences				Brazilian Journal of Pharmaceutical Sciences	Brazilian Journal of Pharmaceutical Sciences	BRAZ J PHARM SCI	19848250	21759790	1	1	1	0	0	0	1	1	1	0.373
Brazilian Journal of Pharmacognsosy				Brazilian Journal of Pharmacognosy	Revista Brasileira de Farmacognosia	REV BRAS FARMACOGN	0102695X	1981528X	1	1	1	0	0	0	1	1	1	0.676
Revista Brasileira de Fisioterapia	Brazilian journal of physical therapy		Brazilian journal of physical therapy	Brazilian journal of physical therapy	Revista Brasileira de Fisioterapia	REV BRAS FISIOTER	14133555	18099246	1	1	1	1	0	1	1	1	1	1
Breast Cancer: Basic and Clinical Research		Breast Cancer : Basic and Clinical Research	Breast cancer : basic and clinical research	Breast Cancer: Basic and Clinical Research	Breast Cancer : Basic and Clinical Research		11782234	11782234	1	1	1	0	1	1	1	0	1
Breast Cancer: Targets and Therapy		Breast Cancer : Targets and Therapy	Breast cancer (Dove Medical Press)	Breast Cancer: Targets and Therapy	Breast Cancer : Targets and Therapy		11791314	11791314	1	1	1	0	1	1	1	0	1
British Journal of Medical Practitioners				British Journal of Medical Practitioners	British Journal of Medical Practitioners		17578515		1	1	1	0	0	0	1	0	1
Cadernos de Saude Publica	Cadernos de saúde pública		Cadernos de saude publica	Cadernos de saúde pública	Cadernos de SaÃºde PÃºblica	CAD SAUDE PUBLICA	0102311X	16784464	1	1	1	1	0	1	1	1	1	0.826
Canadian Family Physician	Canadian family physician Médecin de famille canadien	Canadian Family Physician	Canadian family physician Medecin de famille canadien	Canadian Family Physician	Canadian Family Physician	CAN FAM PHYSICIAN	0008350X	17155258	1	1	1	1	1	1	1	1	1	1.808
Canadian journal of rural medicine : the official journal of the Society of Rural Physicians of Canada = Journal canadien de la medecine rurale : le journal officiel de la Societe de medecine rurale du Canada	Canadian journal of rural medicine : the official journal of the Society of Rural Physicians of Canada = Journal canadien de la médecine rurale : le journal officiel de la Société de médecine rurale du Canada		Canadian journal of rural medicine : the official journal of the Society of Rural Physicians of Canada = Journal canadien de la medecine rurale : le journal officiel de la Societe de medecine rurale du Canada	Canadian journal of rural medicine : the official journal of the Society of Rural Physicians of Canada = Journal canadien de la médecine rurale : le journal officiel de la Société de médecine rurale du Canada	Canadian Journal of Rural Medicine		12037796	1488237X	1	1	1	1	0	1	1	0	1
Cancer Biology and Medicine		Cancer Biology &#x0026; Medicine	Cancer biology & medicine	Cancer Biology and Medicine	Cancer Biology & Medicine		20953941		1	1	1	0	1	1	1	0	1
Cancer Cell International		Cancer Cell International	Cancer cell international	Cancer Cell International	Cancer Cell International	CANCER CELL INT	14752867	14752867	1	1	1	0	1	1	1	1	1	2.093
Cancer Control	Cancer control : journal of the Moffitt Cancer Center		Cancer control : journal of the Moffitt Cancer Center	Cancer Control	Cancer Control : Journal of the Moffitt Cancer Center	CANCER CONTROL	10732748	15262359	1	1	1	1	0	1	1	1	1	3.593
Cancer Informatics		Cancer Informatics	Cancer informatics	Cancer Informatics	Cancer Informatics		11769351	11769351	1	1	1	0	1	1	1	0	1
Cancers		Cancers	Cancers	Cancers	Cancers		20726694	20726694	1	1	1	0	1	1	1	0	1
Cardiology Research and Practice		Cardiology Research and Practice	Cardiology research and practice	Cardiology Research and Practice	Cardiology Research and Practice		20908016	20900597	1	1	1	0	1	1	1	0	1
Cardiovascular Diabetology	Cardiovascular diabetology	Cardiovascular Diabetology	Cardiovascular diabetology	Cardiovascular Diabetology	Cardiovascular Diabetology	CARDIOVASC DIABETOL	14752840	14752840	1	1	1	1	1	1	1	1	1	4.209
Cardiovascular Psychiatry and Neurology		Cardiovascular Psychiatry and Neurology	Cardiovascular psychiatry and neurology	Cardiovascular Psychiatry and Neurology	Cardiovascular Psychiatry and Neurology		20900163	20900171	1	1	1	0	1	1	1	0	1
Cardiovascular Ultrasound	Cardiovascular ultrasound	Cardiovascular Ultrasound	Cardiovascular ultrasound	Cardiovascular Ultrasound	Cardiovascular Ultrasound	CARDIOVASC ULTRASOUN	14767120	14767120	1	1	1	1	1	1	1	1	1	1.32
Case Reports in Dermatology		Case Reports in Dermatology	Case reports in dermatology	Case Reports in Dermatology	Case Reports in Dermatology		16626567	16626567	1	1	1	0	1	1	1	0	1
Case Reports in Gastroenterology		Case Reports in Gastroenterology	Case reports in gastroenterology	Case Reports in Gastroenterology	Case Reports in Gastroenterology		16620631	16620631	1	1	1	0	1	1	1	0	1
Case Reports in Neurology		Case Reports in Neurology	Case reports in neurology	Case Reports in Neurology	Case Reports in Neurology		1662680X	1662680X	1	1	1	0	1	1	1	0	1
Case Reports in Oncology		Case Reports in Oncology	Case reports in oncology	Case Reports in Oncology	Case Reports in Oncology		16626575	16626575	1	1	1	0	1	1	1	0	1
Case Reports in Ophthalmology		Case Reports in Ophthalmology	Case reports in ophthalmology	Case Reports in Ophthalmology	Case Reports in Ophthalmology		16632699	16632699	1	1	1	0	1	1	1	0	1
CBE Life Sciences Education	CBE life sciences education	CBE Life Sciences Education	CBE life sciences education	CBE life sciences education	CBE : Life Sciences Education	CBE-LIFE SCI EDUC	19317913	19317913	1	1	1	1	1	1	1	1	1	1.188
Cell Death and Disease	Cell death & disease	Cell Death &#x0026; Disease	Cell death & disease	Cell Death and Disease	Cell Death and Disease	CELL DEATH DIS	20414889	20414889	1	1	1	1	1	1	1	1	1	6.044
Cell Health and Cytoskeleton			Cell health and cytoskeleton	Cell Health and Cytoskeleton	Cell Health and Cytoskeleton		11791330	11791330	1	1	1	0	0	1	1	0	1
Cell Journal		Cell Journal (Yakhteh)	Cell journal	Cell Journal	Cell Journal	CELL J	22285806	22285814	1	1	1	0	1	1	1	1	1	0.233
Cell Reports	Cell reports		Cell reports	Cell Reports	Cell Reports	CELL REP	22111247	22111247	1	1	1	1	0	1	1	1	1
Cell Structure and Function	Cell structure and function		Cell structure and function	Cell Structure and Function	Cell Structure and Function	CELL STRUCT FUNCT	03867196	13473700	1	1	1	1	0	1	1	1	1	1.647
Cellular Physiology and Biochemistry	Cellular physiology and biochemistry : international journal of experimental cellular physiology, biochemistry, and pharmacology	Cellular Physiology and Biochemistry	Cellular physiology and biochemistry : international journal of experimental cellular physiology, biochemistry, and pharmacology	Cellular Physiology and Biochemistry	Cellular Physiology and Biochemistry	CELL PHYSIOL BIOCHEM	10158987	14219778	1	1	1	1	1	1	1	1	1	3.415
Child and Adolescent Psychiatry and Mental Health		Child and Adolescent Psychiatry and Mental Health	Child and adolescent psychiatry and mental health	Child and Adolescent Psychiatry and Mental Health	Child and Adolescent Psychiatry and Mental Health		17532000	17532000	1	1	1	0	1	1	1	0	1
Ai zheng = Aizheng = Chinese journal of cancer	Chinese journal of cancer	Chinese Journal of Cancer	Chinese journal of cancer	Chinese Journal of Cancer	Chinese Journal of Cancer		1000467X	1944446X	1	1	1	1	1	1	1	0	1
Chinese Journal of Cancer Biotherapy				Chinese Journal of Cancer Biotherapy	Chinese Journal of Cancer Biotherapy		1007385X		1	1	1	0	0	0	1	0	0
Chinese Journal of Contemporary Neurology and Neurosurgery				Chinese Journal of Contemporary Neurology and Neurosurgery	Chinese Journal of Contemporary Neurology and Neurosurgery		16726731		1	1	1	0	0	0	1	0	0
Chinese Medical Journal	Chinese medical journal		Chinese medical journal	Chinese Medical Journal	Chinese Medical Journal	CHINESE MED J-PEKING	03666999	03666999	1	1	1	1	0	1	1	1	1	0.901
Chinese Medicine		Chinese Medicine	Chinese medicine	Chinese Medicine (United Kingdom)	Chinese Medicine		17498546	17498546	1	1	1	0	1	1	1	0	1
Chiropractic and Manual Therapies		Chiropractic &#x0026; Manual Therapies	Chiropractic & manual therapies	Chiropractic and Manual Therapies	Chiropractic and Manual Therapies		2045709X	2045709X	1	1	1	0	1	1	1	0	1
Cholesterol		Cholesterol	Cholesterol	Cholesterol	Cholesterol		20901283	20901291	1	1	1	0	1	1	1	0	1
Chronic diseases and injuries in Canada	Chronic diseases and injuries in Canada		Chronic diseases and injuries in Canada	Chronic diseases and injuries in Canada	Chronic Diseases and Injuries in Canada	CHRON DIS INJ CAN	19256515	19256523	1	1	1	1	0	1	1	1	1	0.684
Ciencia e Saude Coletiva	Ciência & saúde coletiva		Ciencia & saude coletiva	Ciência & saúde coletiva	CiÃªncia & SaÃºde Coletiva	CIENC SAUDE COLETIVA	14138123	16784561	1	1	1	1	0	1	1	1	1	0.425
Circulation Journal	Circulation journal : official journal of the Japanese Circulation Society		Circulation journal : official journal of the Japanese Circulation Society	Circulation Journal	Circulation Journal	CIRC J	13469843	13474820	1	1	1	1	0	1	1	1	1	3.578
Cirugia y Cirujanos	Cirugia y cirujanos		Cirugia y cirujanos	Cirugia y cirujanos	CirugÃ­a y cirujanos : Ã?rgano Oficial de la Academia Mexicana de CirugÃ­a	CIR CIR	00097411	00097411	1	1	1	1	0	1	1	1	0	0.316
Cleveland Clinic Journal of Medicine	Cleveland Clinic journal of medicine		Cleveland Clinic journal of medicine	Cleveland Clinic journal of medicine	Cleveland Clinic Journal of Medicine	CLEV CLIN J MED	08911150	19392869	1	1	1	1	0	1	1	1	1	3.4
Clinical and Molecular Allergy		Clinical and Molecular Allergy : CMA	Clinical and molecular allergy : CMA	Clinical and Molecular Allergy	Clinical and Molecular Allergy		14767961	14767961	1	1	1	0	1	1	1	0	1
Clinical and molecular hepatology	Clinical and molecular hepatology	Clinical and Molecular Hepatology	Clinical and molecular hepatology	Clinical and molecular hepatology	Clinical and Molecular Hepatology		22872728	2287285X	1	1	1	1	1	1	1	0	1
Clinical and Translational Gastroenterology		Clinical and Translational Gastroenterology	Clinical and translational gastroenterology	Clinical and Translational Gastroenterology	Clinical and Translational Gastroenterology		2155384X	2155384X	1	1	1	0	1	1	1	0	1
Clinical Epigenetics		Clinical Epigenetics	Clinical epigenetics	Clinical Epigenetics	Clinical Epigenetics		18687083	18687083	1	1	1	0	1	1	1	0	1
Clinical interventions in aging	Clinical interventions in aging	Clinical Interventions in Aging	Clinical interventions in aging	Clinical Interventions in Aging	Clinical Interventions in Aging	CLIN INTERV AGING	11769092	11781998	1	1	1	1	1	1	1	1	1	2.651
Clinical Medicine and Research	Clinical medicine & research	Clinical Medicine &#x0026; Research	Clinical medicine & research	Clinical Medicine and Research	Clinical Medicine & Research		15394182	15546179	1	1	1	1	1	1	1	0	1
Clinical Medicine Insights: Arthritis and Musculoskeletal Disorders		Clinical Medicine Insights. Arthritis and Musculoskeletal Disorders	Clinical medicine insights. Arthritis and musculoskeletal disorders	Clinical Medicine Insights: Arthritis and Musculoskeletal Disorders	Clinical Medicine Insights : Arthritis and Musculoskeletal Disorders		11795441	11795441	1	1	1	0	1	1	1	0	1
Clinical Medicine Insights: Blood Disorders				Clinical Medicine Insights: Blood Disorders	Clinical Medicine Insights : Blood Disorders		1179545X	1179545X	1	1	1	0	0	0	1	0	1
Clinical Medicine Insights: Cardiology		Clinical Medicine Insights. Cardiology	Clinical Medicine Insights. Cardiology	Clinical Medicine Insights: Cardiology	Clinical Medicine Insights : Cardiology		11795468	11795468	1	1	1	0	1	1	1	0	1
Clinical Medicine Insights: Case Reports		Clinical Medicine Insights. Case Reports	Clinical medicine insights. Case reports	Clinical Medicine Insights: Case Reports	Clinical Medicine Insights : Case Reports		11795476	11795476	1	1	1	0	1	1	1	0	1
Clinical Medicine Insights: Circulatory, Respiratory and Pulmonary Medicine		Clinical Medicine Insights. Circulatory, Respiratory and Pulmonary Medicine	Clinical medicine insights. Circulatory, respiratory and pulmonary medicine	Clinical Medicine Insights: Circulatory, Respiratory and Pulmonary Medicine	Clinical Medicine Insights: Circulatory, Respiratory and Pulmonary Medicine		11795484	11795484	1	1	1	0	1	1	1	0	1
Clinical Medicine Insights: Gastroenterology		Clinical Medicine Insights. Gastroenterology	Clinical medicine insights. Gastroenterology	Clinical Medicine Insights: Gastroenterology	Clinical Medicine Insights : Gastroenterology		11795522	11795522	1	1	1	0	1	1	1	0	1
Clinical Medicine Insights: Oncology		Clinical Medicine Insights. Oncology	Clinical Medicine Insights. Oncology	Clinical Medicine Insights: Oncology	Clinical Medicine Insights : Oncology		11795549	11795549	1	1	1	0	1	1	1	0	1
Clinical Medicine Insights: Pathology		Clinical Medicine Insights. Pathology	Clinical medicine insights. Pathology	Clinical Medicine Insights: Pathology	Clinical Medicine Insights : Pathology		11795557	11795557	1	1	1	0	1	1	1	0	1
Clinical Medicine Insights: Therapeutics			Clinical medicine insights. Therapeutics	Clinical Medicine Insights: Therapeutics	Clinical Medicine Insights : Therapeutics		1179559X	1179559X	1	1	1	0	0	1	1	0	1
Clinical Neuropsychiatry				Clinical Neuropsychiatry	Clincal Neuropsychiatry		17244935		1	1	1	0	0	0	1	0	1
Clinical Pediatric Endocrinology		Clinical Pediatric Endocrinology	Clinical pediatric endocrinology : case reports and clinical investigations : official journal of the Japanese Society for Pediatric Endocrinology	Clinical Pediatric Endocrinology	Clinical Pediatric Endocrinology		09185739	13477358	1	1	1	0	1	1	1	0	1
Clinical Practice and Epidemiology in Mental Health		Clinical Practice and Epidemiology in Mental Health : CP &#x0026; EMH	Clinical practice and epidemiology in mental health : CP & EMH	Clinical Practice and Epidemiology in Mental Health	Clinical Practice and Epidemiology in Mental Health		17450179	17450179	1	1	1	0	1	1	1	0	1
Clinical Proteomics		Clinical proteomics	Clinical proteomics	Clinical Proteomics	Clinical Proteomics		15590275	15590275	1	1	1	0	1	1	1	0	1
Clinical, Cosmetic and Investigational Dermatology		Clinical, Cosmetic and Investigational Dermatology	Clinical, cosmetic and investigational dermatology	Clinical, Cosmetic and Investigational Dermatology	Clinical, Cosmetic and Investigational Dermatology		11787015	11787015	1	1	1	0	1	1	1	0	1
Clinics	Clinics (São Paulo, Brazil)	Clinics	Clinics (Sao Paulo, Brazil)	Clinics (São Paulo, Brazil)	Clinics		18075932	19805322	1	1	1	1	1	1	1	0	1
Cocuk Enfeksiyon Dergisi				Cocuk Enfeksiyon Dergisi	Cocuk Enfeksiyon Dergisi		13071068	13085271	1	1	1	0	0	0	1	0	0
Cocuk Sagligi ve Hastaliklari Dergisi				Cocuk Sagligi ve Hastaliklari Dergisi	Ã?ocuk SaÄ?lÄ±Ä?Ä± ve HastalÄ±klarÄ± Dergisi		00100161		1	1	1	0	0	0	1	0	0
Colombia Medica				Colombia Medica	Colombia MÃ©dica	COLOMB MEDICA	01208322	16579534	1	1	1	0	0	0	1	1	0	0.094
Computational and Mathematical Methods in Medicine	Computational and mathematical methods in medicine	Computational and Mathematical Methods in Medicine	Computational and mathematical methods in medicine	Computational and Mathematical Methods in Medicine	Computational and Mathematical Methods in Medicine	COMPUT MATH METHOD M	1748670X	17486718	1	1	1	1	1	1	1	1	1	0.791
Computational Intelligence and Neuroscience	Computational intelligence and neuroscience	Computational Intelligence and Neuroscience	Computational intelligence and neuroscience	Computational intelligence and neuroscience	Computational Intelligence and Neuroscience		16875265	16875273	1	1	1	1	1	1	1	0	1
Core Evidence		Core Evidence	Core evidence	Core Evidence	Core Evidence		15551741	1555175X	1	1	1	0	1	1	1	0	1
Cost Effectiveness and Resource Allocation		Cost Effectiveness and Resource Allocation : C/E	Cost effectiveness and resource allocation : C/E	Cost Effectiveness and Resource Allocation	Cost Effectiveness and Resource Allocation		14787547	14787547	1	1	1	0	1	1	1	0	1
Cough		Cough (London, England)	Cough (London, England)	Cough	Cough		17459974	17459974	1	1	1	0	1	1	1	0	1
CPT: Pharmacometrics and Systems Pharmacology		CPT: Pharmacometrics &#x0026; Systems Pharmacology	CPT: pharmacometrics & systems pharmacology	CPT: Pharmacometrics and Systems Pharmacology	CPT: Pharmacometrics & Systems Pharmacology		21638306	21638306	1	1	1	0	1	1	1	0	1
Critical Ultrasound Journal		Critical Ultrasound Journal	Critical ultrasound journal	Critical Ultrasound Journal	Critical Ultrasound Journal		20363176	20367902	1	1	1	0	1	1	1	0	1
Croatian Medical Journal	Croatian medical journal	Croatian Medical Journal	Croatian medical journal	Croatian Medical Journal	Croatian Medical Journal	CROAT MED J	03539504	13328166	1	1	1	1	1	1	1	1	1	1.25
Cuadernos de bioética : revista oficial de la Asociación Española de Bioética y Ética Médica	Cuadernos de bioética : revista oficial de la Asociación Española de Bioética y Ética Médica		Cuadernos de bioetica : revista oficial de la Asociacion Espanola de Bioetica y Etica Medica	Cuadernos de bioética : revista oficial de la Asociación Española de Bioética y Ética Médica	Cuadernos de BioÃ©tica		11321989		1	1	1	1	0	1	1	0	1
Current Issues in Molecular Biology	Current issues in molecular biology		Current issues in molecular biology	Current Issues in Molecular Biology	Current Issues in Molecular Biology	CURR ISSUES MOL BIOL	14673037	14673045	1	1	1	1	0	1	1	1	1	3.65
Current Oncology		Current Oncology	Current oncology (Toronto, Ont.)	Current Oncology	Current Oncology	CURR ONCOL	11980052	17187729	1	1	1	0	1	1	1	1	1	1.625
Current Trends in Biotechnology and Pharmacy			Current trends in biotechnology and pharmacy	Current Trends in Biotechnology and Pharmacy	Current Trends in Biotechnology and Pharmacy		09738916	22307303	1	1	1	0	0	1	1	0	1
CytoJournal		CytoJournal	CytoJournal	CytoJournal	CytoJournal	CYTOJOURNAL	09745963	17426413	1	1	1	0	1	1	1	1	1	1.2
Danish Medical Journal	Danish medical journal		Danish medical journal	Danish Medical Journal	Danish Medical Journal	DAN MED J	22451919	22451919	1	1	1	1	0	1	1	1	1
Daru		DARU Journal of Pharmaceutical Sciences	Daru : journal of Faculty of Pharmacy, Tehran University of Medical Sciences	DARU, Journal of Pharmaceutical Sciences	DARU : Journal of Pharmaceutical Sciences	DARU	15608115	20082231	1	1	1	0	1	1	1	1	1	0.615
Database : the journal of biological databases and curation	Database : the journal of biological databases and curation	Database: The Journal of Biological Databases and Curation	Database : the journal of biological databases and curation	Database : the journal of biological databases and curation	Database : the Journal of Biological Databases and Curation	DATABASE-OXFORD	17580463	17580463	1	1	1	1	1	1	1	1	1	4.2
Dental and Medical Problems				Dental and Medical Problems	Dental and Medical Problems		1644387X		1	1	1	0	0	0	1	0	1
Dental Press Journal of Orthodontics	Dental press journal of orthodontics		Dental press journal of orthodontics	Dental press journal of orthodontics	Dental Press Journal of Orthodontics		21769451	21776709	1	1	1	1	0	1	1	0	1
Der Pharma Chemica				Der Pharma Chemica	Der Pharma Chemica		0975413X	0975413X	1	1	1	0	0	0	1	0	1
Der Pharmacia Lettre				Der Pharmacia Lettre	Der Pharmacia Lettre		09755071	09755071	1	1	1	0	0	0	1	0	1
Dermatologia Kliniczna				Dermatologia Kliniczna	Clinical Dermatology		17307201	20836074	1	1	1	0	0	0	1	0	1
Dermatology and Therapy		Dermatology and Therapy	Dermatology and therapy	Dermatology and Therapy	Dermatology and Therapy		21938210	21909172	1	1	1	0	1	1	1	0	1
Dermatology Online Journal	Dermatology online journal		Dermatology online journal	Dermatology Online Journal	Dermatology Online Journal		10872108	10872108	1	1	1	1	0	1	1	0	1
Dermatology Reports				Dermatology Reports	Dermatology Reports		20367392	20367406	1	1	1	0	0	0	1	0	1
Dermatology Research and Practice		Dermatology Research and Practice	Dermatology research and practice	Dermatology Research and Practice	Dermatology Research and Practice		16876105	16876113	1	1	1	0	1	1	1	0	1
Deutsches Ärzteblatt international	Deutsches Ärzteblatt international	Deutsches &#x000c4;rzteblatt International	Deutsches Arzteblatt international	Deutsches Arzteblatt International	Deutsches Ã?rzteblatt International	DTSCH ARZTEBL INT	18660452	18660452	1	1	1	1	1	1	1	1	1	3.542
Diabetes Therapy		Diabetes Therapy	Diabetes therapy : research, treatment and education of diabetes and related disorders	Diabetes Therapy	Diabetes Therapy		18696953	18696961	1	1	1	0	1	1	1	0	1
Diabetes, Metabolic Syndrome and Obesity: Targets and Therapy		Diabetes, Metabolic Syndrome and Obesity: Targets and Therapy	Diabetes, metabolic syndrome and obesity : targets and therapy	Diabetes, Metabolic Syndrome and Obesity: Targets and Therapy	Diabetes, Metabolic Syndrome and Obesity : Targets and Therapy		11787007	11787007	1	1	1	0	1	1	1	0	1
Diabetic Foot and Ankle		Diabetic Foot &#x0026; Ankle	Diabetic foot & ankle	Diabetic Foot and Ankle	Diabetic Foot & Ankle		2000625X	2000625X	1	1	1	0	1	1	1	0	1
Diabetic Hypoglycemia				Diabetic Hypoglycemia	Diabetic Hypoglycemia		17572428	17572428	1	1	1	0	0	0	1	0	1
Diabetologia Croatica			Diabetologia Croatica	Diabetologia Croatica	Diabetologia Croatica		03510042		1	1	1	0	0	1	1	0	1
Diabetology and Metabolic Syndrome		Diabetology &#x0026; Metabolic Syndrome	Diabetology & metabolic syndrome	Diabetology and Metabolic Syndrome	Diabetology & Metabolic Syndrome	DIABETOL METAB SYNDR	17585996	17585996	1	1	1	0	1	1	1	1	1	1.924
Diagnostic and Interventional Radiology	Diagnostic and interventional radiology (Ankara, Turkey)		Diagnostic and interventional radiology (Ankara, Turkey)	Diagnostic and Interventional Radiology	Diagnostic and Interventional Radiology	DIAGN INTERV RADIOL	13053825	13053612	1	1	1	1	0	1	1	1	1	1.031
Diagnostic and Therapeutic Endoscopy		Diagnostic and Therapeutic Endoscopy	Diagnostic and therapeutic endoscopy	Diagnostic and Therapeutic Endoscopy	Diagnostic and Therapeutic Endoscopy		10703608	10290516	1	1	1	0	1	1	1	0	1
Diagnostic Pathology	Diagnostic pathology	Diagnostic Pathology	Diagnostic pathology	Diagnostic pathology	Diagnostic Pathology	DIAGN PATHOL	17461596	17461596	1	1	1	1	1	1	1	1	1	1.85
Disease Markers	Disease markers	Disease Markers	Disease markers	Disease Markers	Disease Markers	DIS MARKERS	02780240	18758630	1	1	1	1	1	1	1	1	1	2.14
DMM Disease Models and Mechanisms	Disease models & mechanisms	Disease Models &#x0026; Mechanisms	Disease models & mechanisms	DMM Disease Models and Mechanisms	Disease Models & Mechanisms	DIS MODEL MECH	17548403	17548411	1	1	1	1	1	1	1	1	1	4.959
DNA Research	DNA research : an international journal for rapid publication of reports on genes and genomes	DNA Research: An International Journal for Rapid Publication of Reports on Genes and Genomes	DNA research : an international journal for rapid publication of reports on genes and genomes	DNA Research	DNA Research	DNA RES	13402838	17561663	1	1	1	1	1	1	1	1	1	4.425
Dong wu xue yan jiu = Zoological research / "Dong wu xue yan jiu" bian ji wei yuan hui bian ji	Dong wu xue yan jiu = Zoological research / "Dong wu xue yan jiu" bian ji wei yuan hui bian ji		Dong wu xue yan jiu = Zoological research / "Dong wu xue yan jiu" bian ji wei yuan hui bian ji	Dong wu xue yan jiu = Zoological research / "Dong wu xue yan jiu" bian ji wei yuan hui bian ji	Zoological Research		02545853		1	1	1	1	0	1	1	0	1
Drug metabolism and pharmacokinetics	Drug metabolism and pharmacokinetics		Drug metabolism and pharmacokinetics	Drug Metabolism and Pharmacokinetics	Drug Metabolism and Pharmacokinetics	DRUG METAB PHARMACOK	13474367	18800920	1	1	1	1	0	1	1	1	1	2.071
Drug Target Insights		Drug Target Insights	Drug target insights	Drug Target Insights	Drug Target Insights		11773928	11773928	1	1	1	0	1	1	1	0	1
Drugs in Context		Drugs in Context	Drugs in context	Drugs in Context	Drugs in Context		17451981	17404398	1	1	1	0	1	1	1	0	1
Drugs in R and D	Drugs in R&D		Drugs in R&D	Drugs in R and D	Drugs in R&D		11796901	11796901	1	1	1	1	0	1	1	0	1
Duke Law Journal	Duke law journal		Duke law journal	Duke law journal	Duke Law Journal	DUKE LAW J	00127086	00127086	1	1	1	1	0	1	1	1	1	2.356
Dusunen Adam				Dusunen Adam	DÃ¼Å?Ã¼nen Adam : Journal of Psychiatry and Neurological Sciences		10188681	13095749	1	1	1	0	0	0	1	0	1
Duzce Medical Journal				Duzce Medical Journal	Duzce Universitesi Tip FakÃ¼ltesi Dergisi		1307671X		1	1	1	0	0	0	1	0	1
Dynamis	Dynamis (Granada, Spain)		Dynamis (Granada, Spain)	Dynamis (Granada, Spain)	Dynamis : Acta Hispanica ad Medicinae Scientiarumque Historiam Illustrandam	DYNAMIS	02119536	23407948	1	1	1	1	0	1	1	1	1	0.125
ecancermedicalscience		ecancermedicalscience	Ecancermedicalscience	ecancermedicalscience	Ecancermedicalscience		17546605	17546605	1	1	1	0	1	1	1	0	1
Einstein (São Paulo, Brazil)	Einstein (São Paulo, Brazil)		Einstein (Sao Paulo, Brazil)	Einstein (São Paulo, Brazil)	Einstein		16794508	23176385	1	1	1	1	0	1	1	0	1
EJNMMI Research		EJNMMI Research	EJNMMI research	EJNMMI Research	EJNMMI Research		2191219X	2191219X	1	1	1	0	1	1	1	0	1
eLife		eLife	eLife	eLife	eLife		2050084X	2050084X	1	1	1	0	1	1	1	0	1
EMBO Molecular Medicine	EMBO molecular medicine	EMBO Molecular Medicine	EMBO molecular medicine	EMBO Molecular Medicine	EMBO Molecular Medicine	EMBO MOL MED	17574676	17574684	1	1	1	1	1	1	1	1	1	7.795
Emerging Health Threats Journal	Emerging health threats journal	Emerging Health Threats Journal	Emerging health threats journal	Emerging Health Threats Journal	Emerging Health Threats Journal		17528550	17528550	1	1	1	1	1	1	1	0	1
Emerging Infectious Diseases	Emerging infectious diseases	Emerging Infectious Diseases	Emerging infectious diseases	Emerging Infectious Diseases	Emerging Infectious Diseases	EMERG INFECT DIS	10806040	10806059	1	1	1	1	1	1	1	1	1	5.993
Emerging Microbes and Infections		Emerging Microbes &#x0026; Infections		Emerging Microbes and Infections	Emerging Microbes and Infections		22221751	22221751	1	1	1	0	1	0	1	0	1
Emerging Themes in Epidemiology		Emerging Themes in Epidemiology	Emerging themes in epidemiology	Emerging Themes in Epidemiology	Emerging Themes in Epidemiology		17427622	17427622	1	1	1	0	1	1	1	0	1
Endocrine Journal	Endocrine journal		Endocrine journal	Endocrine Journal	Endocrine Journal	ENDOCR J	09188959	13484540	1	1	1	1	0	1	1	1	1	2.228
Environmental Health Perspectives	Environmental health perspectives	Environmental Health Perspectives	Environmental health perspectives	Environmental Health Perspectives	Environmental Health Perspectives	ENVIRON HEALTH PERSP	00916765	15529924	1	1	1	1	1	1	1	1	1	7.26
Environmental Health: A Global Access Science Source	Environmental health : a global access science source	Environmental Health	Environmental health : a global access science source	Environmental Health: A Global Access Science Source	Environmental Health	ENVIRON HEALTH-GLOB	1476069X	1476069X	1	1	1	1	1	1	1	1	1	2.714
Enzyme Research		Enzyme Research	Enzyme research	Enzyme Research	Enzyme Research		20900406	20900414	1	1	1	0	1	1	1	0	1
Epigenetics and Chromatin		Epigenetics &#x0026; Chromatin	Epigenetics & chromatin	Epigenetics and Chromatin	Epigenetics & Chromatin	EPIGENET CHROMATIN	17568935	17568935	1	1	1	0	1	1	1	1	1	4.19
Epilepsy Currents		Epilepsy Currents	Epilepsy currents / American Epilepsy Society	Epilepsy Currents	Epilepsy Currents	EPILEPSY CURR	15357597	15357511	1	1	1	0	1	1	1	1	1	2.333
EPMA Journal		The EPMA Journal	The EPMA journal	EPMA Journal	EPMA Journal		18785085	18785085	1	1	1	0	1	1	1	0	1
Erciyes Tip Dergisi				Erciyes Tip Dergisi	Erciyes Medical Journal		1300199X		1	1	1	0	0	0	1	0	1
Eurasian Journal of Analytical Chemistry				Eurasian Journal of Analytical Chemistry	Eurasian Journal of Analytical Chemistry		13063057		1	1	1	0	0	0	1	0	1
Eurasip Journal on Bioinformatics and Systems Biology		EURASIP Journal on Bioinformatics and Systems Biology	EURASIP journal on bioinformatics & systems biology	Eurasip Journal on Bioinformatics and Systems Biology	EURASIP Journal on Bioinformatics and Systems Biology		16874145	16874153	1	1	1	0	1	1	1	0	1
European Cells and Materials	European cells & materials		European cells & materials	European Cells and Materials	European Cells and Materials (ECM)	EUR CELLS MATER	14732262	14732262	1	1	1	1	0	1	1	1	1	4.558
European Journal of Histochemistry	European journal of histochemistry : EJH	European Journal of Histochemistry : EJH	European journal of histochemistry : EJH	European journal of histochemistry : EJH	European Journal of Histochemistry	EUR J HISTOCHEM	1121760X	20388306	1	1	1	1	1	1	1	1	1	2.412
European Journal of Medical Research	European journal of medical research	European Journal of Medical Research	European journal of medical research	European Journal of Medical Research	European Journal of Medical Research	EUR J MED RES	2047783X	2047783X	1	1	1	1	1	1	1	1	1	1.098
European Journal of Mental Health				European Journal of Mental Health	European Journal of Mental Health		17884934	17887119	1	1	1	0	0	0	1	0	1
European Journal of Oncology Pharmacy				European Journal of Oncology Pharmacy	European Journal of Oncology Pharmacy		17833914	20327072	1	1	1	0	0	0	1	0	1
European Journal of Psychiatry				European Journal of Psychiatry	The European Journal of Psychiatry	EUR J PSYCHIAT	02136163	02136163	1	1	1	0	0	0	1	1	1	0.318
European Respiratory Review	European respiratory review : an official journal of the European Respiratory Society		European respiratory review : an official journal of the European Respiratory Society	European Respiratory Review	European Respiratory Review		09059180	16000617	1	1	1	1	0	1	1	0	1
Eurosurveillance	Euro surveillance : bulletin Européen sur les maladies transmissibles = European communicable disease bulletin		Euro surveillance : bulletin Europeen sur les maladies transmissibles = European communicable disease bulletin	Eurosurveillance	Eurosurveillance	EUROSURVEILLANCE	15607917	15607917	1	1	1	1	0	1	1	1	1	5.491
Evidence-based Complementary and Alternative Medicine		Evidence-based Complementary and Alternative Medicine : eCAM	Evidence-based complementary and alternative medicine : eCAM	Evidence-based Complementary and Alternative Medicine	Evidence-Based Complementary and Alternative Medicine	EVID-BASED COMPL ALT	1741427X	17414288	1	1	1	0	1	1	1	1	1	1.722
Evolutionary Bioinformatics		Evolutionary Bioinformatics Online	Evolutionary bioinformatics online	Evolutionary Bioinformatics	Evolutionary Bioinformatics	EVOL BIOINFORM	11769343	11769343	1	1	1	0	1	1	1	1	1	1.326
Evolutionary Psychology	Evolutionary psychology : an international journal of evolutionary approaches to psychology and behavior		Evolutionary psychology : an international journal of evolutionary approaches to psychology and behavior	Evolutionary psychology : an international journal of evolutionary approaches to psychology and behavior	Evolutionary Psychology: an International Journal of Evolutionary Approaches to Psychology and Behavior	EVOL PSYCHOL-US	14747049	14747049	1	1	1	1	0	1	1	1	1	1.704
EXCLI Journal				EXCLI Journal	EXCLI Journal	EXCLI J	16112156	16112156	1	1	1	0	0	0	1	1	1	1.923
Experimental and Molecular Medicine	Experimental & molecular medicine	Experimental &#x0026; Molecular Medicine	Experimental & molecular medicine	Experimental and Molecular Medicine	Experimental and Molecular Medicine EMM	EXP MOL MED	12263613	20926413	1	1	1	1	1	1	1	1	1	2.573
Experimental and Translational Stroke Medicine		Experimental &#x0026; Translational Stroke Medicine	Experimental & translational stroke medicine	Experimental and Translational Stroke Medicine	Experimental & Translational Stroke Medicine		20407378	20407378	1	1	1	0	1	1	1	0	1
F1000 Research		F1000Research	F1000Research	F1000Research	F1000Research		20461402	20461402	1	1	1	0	1	1	1	0	1
FEBS Open Bio		FEBS Open Bio	FEBS open bio	FEBS Open Bio	FEBS Open Bio		22115463	22115463	1	1	1	0	1	1	1	0	1
Fibrogenesis and Tissue Repair		Fibrogenesis &#x0026; Tissue Repair	Fibrogenesis & tissue repair	Fibrogenesis and Tissue Repair	Fibrogenesis & Tissue Repair		17551536	17551536	1	1	1	0	1	1	1	0	1
Fluids and Barriers of the CNS		Fluids and Barriers of the CNS	Fluids and barriers of the CNS	Fluids and Barriers of the CNS	Fluids and Barriers of the CNS		20458118	20458118	1	1	1	0	1	1	1	0	1
Fluoride - Quarterly Reports				Fluoride	Fluoride	FLUORIDE	00154725	22534083	1	1	1	0	0	0	1	1	1	0.758
Folia Histochemica et Cytobiologica	Folia histochemica et cytobiologica / Polish Academy of Sciences, Polish Histochemical and Cytochemical Society		Folia histochemica et cytobiologica / Polish Academy of Sciences, Polish Histochemical and Cytochemical Society	Folia Histochemica et Cytobiologica	Folia Histochemica et Cytobiologica	FOLIA HISTOCHEM CYTO	02398508	18975631	1	1	1	1	0	1	1	1	1	1.101
Folia Medica	Folia medica		Folia medica	Folia medica	Folia Medica		02048043	13142143	1	1	1	1	0	1	1	0	1
Folia Neuropathologica	Folia neuropathologica / Association of Polish Neuropathologists and Medical Research Centre, Polish Academy of Sciences		Folia neuropathologica / Association of Polish Neuropathologists and Medical Research Centre, Polish Academy of Sciences	Folia Neuropathologica	Folia Neuropathologica	FOLIA NEUROPATHOL	16414640	1509572X	1	1	1	1	0	1	1	1	1	1.547
Food and Nutrition Research		Food &#x0026; Nutrition Research	Food & nutrition research	Food and Nutrition Research	Food & Nutrition Research		16546628	1654661X	1	1	1	0	1	1	1	0	1
Forum of Clinical Oncology			Forum of clinical oncology	Forum of Clinical Oncology	Forum of Clinical Oncology : Quarterly Official Publication of the Hellenic Society of Medical Oncology		1792345X	1792362X	1	1	1	0	0	1	1	0	1
Frontiers in Aging Neuroscience		Frontiers in Aging Neuroscience	Frontiers in aging neuroscience	Frontiers in Aging Neuroscience	Frontiers in Aging Neuroscience	FRONT AGING NEUROSCI	16634365	16634365	1	1	1	0	1	1	1	1	1	5.224
Frontiers in Behavioral Neuroscience		Frontiers in Behavioral Neuroscience	Frontiers in behavioral neuroscience	Frontiers in Behavioral Neuroscience	Frontiers in Behavioral Neuroscience	FRONT BEHAV NEUROSCI	16625153	16625153	1	1	1	0	1	1	1	1	1	4.758
Frontiers in Cellular Neuroscience		Frontiers in Cellular Neuroscience	Frontiers in cellular neuroscience	Frontiers in Cellular Neuroscience	Frontiers in Cellular Neuroscience	FRONT CELL NEUROSCI	16625102	16625102	1	1	1	0	1	1	1	1	1	4.469
Frontiers in Computational Neuroscience		Frontiers in Computational Neuroscience	Frontiers in computational neuroscience	Frontiers in Computational Neuroscience	Frontiers in Computational Neuroscience	FRONT COMPUT NEUROSC	16625188	16625188	1	1	1	0	1	1	1	1	1	2.481
Frontiers in Genetics		Frontiers in Genetics	Frontiers in genetics	Frontiers in Genetics	Frontiers in Genetics		16648021	16648021	1	1	1	0	1	1	1	0	1
Frontiers in Human Neuroscience		Frontiers in Human Neuroscience	Frontiers in human neuroscience	Frontiers in Human Neuroscience	Frontiers in Human Neuroscience	FRONT HUM NEUROSCI	16625161	16625161	1	1	1	0	1	1	1	1	1	2.906
Frontiers in Integrative Neuroscience		Frontiers in Integrative Neuroscience	Frontiers in integrative neuroscience	Frontiers in Integrative Neuroscience	Frontiers in Integrative Neuroscience		16625145	16625145	1	1	1	0	1	1	1	0	1
Frontiers in Microbiology		Frontiers in Microbiology	Frontiers in microbiology	Frontiers in Microbiology	Frontiers in Microbiology		1664302X	1664302X	1	1	1	0	1	1	1	0	1
Frontiers in Molecular Neuroscience		Frontiers in Molecular Neuroscience	Frontiers in molecular neuroscience	Frontiers in Molecular Neuroscience	Frontiers in Molecular Neuroscience		16625099	16625099	1	1	1	0	1	1	1	0	1
Frontiers in Neural Circuits	Frontiers in neural circuits	Frontiers in Neural Circuits	Frontiers in neural circuits	Frontiers in Neural Circuits	Frontiers in Neural Circuits	FRONT NEURAL CIRCUIT	16625110	16625110	1	1	1	1	1	1	1	1	1	3.333
Frontiers in Neuroanatomy		Frontiers in Neuroanatomy	Frontiers in neuroanatomy	Frontiers in Neuroanatomy	Frontiers in Neuroanatomy	FRONT NEUROANAT	16625129	16625129	1	1	1	0	1	1	1	1	1	4.058
Frontiers in Neuroenergetics		Frontiers in Neuroenergetics	Frontiers in neuroenergetics	Frontiers in Neuroenergetics	Frontiers in Neuroenergetics		16626427	16626427	1	1	1	0	1	1	1	0	1
Frontiers in Neuroengineering		Frontiers in Neuroengineering	Frontiers in neuroengineering	Frontiers in Neuroengineering	Frontiers in Neuroengineering		16626443	16626443	1	1	1	0	1	1	1	0	1
Frontiers in Neuroinformatics		Frontiers in Neuroinformatics	Frontiers in neuroinformatics	Frontiers in Neuroinformatics	Frontiers in Neuroinformatics		16625196	16625196	1	1	1	0	1	1	1	0	1
Frontiers in Neurology		Frontiers in Neurology	Frontiers in neurology	Frontiers in Neurology	Frontiers in Neurology		16642295	16642295	1	1	1	0	1	1	1	0	1
Frontiers in Neurorobotics		Frontiers in Neurorobotics	Frontiers in neurorobotics	Frontiers in Neurorobotics	Frontiers in Neurorobotics		16625218	16625218	1	1	1	0	1	1	1	0	1
Frontiers in Neuroscience		Frontiers in Neuroscience	Frontiers in neuroscience	Frontiers in Neuroscience	Frontiers in Neuroscience		16624548	1662453X	1	1	1	0	1	1	1	0	1
Frontiers in Pharmacology		Frontiers in Pharmacology	Frontiers in pharmacology	Frontiers in Pharmacology	Frontiers in Pharmacology		16639812	16639812	1	1	1	0	1	1	1	0	1
Frontiers in Physiology		Frontiers in Physiology	Frontiers in physiology	Frontiers in Physiology	Frontiers in Physiology		1664042X	1664042X	1	1	1	0	1	1	1	0	1
Frontiers in Psychiatry		Frontiers in Psychiatry	Frontiers in psychiatry	Frontiers in Psychiatry	Frontiers in Psychiatry		16640640	16640640	1	1	1	0	1	1	1	0	1
Frontiers in Synaptic Neuroscience		Frontiers in Synaptic Neuroscience	Frontiers in synaptic neuroscience	Frontiers in Synaptic Neuroscience	Frontiers in Synaptic Neuroscience		16633563	16633563	1	1	1	0	1	1	1	0	1
Frontiers in Systems Neuroscience		Frontiers in Systems Neuroscience	Frontiers in systems neuroscience	Frontiers in Systems Neuroscience	Frontiers in Systems Neuroscience		16625137	16625137	1	1	1	0	1	1	1	0	1
Functional Neurology	Functional neurology	Functional Neurology	Functional neurology	Functional Neurology	Functional Neurology	FUNCT NEUROL	03935264	19713274	1	1	1	1	1	1	1	1	1	1.037
G3 (Bethesda, Md.)	G3 (Bethesda, Md.)	G3: Genes|Genomes|Genetics	G3 (Bethesda, Md.)	G3: Genes, Genomes, Genetics	G3 : Genes, Genomes, Genetics	G3-GENES GENOM GENET	21601836	21601836	1	1	1	1	1	1	1	1	1	1.794
Gaceta Sanitaria	Gaceta sanitaria / S.E.S.P.A.S		Gaceta sanitaria / S.E.S.P.A.S	Gaceta sanitaria / S.E.S.P.A.S	Gaceta Sanitaria	GAC SANIT	02139111	15781283	1	1	1	1	0	1	1	1	1	1.116
Gastroenterology Insights				Gastroenterology Insights	Gastroenterology Insights		20367414	20367422	1	1	1	0	0	0	1	0	1
Gastroenterology Research and Practice		Gastroenterology Research and Practice	Gastroenterology research and practice	Gastroenterology Research and Practice	Gastroenterology Research and Practice	GASTROENT RES PRACT	16876121	1687630X	1	1	1	0	1	1	1	1	1	1.615
Gene Regulation and Systems Biology		Gene Regulation and Systems Biology	Gene regulation and systems biology	Gene Regulation and Systems Biology	Gene Regulation and Systems Biology		11776250	11776250	1	1	1	0	1	1	1	0	1
Genes		Genes	Genes	Genes	Genes		20734425	20734425	1	1	1	0	1	1	1	0	1
Genes and Genetic Systems	Genes & genetic systems		Genes & genetic systems	Genes and Genetic Systems	Genes & Genetic Systems	GENES GENET SYST	13417568	18805779	1	1	1	1	0	1	1	1	1	1.132
Genetics and Molecular Biology		Genetics and Molecular Biology	Genetics and molecular biology	Genetics and Molecular Biology	Genetics and Molecular Biology	GENET MOL BIOL	14154757	16784685	1	1	1	0	1	1	1	1	1	0.744
Genome Biology and Evolution	Genome biology and evolution	Genome Biology and Evolution	Genome biology and evolution	Genome biology and evolution	Genome Biology and Evolution	GENOME BIOL EVOL	17596653	17596653	1	1	1	1	1	1	1	1	1	4.759
Genome Integrity		Genome Integrity	Genome integrity	Genome Integrity	Genome Integrity		20419414	20419414	1	1	1	0	1	1	1	0	1
German Journal of Psychiatry				German Journal of Psychiatry	German Journal of Psychiatry		14331055	14331055	1	1	1	0	0	0	1	0	1
German medical science : GMS e-journal	German medical science : GMS e-journal	GMS German Medical Science	German medical science : GMS e-journal	German medical science : GMS e-journal	GMS German Medical Science		16123174	16123174	1	1	1	1	1	1	1	0	1
Global Health Action	Global health action	Global Health Action	Global health action	Global health action	Global Health Action	GLOBAL HEALTH ACTION	16549880	16549880	1	1	1	1	1	1	1	1	1	2.062
GMS Zeitschrift für medizinische Ausbildung	GMS Zeitschrift für medizinische Ausbildung	GMS Zeitschrift f&#x000fc;r Medizinische Ausbildung	GMS Zeitschrift fur medizinische Ausbildung	GMS Zeitschrift für medizinische Ausbildung	GMS Zeitschrift fÃ¼r Medizinische Ausbildung		18607446	18603572	1	1	1	1	1	1	1	0	1
Guncel Pediatri				Guncel Pediatri	GÃ¼ncel Pediatri		13049054	13086308	1	1	1	0	0	0	1	0	0
Haematologica	Haematologica	Haematologica	Haematologica	Haematologica	Haematologica	HAEMATOL-HEMATOL J	03906078	15928721	1	1	1	1	1	1	1	1	1	5.935
Head and Face Medicine	Head & face medicine	Head &#x0026; Face Medicine	Head & face medicine	Head & face medicine	Head & Face Medicine	HEAD FACE MED	1746160X	1746160X	1	1	1	1	1	1	1	1	1	0.981
Health and Human Rights	Health and human rights		Health and human rights	Health and human rights	Health and Human Rights		10790969	21504113	1	1	1	1	0	1	1	0	1
Health and Quality of Life Outcomes	Health and quality of life outcomes	Health and Quality of Life Outcomes	Health and quality of life outcomes	Health and Quality of Life Outcomes	Health and Quality of Life Outcomes	HEALTH QUAL LIFE OUT	14777525	14777525	1	1	1	1	1	1	1	1	1	2.272
Health reports / Statistics Canada, Canadian Centre for Health Information = Rapports sur la sante / Statistique Canada, Centre canadien d'information sur la sante	Health reports		Health reports	Health reports	Health Reports	HEALTH REP	08406529	12091367	1	1	1	1	0	1	1	1	1	4.283
Health Research Policy and Systems	Health research policy and systems / BioMed Central	Health Research Policy and Systems	Health research policy and systems / BioMed Central	Health Research Policy and Systems	Health Research Policy and Systems	HEALTH RES POLICY SY	14784505	14784505	1	1	1	1	1	1	1	1	1	1.409
Heart International		Heart International	Heart international	Heart International	Heart International		18261868	20362579	1	1	1	0	1	1	1	0	1
Hellenic journal of cardiology : HJC = Hellenike kardiologike epitheorese	Hellenic journal of cardiology : HJC = Hell?nik? kardiologik? epithe?r?s?		Hellenic journal of cardiology : HJC = Hellenike kardiologike epitheorese	Hellenic Journal of Cardiology	Hellenic Journal of Cardiology	HELL J CARDIOL	11099666	22415955	1	1	1	1	0	1	1	1	1	1.227
Hematology / the Education Program of the American Society of Hematology. American Society of Hematology. Education Program	Hematology / the Education Program of the American Society of Hematology. American Society of Hematology. Education Program		Hematology / the Education Program of the American Society of Hematology. American Society of Hematology. Education Program	Hematology / the Education Program of the American Society of Hematology. American Society of Hematology. Education Program	Hematology online (ASH)		15204391	15204383	1	1	1	1	0	1	1	0	1
Hematology Reports		Hematology Reports	Hematology reports	Hematology Reports	Hematology Reports		20388322	20388330	1	1	1	0	1	1	1	0	1
Hepatitis Monthly		Hepatitis Monthly	Hepatitis monthly	Hepatitis Monthly	Hepatitis Monthly	HEPAT MON	1735143X	17453408	1	1	1	0	1	1	1	1	1	1.245
Hereditary Cancer in Clinical Practice		Hereditary Cancer in Clinical Practice	Hereditary cancer in clinical practice	Hereditary Cancer in Clinical Practice	Hereditary Cancer in Clinical Practice	HERED CANCER CLIN PR	18974287	18974287	1	1	1	0	1	1	1	1	1	1.714
Hereditas	Hereditas		Hereditas	Hereditas	Hereditas	HEREDITAS	00180661	16015223	1	1	1	1	0	1	1	1	1	0.964
Historia, Ciencias, Saude - Manguinhos	História, ciências, saúde--Manguinhos		Historia, ciencias, saude--Manguinhos	História, ciências, saúde--Manguinhos	HistÃ³ria, CiÃªncias, SaÃºde-Manguinhos		01045970	16784758	1	1	1	1	0	1	1	0	1
HIV/AIDS - Research and Palliative Care		HIV/AIDS (Auckland, N.Z.)	HIV/AIDS (Auckland, N.Z.)	HIV/AIDS - Research and Palliative Care	HIV/AIDS : Research and Palliative Care		11791373	11791373	1	1	1	0	1	1	1	0	1
Hong Kong Journal of Emergency Medicine				Hong Kong Journal of Emergency Medicine	Hong Kong Journal of Emergency Medicine	HONG KONG J EMERG ME	10249079	10249079	1	1	1	0	0	0	1	1	1	0.132
Hong Kong Journal of Paediatrics				Hong Kong Journal of Paediatrics	Hong Kong Journal of Paediatrics	HONG KONG J PAEDIATR	10139923	10139923	1	1	1	0	0	0	1	1	1	0.068
Hong Kong Medical Journal	Hong Kong medical journal = Xianggang yi xue za zhi / Hong Kong Academy of Medicine		Hong Kong medical journal = Xianggang yi xue za zhi / Hong Kong Academy of Medicine	Hong Kong Medical Journal	Hong Kong Medical Journal		10242708	22268707	1	1	1	1	0	1	1	0	1
Human Genomics	Human genomics	Human Genomics	Human genomics	Human Genomics	Human Genomics		14797364	14797364	1	1	1	1	1	1	1	0	1
Human Resources for Health	Human resources for health	Human Resources for Health	Human resources for health	Human resources for health	Human Resources for Health	HUM RESOUR HEALTH	14784491	14784491	1	1	1	1	1	1	1	1	1	2.051
Iatreia				Iatreia	Iatreia		01210793	20117965	1	1	1	0	0	0	1	0	0
IIOAB Journal				IIOAB Journal	The IIOAB Journal		09763104		1	1	1	0	0	0	1	0	1
Immunity and Ageing		Immunity &#x0026; Ageing : I &#x0026; A	Immunity & ageing : I & A	Immunity and Ageing	Immunity & Ageing		17424933	17424933	1	1	1	0	1	1	1	0	1
Implementation Science	Implementation science : IS	Implementation Science : IS	Implementation science : IS	Implementation science : IS	Implementation Science	IMPLEMENT SCI	17485908	17485908	1	1	1	1	1	1	1	1	1	2.372
Indian Journal of Anaesthesia		Indian Journal of Anaesthesia	Indian journal of anaesthesia	Indian Journal of Anaesthesia	Indian Journal of Anaesthesia		00195049	09762817	1	1	1	0	1	1	1	0	1
Indian Journal of Biochemistry and Biophysics	Indian journal of biochemistry & biophysics		Indian journal of biochemistry & biophysics	Indian journal of biochemistry & biophysics	Indian Journal of Biochemistry & Biophysics	INDIAN J BIOCHEM BIO	03011208	09750959	1	1	1	1	0	1	1	1	1	1.026
Indian Journal of Biotechnology				Indian Journal of Biotechnology	Indian Journal of Biotechnology	INDIAN J BIOTECHNOL	09725849	09750967	1	1	1	0	0	0	1	1	1	0.477
Indian Journal of Cancer	Indian journal of cancer		Indian journal of cancer	Indian Journal of Cancer	Indian Journal of Cancer	INDIAN J CANCER	0019509X	19984774	1	1	1	1	0	1	1	1	1	1.131
Indian Journal of Critical Care Medicine		Indian Journal of Critical Care Medicine : Peer-reviewed, Official Publication of Indian Society of Critical Care Medicine	Indian journal of critical care medicine : peer-reviewed, official publication of Indian Society of Critical Care Medicine	Indian Journal of Critical Care Medicine	Indian Journal of Critical Care Medicine		09725229	1998359X	1	1	1	0	1	1	1	0	1
Indian Journal of Dental Research	Indian journal of dental research : official publication of Indian Society for Dental Research		Indian journal of dental research : official publication of Indian Society for Dental Research	Indian journal of dental research : official publication of Indian Society for Dental Research	Indian Journal of Dental Research		09709290	19983603	1	1	1	1	0	1	1	0	1
Indian Journal of Dermatology		Indian Journal of Dermatology	Indian journal of dermatology	Indian Journal of Dermatology	Indian Journal of Dermatology		00195154	19983611	1	1	1	0	1	1	1	0	1
Indian Journal of Dermatology, Venereology and Leprology	Indian journal of dermatology, venereology and leprology		Indian journal of dermatology, venereology and leprology	Indian Journal of Dermatology, Venereology and Leprology	Indian Journal of Dermatology, Venereology and Leprology	INDIAN J DERMATOL VE	03786323	09733922	1	1	1	1	0	1	1	1	1	1.206
Indian Journal of Experimental Biology	Indian journal of experimental biology		Indian journal of experimental biology	Indian journal of experimental biology	Indian Journal of Experimental Biology	INDIAN J EXP BIOL	00195189	09751009	1	1	1	1	0	1	1	1	1	1.195
Indian Journal of Human Genetics		Indian Journal of Human Genetics	Indian journal of human genetics	Indian Journal of Human Genetics	Indian Journal of Human Genetics		09716866	1998362X	1	1	1	0	1	1	1	0	1
Indian Journal of Medical and Paediatric Oncology		Indian Journal of Medical and Paediatric Oncology : Official Journal of Indian Society of Medical &#x0026; Paediatric Oncology	Indian journal of medical and paediatric oncology : official journal of Indian Society of Medical & Paediatric Oncology	Indian Journal of Medical and Paediatric Oncology	Indian Journal of Medical and Paediatric Oncology		09715851	09752129	1	1	1	0	1	1	1	0	1
Indian Journal of Medical Microbiology	Indian journal of medical microbiology		Indian journal of medical microbiology	Indian Journal of Medical Microbiology	Indian Journal of Medical Microbiology	INDIAN J MED MICROBI	02550857	19983646	1	1	1	1	0	1	1	1	1	0.907
Indian Journal of Medical Research	The Indian journal of medical research	The Indian Journal of Medical Research	The Indian journal of medical research	Indian Journal of Medical Research	Indian Journal of Medical Research	INDIAN J MED RES	09715916	09715916	1	1	1	1	1	1	1	1	1	2.061
Indian Journal of Medical Sciences	Indian journal of medical sciences		Indian journal of medical sciences	Indian Journal of Medical Sciences	Indian Journal of Medical Sciences		00195359	19983654	1	1	1	1	0	1	1	0	1
Indian Journal of Occupational and Environmental Medicine		Indian Journal of Occupational and Environmental Medicine	Indian journal of occupational and environmental medicine	Indian Journal of Occupational and Environmental Medicine	Indian Journal of Occupational and Environmental Medicine		09732284	19983670	1	1	1	0	1	1	1	0	1
Indian Journal of Ophthalmology	Indian journal of ophthalmology	Indian Journal of Ophthalmology	Indian journal of ophthalmology	Indian journal of ophthalmology	Indian Journal of Ophthalmology	INDIAN J OPHTHALMOL	03014738	19983689	1	1	1	1	1	1	1	1	1	0.797
Indian Journal of Otology				Indian Journal of Otology	Indian Journal of Otology		09717749	22499520	1	1	1	0	0	0	1	0	1
Indian Journal of Pathology and Microbiology	Indian journal of pathology & microbiology		Indian journal of pathology & microbiology	Indian Journal of Pathology and Microbiology	Indian Journal of Pathology and Microbiology	INDIAN J PATHOL MICR	03774929	09745130	1	1	1	1	0	1	1	1	1	0.676
Indian Journal of Pharmaceutical Sciences		Indian Journal of Pharmaceutical Sciences	Indian journal of pharmaceutical sciences	Indian Journal of Pharmaceutical Sciences	Indian Journal of Pharmaceutical Sciences	INDIAN J PHARM SCI	0250474X	19983743	1	1	1	0	1	1	1	1	1	0.338
Indian Journal of Pharmacology	Indian journal of pharmacology	Indian Journal of Pharmacology	Indian journal of pharmacology	Indian Journal of Pharmacology	Indian Journal of Pharmacology	INDIAN J PHARMACOL	02537613	19983751	1	1	1	1	1	1	1	1	1	0.583
Indian journal of public health	Indian journal of public health		Indian journal of public health	Indian journal of public health	Indian Journal of Public Health		0019557X	22297693	1	1	1	1	0	1	1	0	1
Indian Journal of Radiology and Imaging		The Indian Journal of Radiology &#x0026; Imaging	The Indian journal of radiology & imaging	Indian Journal of Radiology and Imaging	Indian Journal of Radiology and Imaging		09713026	19983808	1	1	1	0	1	1	1	0	1
Indian Pacing and Electrophysiology Journal		Indian Pacing and Electrophysiology Journal	Indian pacing and electrophysiology journal	Indian Pacing and Electrophysiology Journal	Indian Pacing and Electrophysiology Journal		09726292	09726292	1	1	1	0	1	1	1	0	1
Indian Pediatrics	Indian pediatrics		Indian pediatrics	Indian Pediatrics	Indian Pediatrics	INDIAN PEDIATR	00196061	09747559	1	1	1	1	0	1	1	1	1	1.036
Industrial Health	Industrial health		Industrial health	Industrial health	Industrial Health	IND HEALTH	00198366	18808026	1	1	1	1	0	1	1	1	1	0.87
Infection and Drug Resistance		Infection and Drug Resistance	Infection and drug resistance	Infection and Drug Resistance	Infection and Drug Resistance		11786973	11786973	1	1	1	0	1	1	1	0	1
Infectious Agents and Cancer		Infectious Agents and Cancer	Infectious agents and cancer	Infectious Agents and Cancer	Infectious Agents and Cancer		17509378	17509378	1	1	1	0	1	1	1	0	1
Infectious Disease Reports		Infectious Disease Reports	Infectious disease reports	Infectious Disease Reports	Infectious Disease Reports		20367430	20367449	1	1	1	0	1	1	1	0	1
Infectious Diseases in Obstetrics and Gynecology	Infectious diseases in obstetrics and gynecology	Infectious Diseases in Obstetrics and Gynecology	Infectious diseases in obstetrics and gynecology	Infectious Diseases in Obstetrics and Gynecology	Infectious Diseases in Obstetrics & Gynecology		10647449	10980997	1	1	1	1	1	1	1	0	1
Integrative Medicine Insights		Integrative Medicine Insights	Integrative medicine insights	Integrative Medicine Insights	Integrative Medicine Insights		11773936	11773936	1	1	1	0	1	1	1	0	1
Interactive Cardiovascular and Thoracic Surgery	Interactive cardiovascular and thoracic surgery	Interactive Cardiovascular and Thoracic Surgery	Interactive cardiovascular and thoracic surgery	Interactive Cardiovascular and Thoracic Surgery	Interactive Cardiovascular and Thoracic Surgery	INTERACT CARDIOV TH	15699293	15699285	1	1	1	1	1	1	1	1	1	1.112
Interdisciplinary Perspectives on Infectious Diseases		Interdisciplinary Perspectives on Infectious Diseases	Interdisciplinary perspectives on infectious diseases	Interdisciplinary Perspectives on Infectious Diseases	Interdisciplinary Perspectives on Infectious Diseases		1687708X	16877098	1	1	1	0	1	1	1	0	1
Interdisciplinary Toxicology		Interdisciplinary Toxicology	Interdisciplinary toxicology	Interdisciplinary Toxicology	Interdisciplinary Toxicology		13376853	13379569	1	1	1	0	1	1	1	0	1
Internal Medicine	Internal medicine (Tokyo, Japan)		Internal medicine (Tokyo, Japan)	Internal Medicine	Internal Medicine	INTERNAL MED	09182918	13497235	1	1	1	1	0	1	1	1	1	0.973
International Archives of Medicine		International Archives of Medicine	International archives of medicine	International Archives of Medicine	International Archives of Medicine		17557682	17557682	1	1	1	0	1	1	1	0	1
International Archives of Otorhinolaryngology				International Archives of Otorhinolaryngology	International Archives of Otorhinolaryngology		18099777	18094864	1	1	1	0	0	0	1	0	1
International Braz J Urol: official journal of the Brazilian Society of Urology	International braz j urol : official journal of the Brazilian Society of Urology		International braz j urol : official journal of the Brazilian Society of Urology	International braz j urol : official journal of the Brazilian Society of Urology	International Brazilian Journal of Urology	INT BRAZ J UROL	16775538	16776119	1	1	1	1	0	1	1	1	1	0.742
International Cardiovascular Research Journal		International Cardiovascular Research Journal	International cardiovascular research journal	International Cardiovascular Research Journal	International Cardiovascular Research Journal		22519130	22519149	1	1	1	0	1	1	1	0	1
International Journal of Ophthalmology				International Eye Science	Guoji Yanke Zazhi		16725123		1	1	1	0	0	0	1	0	1
International Journal for Equity in Health	International journal for equity in health	International Journal for Equity in Health	International journal for equity in health	International Journal for Equity in Health	International Journal for Equity in Health	INT J EQUITY HEALTH	14759276	14759276	1	1	1	1	1	1	1	1	1	1.839
International Journal of Alzheimer's Disease		International Journal of Alzheimer's Disease	International journal of Alzheimer's disease	International Journal of Alzheimer's Disease	International Journal of Alzheimer's Disease		20908024	20900252	1	1	1	0	1	1	1	0	1
International Journal of Applied Research in Natural Products				International Journal of Applied Research in Natural Products	International Journal of Applied Research in Natural Products		19406223	19406223	1	1	1	0	0	0	1	0	1
International Journal of Behavioral Nutrition and Physical Activity	The international journal of behavioral nutrition and physical activity	The International Journal of Behavioral Nutrition and Physical Activity	The international journal of behavioral nutrition and physical activity	International Journal of Behavioral Nutrition and Physical Activity	International Journal of Behavioral Nutrition and Physical Activity	INT J BEHAV NUTR PHY	14795868	14795868	1	1	1	1	1	1	1	1	1	3.577
International Journal of Biochemistry and Molecular Biology		International Journal of Biochemistry and Molecular Biology	International journal of biochemistry and molecular biology	International Journal of Biochemistry and Molecular Biology	International Journal of Biochemistry and Molecular Biology		21524114	21524114	1	1	1	0	1	1	1	0	1
International Journal of Biological Sciences	International journal of biological sciences	International Journal of Biological Sciences	International journal of biological sciences	International journal of biological sciences	International Journal of Biological Sciences	INT J BIOL SCI	14492288	14492288	1	1	1	1	1	1	1	1	1	3.168
International Journal of Biomaterials		International Journal of Biomaterials	International journal of biomaterials	International Journal of Biomaterials	International Journal of Biomaterials		16878787	16878795	1	1	1	0	1	1	1	0	1
International Journal of Biomedical Imaging		International Journal of Biomedical Imaging	International journal of biomedical imaging	International Journal of Biomedical Imaging	International Journal of Biomedical Imaging		16874188	16874196	1	1	1	0	1	1	1	0	1
International Journal of Cell Biology		International Journal of Cell Biology	International journal of cell biology	International Journal of Cell Biology	International Journal of Cell Biology		16878876	16878884	1	1	1	0	1	1	1	0	1
International Journal of ChemTech Research				International Journal of ChemTech Research	International Journal of ChemTech Research		09744290		1	1	1	0	0	0	1	0	1
International journal of circumpolar health	International journal of circumpolar health	International Journal of Circumpolar Health	International journal of circumpolar health	International journal of circumpolar health	International Journal of Circumpolar Health	INT J CIRCUMPOL HEAL	12399736	22423982	1	1	1	1	1	1	1	1	1	1.303
International Journal of Clinical and Experimental Medicine		International Journal of Clinical and Experimental Medicine	International journal of clinical and experimental medicine	International Journal of Clinical and Experimental Medicine	International Journal of Clinical and Experimental Medicine		19405901	19405901	1	1	1	0	1	1	1	0	1
International Journal of Clinical and Experimental Pathology	International journal of clinical and experimental pathology	International Journal of Clinical and Experimental Pathology	International journal of clinical and experimental pathology	International journal of clinical and experimental pathology	International Journal of Clinical and Experimental Pathology	INT J CLIN EXP PATHO	19362625	19362625	1	1	1	1	1	1	1	1	1	2.242
International Journal of COPD	International journal of chronic obstructive pulmonary disease	International Journal of Chronic Obstructive Pulmonary Disease	International journal of chronic obstructive pulmonary disease	International Journal of COPD	International Journal of COPD		11769106	11782005	1	1	1	1	1	1	1	0	1
International Journal of Drug Delivery				International Journal of Drug Delivery (Bhopal)	International Journal of Drug Delivery		09750215	09750215	1	1	1	0	0	0	1	0	1
International Journal of Drug Development and Research				International Journal of Drug Development and Research	International Journal of Drug Development & Research		09759344	09759344	1	1	1	0	0	0	1	0	1
International Journal of Emergency Medicine		International Journal of Emergency Medicine	International journal of emergency medicine	International Journal of Emergency Medicine	International Journal of Emergency Medicine		18651372	18651380	1	1	1	0	1	1	1	0	1
International Journal of Endocrinology		International Journal of Endocrinology	International journal of endocrinology	International Journal of Endocrinology	International Journal of Endocrinology	INT J ENDOCRINOL	16878337	16878345	1	1	1	0	1	1	1	1	1	2.518
International Journal of Endocrinology and Metabolism		International Journal of Endocrinology and Metabolism	International journal of endocrinology and metabolism	International Journal of Endocrinology and Metabolism	International Journal of Endocrinology and Metabolism		1726913X	17269148	1	1	1	0	1	1	1	0	1
International Journal of Environmental Research and Public Health	International journal of environmental research and public health	International Journal of Environmental Research and Public Health	International journal of environmental research and public health	International Journal of Environmental Research and Public Health	International Journal of Environmental Research and Public Health	INT J ENV RES PUB HE	16617827	16604601	1	1	1	1	1	1	1	1	1	1.998
International Journal of Fertility and Sterility		International Journal of Fertility &#x0026; Sterility	International journal of fertility & sterility	International Journal of Fertility and Sterility	International Journal of Fertility & Sterility	INT J FERTIL STERIL	2008076X	20080778	1	1	1	0	1	1	1	1	1	0.471
International Journal of Genomics		International Journal of Genomics	International journal of genomics	International Journal of Genomics	International Journal of Genomics		2314436X	23144378	1	1	1	0	1	1	1	0	1
International Journal of Green Pharmacy				International Journal of Green Pharmacy	International Journal of Green Pharmacy		09738258	19984103	1	1	1	0	0	0	1	0	1
International Journal of Health Geographics	International journal of health geographics	International Journal of Health Geographics	International journal of health geographics	International journal of health geographics	International Journal of Health Geographics	INT J HEALTH GEOGR	1476072X	1476072X	1	1	1	1	1	1	1	1	1	2.195
International Journal of Health Research				International Journal of Health Research	International Journal of Health Research		15969886	15969819	1	1	1	0	0	0	1	0	1
International Journal of Hematology-Oncology and Stem Cell Research		International Journal of Hematology-Oncology and Stem Cell Research	International journal of hematology-oncology and stem cell research	International Journal of Hematology-Oncology and Stem Cell Research	International Journal of Hematology-Oncology and Stem Cell Research		20083009	20082207	1	1	1	0	1	1	1	0	1
International Journal of Human Genetics			International journal of human genetics	International Journal of Human Genetics	International Journal of Human Genetics	INT J HUM GENET	09723757	09723757	1	1	1	0	0	1	1	1	1	0.187
International Journal of Hypertension		International Journal of Hypertension	International journal of hypertension	International Journal of Hypertension	International Journal of Hypertension		20900384	20900392	1	1	1	0	1	1	1	0	1
International Journal of Medical Sciences	International journal of medical sciences	International Journal of Medical Sciences	International journal of medical sciences	International Journal of Medical Sciences	International Journal of Medical Sciences	INT J MED SCI	14491907	14491907	1	1	1	1	1	1	1	1	1	2.065
International Journal of Mental Health Systems		International Journal of Mental Health Systems	International journal of mental health systems	International Journal of Mental Health Systems	International Journal of Mental Health Systems	INT J MENT HEALTH SY	17524458	17524458	1	1	1	0	1	1	1	1	1	1.062
International Journal of Molecular Epidemiology and Genetics		International Journal of Molecular Epidemiology and Genetics	International journal of molecular epidemiology and genetics	International Journal of Molecular Epidemiology and Genetics	International Journal of Molecular Epidemiology and Genetics		19481756	19481756	1	1	1	0	1	1	1	0	1
International Journal of Molecular Sciences	International journal of molecular sciences	International Journal of Molecular Sciences	International journal of molecular sciences	International Journal of Molecular Sciences	International Journal of Molecular Sciences	INT J MOL SCI	16616596	14220067	1	1	1	1	1	1	1	1	1	2.464
International journal of nanomedicine	International journal of nanomedicine	International Journal of Nanomedicine	International journal of nanomedicine	International Journal of Nanomedicine	International Journal of Nanomedicine	INT J NANOMED	11769114	11782013	1	1	1	1	1	1	1	1	1	3.463
International Journal of Occupational and Environmental Medicine	The international journal of occupational and environmental medicine		The international journal of occupational and environmental medicine	International Journal of Occupational and Environmental Medicine	International Journal of Occupational and Environmental Medicine		20086520	20086814	1	1	1	1	0	1	1	0	1
International Journal of Organ Transplantation Medicine				International Journal of Organ Transplantation Medicine	International Journal of Organ Transplantation Medicine		20086490	20086482	1	1	1	0	0	0	1	0	1
International Journal of Peptides		International Journal of Peptides	International journal of peptides	International Journal of Peptides	International Journal of Peptides		16879767	16879775	1	1	1	0	1	1	1	0	1
International Journal of Pharmacology				International Journal of Pharmacology	International Journal of Pharmacology	INT J PHARMACOL	18117775	18125700	1	1	1	0	0	0	1	1	1	1.202
International Journal of Pharmacy and Pharmaceutical Sciences				International Journal of Pharmacy and Pharmaceutical Sciences	International Journal of Pharmacy and Pharmaceutical Sciences		09751491	09751491	1	1	1	0	0	0	1	0	1
International Journal of Pharmacy and Technology				International Journal of Pharmacy and Technology	International Journal of Pharmacy and Technology		0975766X	0975766X	1	1	1	0	0	0	1	0	1
International Journal of Physiology, Pathophysiology and Pharmacology		International Journal of Physiology, Pathophysiology and Pharmacology	International journal of physiology, pathophysiology and pharmacology	International Journal of Physiology, Pathophysiology and Pharmacology	International Journal of Physiology, Pathophysiology and Pharmacology		19448171	19448171	1	1	1	0	1	1	1	0	1
International Journal of Phytomedicine				International Journal of Phytomedicine	International Journal of Phytomedicine		09750185	09750185	1	1	1	0	0	0	1	0	1
International Journal of Preventive Medicine		International Journal of Preventive Medicine	International journal of preventive medicine	International Journal of Preventive Medicine	International Journal of Preventive Medicine		20087802	20088213	1	1	1	0	1	1	1	0	1
International Journal of Qualitative Studies on Health and Well-being	International journal of qualitative studies on health and well-being	International Journal of Qualitative Studies on Health and Well-being	International journal of qualitative studies on health and well-being	International journal of qualitative studies on health and well-being	International Journal of Qualitative Studies on Health & Well-Being	INT J QUAL STUD HEAL	17482623	17482631	1	1	1	1	1	1	1	1	1	0.612
International Journal of Rheumatology		International Journal of Rheumatology	International journal of rheumatology	International Journal of Rheumatology	International Journal of Rheumatology		16879260	16879279	1	1	1	0	1	1	1	0	1
International Journal of Surgical Oncology	International journal of surgical oncology	International Journal of Surgical Oncology	International journal of surgical oncology	International journal of surgical oncology	International Journal of Surgical Oncology		20901402	20901410	1	1	1	1	1	1	1	0	1
International Journal of Telemedicine and Applications		International Journal of Telemedicine and Applications	International journal of telemedicine and applications	International Journal of Telemedicine and Applications	International Journal of Telemedicine and Applications		16876415	16876423	1	1	1	0	1	1	1	0	1
International Journal of Vascular Medicine		International Journal of Vascular Medicine	International journal of vascular medicine	International Journal of Vascular Medicine	International Journal of Vascular Medicine		20902824	20902832	1	1	1	0	1	1	1	0	1
International Microbiology	International microbiology : the official journal of the Spanish Society for Microbiology		International microbiology : the official journal of the Spanish Society for Microbiology	International microbiology : the official journal of the Spanish Society for Microbiology	International Microbiology	INT MICROBIOL	11396709	16181905	1	1	1	1	0	1	1	1	1	2.556
Internet Journal of Microbiology			The Internet journal of microbiology	Internet Journal of Microbiology	The Internet Journal of Microbiology		19378289	19378289	1	1	1	0	0	1	1	0	1
Internet Journal of Toxicology				Internet Journal of Toxicology	The Internet Journal of Toxicology		15593916	15593916	1	1	1	0	0	0	1	0	1
Investigative Genetics		Investigative Genetics	Investigative genetics	Investigative Genetics	Investigative Genetics		20412223	20412223	1	1	1	0	1	1	1	0	1
Iranian Journal of Basic Medical Sciences		Iranian Journal of Basic Medical Sciences	Iranian journal of basic medical sciences	Iranian Journal of Basic Medical Sciences	Iranian Journal of Basic Medical Sciences	IRAN J BASIC MED SCI	20083866	20083874	1	1	1	0	1	1	1	1	1	0.243
Iranian Journal of Cancer Prevention				Iranian Journal of Cancer Prevention	Iranian Journal of Cancer Prevention		20082398	20082401	1	1	1	0	0	0	1	0	1
Iranian Journal of Child Neurology		Iranian Journal of Child Neurology	Iranian journal of child neurology	Iranian Journal of Child Neurology	Iranian Journal of Child Neurology		17354668	20080700	1	1	1	0	1	1	1	0	1
Iranian Journal of Immunology	Iranian journal of immunology : IJI		Iranian journal of immunology : IJI	Iranian Journal of Immunology	Iranian Journal of Immunology	IRAN J IMMUNOL	17351383	1735367X	1	1	1	1	0	1	1	1	1	0.492
Iranian Journal of Medical Sciences		Iranian Journal of Medical Sciences	Iranian journal of medical sciences	Iranian Journal of Medical Sciences	Iranian Journal of Medical Sciences		02530716	17353688	1	1	1	0	1	1	1	0	1
Iranian Journal of Microbiology		Iranian Journal of Microbiology	Iranian journal of microbiology	Iranian Journal of Microbiology	Iranian Journal of Microbiology		20083289	20084447	1	1	1	0	1	1	1	0	1
Iranian Journal of Nuclear Medicine				Iranian Journal of Nuclear Medicine	Iranian Journal of Nuclear Medicine		16812824	20082509	1	1	1	0	0	0	1	0	1
Iranian Journal of Otorhinolaryngology		Iranian Journal of Otorhinolaryngology	Iranian journal of otorhinolaryngology	Iranian Journal of Otorhinolaryngology	Iranian Journal of Otorhinolaryngology		22517251	2251726X	1	1	1	0	1	1	1	0	1
Iranian Journal of Parasitology		Iranian Journal of Parasitology	Iranian journal of parasitology	Iranian Journal of Parasitology	Iranian Journal of Parasitology	IRAN J PARASITOL	17357020	2008238X	1	1	1	0	1	1	1	1	1	0.326
Iranian Journal of Psychiatry		Iranian Journal of Psychiatry	Iranian journal of psychiatry	Iranian Journal of Psychiatry	Iranian Journal of Psychiatry		17354587	20082215	1	1	1	0	1	1	1	0	1
Iranian Journal of Psychiatry and Behavioral Sciences		Iranian Journal of Psychiatry and Behavioral Sciences	Iranian journal of psychiatry and behavioral sciences	Iranian Journal of Psychiatry and Behavioral Sciences	Iranian Journal of Psychiatry and Behavioral Sciences		17358639	17359287	1	1	1	0	1	1	1	0	1
Iranian Journal of Radiology		Iranian Journal of Radiology	Iranian journal of radiology : a quarterly journal published by the Iranian Radiological Society	Iranian Journal of Radiology	Iranian Journal of Radiology	IRAN J RADIOL	17351065	20082711	1	1	1	0	1	1	1	1	1	0.039
Iranian Journal of Reproductive Medicine		Iranian Journal of Reproductive Medicine	Iranian journal of reproductive medicine	Iranian Journal of Reproductive Medicine	Iranian Journal of Reproductive Medicine	IRAN J REPROD MED	16806433	20082177	1	1	1	0	1	1	1	1	1	0.188
Irish Medical Journal	Irish medical journal		Irish medical journal	Irish Medical Journal	Irish Medical Journal : Journal of the Irish Medical Association		03323102		1	1	1	1	0	1	1	0	1
Italian Journal of Pediatrics	Italian journal of pediatrics	Italian Journal of Pediatrics	Rivista italiana di pediatria = The Italian journal of pediatrics	Italian Journal of Pediatrics	The Italian Journal of Pediatrics	ITAL J PEDIATR	17208424	18247288	1	1	1	1	1	1	1	1	1	1.344
Japanese Journal of Infectious Diseases	Japanese journal of infectious diseases		Japanese journal of infectious diseases	Japanese Journal of Infectious Diseases	Japanese Journal of Infectious Diseases	JPN J INFECT DIS	13446304	18842836	1	1	1	1	0	1	1	1	1	1.507
JK Science				JK Science	JK Science : Journal of Medical Education & Research		09721177		1	1	1	0	0	0	1	0	1
Jornal brasileiro de nefrologia : orgão oficial de Sociedades Brasileira e Latino-Americana de Nefrologia	Jornal brasileiro de nefrologia : ?orgão oficial de Sociedades Brasileira e Latino-Americana de Nefrologia		Jornal brasileiro de nefrologia : 'orgao oficial de Sociedades Brasileira e Latino-Americana de Nefrologia	Jornal brasileiro de nefrologia : ?orgão oficial de Sociedades Brasileira e Latino-Americana de Nefrologia	Jornal Brasileiro de Nefrologia		01012800	21758239	1	1	1	1	0	1	1	0	1
Jornal Brasileiro de Pneumologia	Jornal brasileiro de pneumologia : publicaça?o oficial da Sociedade Brasileira de Pneumologia e Tisilogia		Jornal brasileiro de pneumologia : publicacao oficial da Sociedade Brasileira de Pneumologia e Tisilogia	Jornal brasileiro de pneumologia : publicaça?o oficial da Sociedade Brasileira de Pneumologia e Tisilogia	Jornal Brasileiro de Pneumologia		18063713	18063756	1	1	1	1	0	1	1	0	1
Jornal Brasileiro de Psiquiatria			Jornal brasileiro de psiquiatria	Jornal Brasileiro de Psiquiatria	Jornal Brasileiro de Psiquiatria		00472085	19820208	1	1	1	0	0	1	1	0	0
Jornal de Pediatria	Jornal de pediatria		Jornal de pediatria	Jornal de Pediatria	Jornal de Pediatria	J PEDIAT-BRAZIL	00217557	16784782	1	1	1	1	0	1	1	1	1	1.154
Jornal Vascular Brasileiro				Jornal Vascular Brasileiro	Jornal Vascular Brasileiro		16775449	16777301	1	1	1	0	0	0	1	0	1
Journal of the Canadian Dental Association	Journal (Canadian Dental Association)		Journal (Canadian Dental Association)	Journal (Canadian Dental Association)	Journal of the Canadian Dental Association	J CAN DENT ASSOC	14882159	14882159	1	1	1	1	0	1	1	1	1	0.624
Journal fuer Gastroenterologische und Hepatologische Erkrankungen				Journal fur Gastroenterologische und Hepatologische Erkrankungen	Journal fÃ¼r Gastroenterologische und Hepatologische Erkrankungen		17286263	17286271	1	1	1	0	0	0	1	0	0
Journal für Gynakologische Endokrinologie				Journal fur Gynakologische Endokrinologie	Journal fÃ¼r GynÃ¤kologische Endokrinologie		19976690	19961553	1	1	1	0	0	0	1	0	0
Journal für Hypertonie				Journal fur Hypertonie	Journal fÃ¼r Hypertonie		10282327	16809378	1	1	1	0	0	0	1	0	0
Journal für Kardiologie				Journal fur Kardiologie	Journal fÃ¼r Kardiologie		10240098	1680936X	1	1	1	0	0	0	1	0	0
Journal für Mineralstoffwechsel				Journal fur Mineralstoffwechsel	Journal fÃ¼r Mineralstoffwechsel		10237763	16809408	1	1	1	0	0	0	1	0	0
Journal für Neurologie, Neurochirurgie und Psychiatrie				Journal fur Neurologie, Neurochirurgie und Psychiatrie	Journal fÃ¼r Neurologie, Neurochirurgie und Psychiatrie		16081587	16809440	1	1	1	0	0	0	1	0	0
Journal für Reproduktionsmedizin und Endokrinologie				Journal fur Reproduktionsmedizin und Endokrinologie	Journal fÃ¼r Reproduktionsmedizin und Endokrinologie		18102107	18109292	1	1	1	0	0	0	1	0	0
Journal für Urologie und Urogynakologie				Journal fur Urologie und Urogynakologie	Journal fÃ¼r Urologie und UrogynÃ¤kologie		10236090	16809424	1	1	1	0	0	0	1	0	0
Journal of Advanced Pharmaceutical Technology and Research		Journal of Advanced Pharmaceutical Technology &#x0026; Research	Journal of advanced pharmaceutical technology & research	Journal of Advanced Pharmaceutical Technology and Research	Journal of Advanced Pharmaceutical Technology & Research		22314040	09762094	1	1	1	0	1	1	1	0	1
Journal of Aging Research		Journal of Aging Research	Journal of aging research	Journal of Aging Research	Journal of Aging Research		20902204	20902212	1	1	1	0	1	1	1	0	1
Journal of Anaesthesiology Clinical Pharmacology		Journal of Anaesthesiology, Clinical Pharmacology	Journal of anaesthesiology, clinical pharmacology	Journal of Anaesthesiology Clinical Pharmacology	Journal of Anaesthesiology Clinical Pharmacology		09709185	22312730	1	1	1	0	1	1	1	0	1
Journal of Analytical Methods in Chemistry		Journal of Analytical Methods in Chemistry	Journal of analytical methods in chemistry	Journal of Analytical Methods in Chemistry	Journal of Analytical Methods in Chemistry	J ANAL METHODS CHEM	20908865	20908873	1	1	1	0	1	1	1	1	1
Journal of applied clinical medical physics [electronic resource] / American College of Medical Physics	Journal of applied clinical medical physics / American College of Medical Physics		Journal of applied clinical medical physics / American College of Medical Physics	Journal of applied clinical medical physics / American College of Medical Physics	Journal of Applied Clinical Medical Physics	J APPL CLIN MED PHYS	15269914	15269914	1	1	1	1	0	1	1	1	1	0.959
Journal of Applied Oral Science	Journal of applied oral science : revista FOB	Journal of Applied Oral Science	Journal of applied oral science : revista FOB	Journal of applied oral science : revista FOB	Journal of Applied Oral Science	J APPL ORAL SCI	16787757	16787765	1	1	1	1	1	1	1	1	1	0.797
Journal of Applied Research			The journal of applied research	Journal of Applied Research	Journal of Applied Research in Clinical and Experimental Therapeutics		1537064X		1	1	1	0	0	1	1	0	1
Journal of atherosclerosis and thrombosis	Journal of atherosclerosis and thrombosis		Journal of atherosclerosis and thrombosis	Journal of Atherosclerosis and Thrombosis	Journal of Atherosclerosis and Thrombosis	J ATHEROSCLER THROMB	13403478	18803873	1	1	1	1	0	1	1	1	1	2.933
Journal of Athletic Training	Journal of athletic training	Journal of Athletic Training	Journal of athletic training	Journal of athletic training	Journal of Athletic Training	J ATHL TRAINING	10626050	1938162X	1	1	1	1	1	1	1	1	1	1.682
Journal of Atrial Fibrillation			Journal of atrial fibrillation	Journal of Atrial Fibrillation	Journal of Atrial Fibrillation		19416911	19416911	1	1	1	0	0	1	1	0	1
Journal of Ayub Medical College, Abbottabad : JAMC	Journal of Ayub Medical College, Abbottabad : JAMC		Journal of Ayub Medical College, Abbottabad : JAMC	Journal of Ayub Medical College, Abbottabad : JAMC	Journal of Ayub Medical College		10259589	18192718	1	1	1	1	0	1	1	0	1
Journal of Ayurveda and Integrative Medicine		Journal of Ayurveda and Integrative Medicine	Journal of Ayurveda and integrative medicine	Journal of Ayurveda and Integrative Medicine	Journal of Ayurveda and Integrative Medicine		09759476	09762809	1	1	1	0	1	1	1	0	1
Journal of B.U.ON.	Journal of B.U.ON. : official journal of the Balkan Union of Oncology		Journal of B.U.ON. : official journal of the Balkan Union of Oncology	Journal of B.U.ON.	Journal of Balkan Union of Oncology	J BUON	11070625	22416293	1	1	1	1	0	1	1	1	1	0.761
Journal of Biological Engineering		Journal of Biological Engineering	Journal of biological engineering	Journal of Biological Engineering	Journal of Biological Engineering		17541611	17541611	1	1	1	0	1	1	1	0	1
Journal of Biological Sciences				Journal of Biological Sciences	Journal of Biological Sciences		17273048	18125719	1	1	1	0	0	0	1	0	1
Journal of Biomedical Science	Journal of biomedical science	Journal of Biomedical Science	Journal of biomedical science	Journal of Biomedical Science	Journal of Biomedical Science	J BIOMED SCI	10217770	14230127	1	1	1	1	1	1	1	1	1	2.458
Journal of Biosciences	Journal of biosciences		Journal of biosciences	Journal of Biosciences	Journal of Biosciences	J BIOSCIENCES	02505991	09737138	1	1	1	1	0	1	1	1	1	1.759
Journal of Brachial Plexus and Peripheral Nerve Injury		Journal of Brachial Plexus and Peripheral Nerve Injury	Journal of brachial plexus and peripheral nerve injury	Journal of Brachial Plexus and Peripheral Nerve Injury	Journal of Brachial Plexus and Peripheral Nerve Injury		17497221	17497221	1	1	1	0	1	1	1	0	1
Journal of Cancer		Journal of Cancer	Journal of Cancer	Journal of Cancer	Journal of Cancer		18379664	18379664	1	1	1	0	1	1	1	0	1
Journal of Cancer Epidemiology		Journal of Cancer Epidemiology	Journal of cancer epidemiology	Journal of Cancer Epidemiology	Journal of Cancer Epidemiology		16878558	16878566	1	1	1	0	1	1	1	0	1
Journal of Cancer Research and Therapeutics	Journal of cancer research and therapeutics		Journal of cancer research and therapeutics	Journal of Cancer Research and Therapeutics	Journal of Cancer Research and Therapeutics	J CANCER RES THER	09731482	19984138	1	1	1	1	0	1	1	1	1	0.761
Journal of Carcinogenesis		Journal of Carcinogenesis	Journal of carcinogenesis	Journal of Carcinogenesis	Journal of Carcinogenesis		09746773	14773163	1	1	1	0	1	1	1	0	1
Journal of Cardiothoracic Surgery	Journal of cardiothoracic surgery	Journal of Cardiothoracic Surgery	Journal of cardiothoracic surgery	Journal of cardiothoracic surgery	Journal of Cardiothoracic Surgery	J CARDIOTHORAC SURG	17498090	17498090	1	1	1	1	1	1	1	1	1	0.9
Journal of Cardiovascular Magnetic Resonance	Journal of cardiovascular magnetic resonance : official journal of the Society for Cardiovascular Magnetic Resonance	Journal of Cardiovascular Magnetic Resonance	Journal of cardiovascular magnetic resonance : official journal of the Society for Cardiovascular Magnetic Resonance	Journal of Cardiovascular Magnetic Resonance	Journal of Cardiovascular Magnetic Resonance	J CARDIOVASC MAGN R	10976647	1532429X	1	1	1	1	1	1	1	1	1	4.435
Journal of Cell Death			Journal of cell death	Journal of Cell Death	Journal of Cell Death		11790660	11790660	1	1	1	0	0	1	1	0	1
Journal of Cellular and Molecular Medicine	Journal of cellular and molecular medicine		Journal of cellular and molecular medicine	Journal of cellular and molecular medicine	Journal of Cellular and Molecular Medicine	J CELL MOL MED	15824934	15824934	1	1	1	1	0	1	1	1	1	4.753
Journal of Clinical and Analytical Medicine				Journal of Clinical and Analytical Medicine	Journal of Clinical and Analytical Medicine		13090720	13092014	1	1	1	0	0	0	1	0	1
Journal of Clinical and Diagnostic Research		Journal of Clinical and Diagnostic Research : JCDR	Journal of clinical and diagnostic research : JCDR	Journal of Clinical and Diagnostic Research	Journal of Clinical and Diagnostic Research		2249782X	0973709X	1	1	1	0	1	1	1	0	1
Journal of clinical and experimental hematopathology : JCEH	Journal of clinical and experimental hematopathology : JCEH		Journal of clinical and experimental hematopathology : JCEH	Journal of clinical and experimental hematopathology : JCEH	Journal of Clinical and Experimental Hematopathology		13464280	18809952	1	1	1	1	0	1	1	0	1
Journal of Contemporary Brachytherapy		Journal of Contemporary Brachytherapy	Journal of contemporary brachytherapy	Journal of Contemporary Brachytherapy	Journal of Contemporary Brachytherapy		1689832X	20812841	1	1	1	0	1	1	1	0	1
Journal of Craniovertebral Junction and Spine		Journal of Craniovertebral Junction and Spine	Journal of craniovertebral junction and spine	Journal of Craniovertebral Junction and Spine	Journal of Craniovertebral Junction and Spine		09748237	09769285	1	1	1	0	1	1	1	0	1
Journal of Diabetes and Metabolic Disorders		Journal of Diabetes and Metabolic Disorders	Journal of diabetes and metabolic disorders	Journal of Diabetes and Metabolic Disorders	Journal of Diabetes & Metabolic Disorders		22516581	22516581	1	1	1	0	1	1	1	0	1
Journal of Diabetes Research	Journal of diabetes research	Journal of Diabetes Research	Journal of diabetes research	Journal of Diabetes Research	Journal of Diabetes Research		23146745	23146753	1	1	1	1	1	1	1	0	1
Journal of Emergencies, Trauma and Shock		Journal of Emergencies, Trauma, and Shock	Journal of emergencies, trauma, and shock	Journal of Emergencies, Trauma and Shock	Journal of Emergencies, Trauma and Shock		09742700	0974519X	1	1	1	0	1	1	1	0	1
Journal of Emergency Medicine, Trauma and Acute Care				Journal of Emergency Medicine, Trauma and Acute Care	Journal of Emergency Medicine, Trauma and Acute Care		19997086	19997094	1	1	1	0	0	0	1	0	1
Journal of Environmental and Public Health	Journal of environmental and public health	Journal of Environmental and Public Health	Journal of environmental and public health	Journal of Environmental and Public Health	Journal of Environmental and Public Health		16879805	16879813	1	1	1	1	1	1	1	0	1
Journal of Environmental Biology	Journal of environmental biology / Academy of Environmental Biology, India		Journal of environmental biology / Academy of Environmental Biology, India	Journal of environmental biology / Academy of Environmental Biology, India	Journal of Environmental Biology	J ENVIRON BIOL	02548704	02548704	1	1	1	1	0	1	1	1	1	0.682
Journal of Epidemiology	Journal of epidemiology / Japan Epidemiological Association	Journal of Epidemiology	Journal of epidemiology / Japan Epidemiological Association	Journal of epidemiology / Japan Epidemiological Association	Journal of Epidemiology	J EPIDEMIOL	09175040	13499092	1	1	1	1	1	1	1	1	1	2.113
Journal of Epilepsy and Clinical Neurophysiology				Journal of Epilepsy and Clinical Neurophysiology	Journal of Epilepsy and Clinical Neurophysiology		16762649		1	1	1	0	0	0	1	0	1
Journal of Epithelial Biology and Pharmacology			Journal of epithelial biology & pharmacology	Journal of Epithelial Biology and Pharmacology	Journal of Epithelial Biology & Pharmacology		18750443	18750443	1	1	1	0	0	1	1	0	1
Journal of Ethnobiology and Ethnomedicine	Journal of ethnobiology and ethnomedicine	Journal of Ethnobiology and Ethnomedicine	Journal of ethnobiology and ethnomedicine	Journal of ethnobiology and ethnomedicine	Journal of Ethnobiology and Ethnomedicine	J ETHNOBIOL ETHNOMED	17464269	17464269	1	1	1	1	1	1	1	1	1	2.423
Journal of Excipients and Food Chemicals				Journal of Excipients and Food Chemicals	Journal of Excipients and Food Chemicals		21502668	21502668	1	1	1	0	0	0	1	0	1
Journal of Experimental and Clinical Cancer Research	Journal of experimental & clinical cancer research : CR	Journal of Experimental &#x0026; Clinical Cancer Research : CR	Journal of experimental & clinical cancer research : CR	Journal of Experimental and Clinical Cancer Research	Journal of Experimental & Clinical Cancer Research	J EXP CLIN CANC RES	17569966	17569966	1	1	1	1	1	1	1	1	1	3.066
Journal of Experimental Stroke and Translational Medicine			Journal of experimental stroke & translational medicine	Journal of Experimental Stroke and Translational Medicine	Journal of Experimental Stroke & Translational Medicine		1939067X	1939067X	1	1	1	0	0	1	1	0	1
Journal of Genetics	Journal of genetics		Journal of genetics	Journal of genetics	Journal of Genetics	J GENET	00221333	09737731	1	1	1	1	0	1	1	1	1	0.876
Journal of Geriatric Cardiology		Journal of Geriatric Cardiology : JGC	Journal of geriatric cardiology : JGC	Journal of Geriatric Cardiology	Journal of Geriatric Cardiology		16715411		1	1	1	0	1	1	1	0	1
Journal of Global Drug Policy and Practice				Journal of Global Drug Policy and Practice	Journal of Global Drug Policy and Practice		19344708	19344708	1	1	1	0	0	0	1	0	1
Journal of Global Infectious Diseases		Journal of Global Infectious Diseases	Journal of global infectious diseases	Journal of Global Infectious Diseases	Journal of Global Infectious Diseases		0974777X	09748245	1	1	1	0	1	1	1	0	1
Journal of Headache and Pain	The journal of headache and pain	The Journal of Headache and Pain	The journal of headache and pain	Journal of Headache and Pain	Journal of Headache and Pain	J HEADACHE PAIN	11292369	11292377	1	1	1	1	1	1	1	1	1	2.779
Journal of Hematology and Oncology	Journal of hematology & oncology	Journal of Hematology &#x0026; Oncology	Journal of hematology & oncology	Journal of Hematology and Oncology	Journal of Hematology & Oncology	J HEMATOL ONCOL	17568722	17568722	1	1	1	1	1	1	1	1	1	4.458
Journal of Human Reproductive Sciences		Journal of Human Reproductive Sciences	Journal of human reproductive sciences	Journal of Human Reproductive Sciences	Journal of Human Reproductive Sciences		09741208	19984766	1	1	1	0	1	1	1	0	1
Journal of Indian Association for Child and Adolescent Mental Health				Journal of Indian Association for Child and Adolescent Mental Health	Journal of Indian Association for Child and Adolescent Mental Health		09731342		1	1	1	0	0	0	1	0	1
Journal of Injury and Violence Research	Journal of injury & violence research	Journal of Injury and Violence Research	Journal of injury & violence research	Journal of injury & violence research	Journal of Injury and Violence Research		20082053	20084072	1	1	1	1	1	1	1	0	1
Journal of Insect Science	Journal of insect science (Online)	Journal of Insect Science	Journal of insect science (Online)	Journal of insect science (Online)	Journal of Insect Science	J INSECT SCI	15362442	15362442	1	1	1	1	1	1	1	1	1	0.875
Journal of integrative bioinformatics	Journal of integrative bioinformatics		Journal of integrative bioinformatics	Journal of integrative bioinformatics	Journal of Integrative Bioinformatics		16134516	16134516	1	1	1	1	0	1	1	0	1
Journal of integrative medicine	Journal of integrative medicine		Journal of integrative medicine	Journal of Integrative Medicine	Journal of Integrative Medicine (JIM)		20954964		1	1	1	1	0	1	1	0	1
Journal of Investigational Allergology and Clinical Immunology	Journal of investigational allergology & clinical immunology		Journal of investigational allergology & clinical immunology	Journal of Investigational Allergology and Clinical Immunology	Journal of Investigational Allergology and Clinical Immunology	J INVEST ALLERG CLIN	10189068	16980808	1	1	1	1	0	1	1	1	1	1.887
Journal of Isfahan Medical School				Journal of Isfahan Medical School	Journal of Isfahan Medical School		10277595	1735854X	1	1	1	0	0	0	1	0	0
Journal of Korean Medical Science	Journal of Korean medical science	Journal of Korean Medical Science	Journal of Korean medical science	Journal of Korean medical science	Journal of Korean Medical Science	J KOREAN MED SCI	10118934	15986357	1	1	1	1	1	1	1	1	1	1.249
Journal of Mathematical Neuroscience		Journal of Mathematical Neuroscience	Journal of mathematical neuroscience	Journal of Mathematical Neuroscience	Journal of Mathematical Neuroscience		21908567	21908567	1	1	1	0	1	1	1	0	1
Journal of Mazandaran University of Medical Sciences				Journal of Mazandaran University of Medical Sciences	Journal of Mazandaran University of Medical Sciences		17359279	17359279	1	1	1	0	0	0	1	0	0
Journal of Medical and Surgical Intensive Care Medicine				Journal of Medical and Surgical Intensive Care Medicine	Turkish Journal of Medical and Surgical Intensive Care Medicine		13091689	13096222	1	1	1	0	0	0	1	0	1
Journal of Medical Biochemistry				Journal of Medical Biochemistry	Journal of Medical Biochemistry	J MED BIOCHEM	14528258	14528266	1	1	1	0	0	0	1	1	1	1.084
Journal of Medical Investigation	The journal of medical investigation : JMI		The journal of medical investigation : JMI	Journal of Medical Investigation	Journal of Medical Investigation		13431420	13496867	1	1	1	1	0	1	1	0	1
Journal of Medical Physics		Journal of Medical Physics / Association of Medical Physicists of India	Journal of medical physics / Association of Medical Physicists of India	Journal of Medical Physics	Journal of Medical Physics		09716203	19983913	1	1	1	0	1	1	1	0	1
Journal of Medical Sciences				Journal of Medical Sciences (Faisalabad)	Journal of Medical Sciences		16824474	18125727	1	1	1	0	0	0	1	0	1
Journal of Medicine (Bangladesh)				Journal of Medicine (Bangladesh)	Journal of Medicine		19979797	20755384	1	1	1	0	0	0	1	0	1
Journal of Minimal Access Surgery		Journal of Minimal Access Surgery	Journal of minimal access surgery	Journal of Minimal Access Surgery	Journal of Minimal Access Surgery		09729941	19983921	1	1	1	0	1	1	1	0	1
Journal of Molecular Signaling		Journal of Molecular Signaling	Journal of molecular signaling	Journal of Molecular Signaling	Journal of Molecular Signaling		17502187	17502187	1	1	1	0	1	1	1	0	1
Journal of Multidisciplinary Healthcare		Journal of Multidisciplinary Healthcare	Journal of multidisciplinary healthcare	Journal of Multidisciplinary Healthcare	Journal of Multidisciplinary Healthcare		11782390	11782390	1	1	1	0	1	1	1	0	1
Journal of Musculoskeletal Neuronal Interactions	Journal of musculoskeletal & neuronal interactions		Journal of musculoskeletal & neuronal interactions	Journal of Musculoskeletal Neuronal Interactions	The Journal of Musculoskeletal and Neuronal Interactions	J MUSCULOSKEL NEURON	11087161	11087161	1	1	1	1	0	1	1	1	1	2.453
Journal of Nanobiotechnology	Journal of nanobiotechnology	Journal of Nanobiotechnology	Journal of nanobiotechnology	Journal of Nanobiotechnology	Journal of Nanobiotechnology		14773155	14773155	1	1	1	1	1	1	1	0	1
Journal of Negative Results in BioMedicine	Journal of negative results in biomedicine	Journal of Negative Results in Biomedicine	Journal of negative results in biomedicine	Journal of Negative Results in BioMedicine	Journal of Negative Results in Biomedicine		14775751	14775751	1	1	1	1	1	1	1	0	1
Journal of Nepal Paediatric Society				Journal of Nepal Paediatric Society	Journal of Nepal Paediatric Society		19907974	19907982	1	1	1	0	0	0	1	0	1
Journal of NeuroEngineering and Rehabilitation	Journal of neuroengineering and rehabilitation	Journal of NeuroEngineering and Rehabilitation	Journal of neuroengineering and rehabilitation	Journal of NeuroEngineering and Rehabilitation	Journal of NeuroEngineering and Rehabilitation	J NEUROENG REHABIL	17430003	17430003	1	1	1	1	1	1	1	1	1	2.567
Journal of Neurological Sciences			Journal of neurological sciences (Turkish)	Journal of Neurological Sciences	Journal of Neurological Sciences	J NEUROL SCI-TURK	13001817	13021664	1	1	1	0	0	1	1	1	1	0.138
Journal of Neurosciences in Rural Practice		Journal of Neurosciences in Rural Practice	Journal of neurosciences in rural practice	Journal of Neurosciences in Rural Practice	Journal of Neurosciences in Rural Practice		09763147	09763155	1	1	1	0	1	1	1	0	1
Journal of Nippon Medical School = Nihon Ika Daigaku zasshi	Journal of Nippon Medical School = Nippon Ika Daigaku zasshi		Journal of Nippon Medical School = Nippon Ika Daigaku zasshi	Journal of Nippon Medical School	Journal of Nippon Medical School		13454676	13473409	1	1	1	1	0	1	1	0	1
Journal of Nucleic Acids		Journal of Nucleic Acids	Journal of nucleic acids	Journal of Nucleic Acids	Journal of Nucleic Acids		20900201	2090021X	1	1	1	0	1	1	1	0	1
Journal of Nucleic Acids Investigation			Journal of nucleic acids investigation	Journal of Nucleic Acids Investigation	Journal of Nucleic Acids Investigation		20367996	20356005	1	1	1	0	0	1	1	0	1
Journal of Obesity	Journal of obesity	Journal of Obesity	Journal of obesity	Journal of Obesity	Journal of Obesity		20900708	20900716	1	1	1	1	1	1	1	0	1
Journal of Occupational Health	Journal of occupational health		Journal of occupational health	Journal of occupational health	Journal of Occupational Health	J OCCUP HEALTH	13419145	13489585	1	1	1	1	0	1	1	1	1	1.634
Journal of Occupational Medicine and Toxicology		Journal of Occupational Medicine and Toxicology (London, England)	Journal of occupational medicine and toxicology (London, England)	Journal of Occupational Medicine and Toxicology	Journal of Occupational Medicine and Toxicology	J OCCUP MED TOXICOL	17456673	17456673	1	1	1	0	1	1	1	1	1	1.403
Journal of Oncology		Journal of Oncology	Journal of oncology	Journal of Oncology	Journal of Oncology		16878450	16878469	1	1	1	0	1	1	1	0	1
Journal of Ophthalmic Inflammation and Infection		Journal of Ophthalmic Inflammation and Infection	Journal of ophthalmic inflammation and infection	Journal of Ophthalmic Inflammation and Infection	Journal of Ophthalmic Inflammation and Infection		18695760	18695760	1	1	1	0	1	1	1	0	1
Journal of Optometry	Journal of optometry	Journal of Optometry	Journal of optometry	Journal of optometry	Journal of Optometry		18884296	19891342	1	1	1	1	1	1	1	0	1
Journal of Oral Microbiology		Journal of Oral Microbiology	Journal of oral microbiology	Journal of Oral Microbiology	Journal of Oral Microbiology		20002297	20002297	1	1	1	0	1	1	1	0	1
Journal of oral science	Journal of oral science		Journal of oral science	Journal of oral science	Journal of Oral Science		13434934	18804926	1	1	1	1	0	1	1	0	1
Journal of Orthopaedic Surgery	Journal of orthopaedic surgery (Hong Kong)		Journal of orthopaedic surgery (Hong Kong)	Journal of orthopaedic surgery (Hong Kong)	Journal of Orthopaedic Surgery		10225536		1	1	1	1	0	1	1	0	1
Journal of Orthopaedic Surgery and Research	Journal of orthopaedic surgery and research	Journal of Orthopaedic Surgery and Research	Journal of orthopaedic surgery and research	Journal of orthopaedic surgery and research	Journal of Orthopaedic Surgery and Research	J ORTHOP SURG RES	1749799X	1749799X	1	1	1	1	1	1	1	1	1	1.013
Journal of Orthopaedics and Traumatology	Journal of orthopaedics and traumatology : official journal of the Italian Society of Orthopaedics and Traumatology	Journal of Orthopaedics and Traumatology : Official Journal of the Italian Society of Orthopaedics and Traumatology	Journal of orthopaedics and traumatology : official journal of the Italian Society of Orthopaedics and Traumatology	Journal of Orthopaedics and Traumatology	Journal of Orthopaedics and Traumatology		15909921	15909999	1	1	1	1	1	1	1	0	1
Journal of Osteoporosis		Journal of Osteoporosis	Journal of osteoporosis	Journal of Osteoporosis	Journal of Osteoporosis		20908059	20420064	1	1	1	0	1	1	1	0	1
Journal of Otolaryngology - Head and Neck Surgery	Journal of otolaryngology - head & neck surgery = Le Journal d'oto-rhino-laryngologie et de chirurgie cervico-faciale	Journal of Otolaryngology - Head &#x0026; Neck Surgery	Journal of otolaryngology - head & neck surgery = Le Journal d'oto-rhino-laryngologie et de chirurgie cervico-faciale	Journal of Otolaryngology - Head and Neck Surgery	Journal of Otolaryngology : Head and Neck Surgery	J OTOLARYNGOL-HEAD N	19160216	19160216	1	1	1	1	1	1	1	1	1	0.835
Journal of Ovarian Research		Journal of Ovarian Research	Journal of ovarian research	Journal of Ovarian Research	Journal of Ovarian Research	J OVARIAN RES	17572215	17572215	1	1	1	0	1	1	1	1	1	2.429
Journal of Pain Research		Journal of Pain Research	Journal of pain research	Journal of Pain Research	Journal of Pain Research		11787090	11787090	1	1	1	0	1	1	1	0	1
Journal of Parasitology Research		Journal of Parasitology Research	Journal of parasitology research	Journal of Parasitology Research	Journal of Parasitology Research		20900023	20900031	1	1	1	0	1	1	1	0	1
Journal of Pediatric Neurosciences		Journal of Pediatric Neurosciences	Journal of pediatric neurosciences	Journal of Pediatric Neurosciences	Journal of Pediatric Neurosciences		18171745	19983948	1	1	1	0	1	1	1	0	1
Journal of Pharmacological Sciences	Journal of pharmacological sciences		Journal of pharmacological sciences	Journal of Pharmacological Sciences	Journal of Pharmacological Sciences	J PHARMACOL SCI	13478613	13478648	1	1	1	1	0	1	1	1	1	2.15
Journal of Pharmacology and Pharmacotherapeutics		Journal of Pharmacology &#x0026; Pharmacotherapeutics	Journal of pharmacology & pharmacotherapeutics	Journal of Pharmacology and Pharmacotherapeutics	Journal of Pharmacology and Pharmacotherapeutics		0976500X	09765018	1	1	1	0	1	1	1	0	1
Journal of Pharmacy and Bioallied Sciences		Journal of Pharmacy &#x0026; Bioallied Sciences	Journal of pharmacy & bioallied sciences	Journal of Pharmacy and Bioallied Sciences	Journal of Pharmacy and Bioallied Sciences		09764879	09757406	1	1	1	0	1	1	1	0	1
Journal of Pharmacy and Pharmaceutical Sciences	Journal of pharmacy & pharmaceutical sciences : a publication of the Canadian Society for Pharmaceutical Sciences, Société canadienne des sciences pharmaceutiques		Journal of pharmacy & pharmaceutical sciences : a publication of the Canadian Society for Pharmaceutical Sciences, Societe canadienne des sciences pharmaceutiques	Journal of Pharmacy and Pharmaceutical Sciences	Journal of Pharmacy and Pharmaceutical Sciences	J PHARM PHARM SCI	14821826	14821826	1	1	1	1	0	1	1	1	1	2.198
Journal of Physical Therapy				Journal of Physical Therapy	Journal of Physical Therapy		20790015	20799209	1	1	1	0	0	0	1	0	1
Journal of physiological anthropology	Journal of physiological anthropology	Journal of Physiological Anthropology	Journal of physiological anthropology	Journal of physiological anthropology	Journal of Physiological Anthropology	J PHYSIOL ANTHROPOL	18806791	18806805	1	1	1	1	1	1	1	1	1	0.632
Journal of Physiology and Pharmacology	Journal of physiology and pharmacology : an official journal of the Polish Physiological Society		Journal of physiology and pharmacology : an official journal of the Polish Physiological Society	Journal of Physiology and Pharmacology	Journal of Physiology and Pharmacology	J PHYSIOL PHARMACOL	08675910	18991505	1	1	1	1	0	1	1	1	1	2.476
Journal of Postgraduate Medical Institute				Journal of Postgraduate Medical Institute	JPMI		10135472	18119387	1	1	1	0	0	0	1	0	1
Journal of Postgraduate Medicine	Journal of postgraduate medicine		Journal of postgraduate medicine	Journal of Postgraduate Medicine	Journal of Postgraduate Medicine	J POSTGRAD MED	00223859	09722823	1	1	1	1	0	1	1	1	1	1.078
Journal of Pregnancy	Journal of pregnancy	Journal of Pregnancy	Journal of pregnancy	Journal of pregnancy	Journal of Pregnancy		20902727	20902735	1	1	1	1	1	1	1	0	1
Journal of Primary Health Care	Journal of primary health care		Journal of primary health care	Journal of primary health care	Journal of Primary Health Care		11726164	11726156	1	1	1	1	0	1	1	0	1
Journal of Psychiatry and Neuroscience	Journal of psychiatry & neuroscience : JPN	Journal of Psychiatry &#x0026; Neuroscience : JPN	Journal of psychiatry & neuroscience : JPN	Journal of Psychiatry and Neuroscience	Journal of Psychiatry and Neuroscience	J PSYCHIATR NEUROSCI	11804882	14882434	1	1	1	1	1	1	1	1	1	6.242
Journal of Radiation Research	Journal of radiation research	Journal of Radiation Research	Journal of radiation research	Journal of radiation research	Journal of Radiation Research	J RADIAT RES	04493060	13499157	1	1	1	1	1	1	1	1	1	1.447
Journal of Radiology Case Reports	Journal of radiology case reports	Journal of Radiology Case Reports	Journal of radiology case reports	Journal of Radiology Case Reports	Journal of Radiology Case Reports		19430922	19430922	1	1	1	1	1	1	1	0	1
Journal of Reproduction and Infertility		Journal of Reproduction &#x0026; Infertility	Journal of reproduction & infertility	Journal of Reproduction and Infertility	Journal of Reproduction and Infertility		22285482	2251676X	1	1	1	0	1	1	1	0	1
Journal of Research in Health Sciences				Journal of Research in Health Sciences	Journal of Research in Health Sciences		16822765		1	1	1	0	0	0	1	0	1
Journal of Research in Medical Sciences		Journal of Research in Medical Sciences : The Official Journal of Isfahan University of Medical Sciences	Journal of research in medical sciences : the official journal of Isfahan University of Medical Sciences	Journal of Research in Medical Sciences	Journal of Research in Medical Sciences	J RES MED SCI	17351995	17357136	1	1	1	0	1	1	1	1	1	0.684
Journal of Smooth Muscle Research	Journal of smooth muscle research = Nihon Heikatsukin Gakkai kikanshi		Journal of smooth muscle research = Nihon Heikatsukin Gakkai kikanshi	Journal of smooth muscle research = Nihon Heikatsukin Gakkai kikanshi	Journal of Smooth Muscle Research		09168737	18848796	1	1	1	1	0	1	1	0	1
Journal of Stem Cells and Regenerative Medicine		Journal of Stem Cells &#x0026; Regenerative Medicine	Journal of stem cells & regenerative medicine	Journal of Stem Cells and Regenerative Medicine	Journal of Stem Cells and Regenerative Medicine		09737154	09737154	1	1	1	0	1	1	1	0	1
Journal of Tehran University Heart Center		The Journal of Tehran University Heart Center	The journal of Tehran Heart Center	Journal of Tehran University Heart Center	Journal of Tehran University Heart Center		17358620	20082371	1	1	1	0	1	1	1	0	1
Journal of the American Board of Family Medicine	Journal of the American Board of Family Medicine : JABFM		Journal of the American Board of Family Medicine : JABFM	Journal of the American Board of Family Medicine	Journal of the American Board of Family Medicine	J AM BOARD FAM MED	15572625	15587118	1	1	1	1	0	1	1	1	1	1.758
Journal of the California Dental Association	Journal of the California Dental Association		Journal of the California Dental Association	Journal of the California Dental Association	Journal of the California Dental Association		10432256	19424396	1	1	1	1	0	1	1	0	1
Journal of the Canadian Academy of Child and Adolescent Psychiatry		Journal of the Canadian Academy of Child and Adolescent Psychiatry	Journal of the Canadian Academy of Child and Adolescent Psychiatry = Journal de l'Academie canadienne de psychiatrie de l'enfant et de l'adolescent	Journal of the Canadian Academy of Child and Adolescent Psychiatry	Journal of the Canadian Academy of Child and Adolescent Psychiatry		17198429		1	1	1	0	1	1	1	0	1
Journal of the Indian Society of Pedodontics and Preventive Dentistry	Journal of the Indian Society of Pedodontics and Preventive Dentistry		Journal of the Indian Society of Pedodontics and Preventive Dentistry	Journal of the Indian Society of Pedodontics and Preventive Dentistry	Journal of the Indian Society of Pedodontics and Preventive Dentistry		09704388	19983905	1	1	1	1	0	1	1	0	1
Journal of the International AIDS Society	Journal of the International AIDS Society	Journal of the International AIDS Society	Journal of the International AIDS Society	Journal of the International AIDS Society	Journal of the International AIDS Society	J INT AIDS SOC	17582652	17582652	1	1	1	1	1	1	1	1	1	3.936
Journal of the Liaquat University of Medical and Health Sciences				Journal of the Liaquat University of Medical and Health Sciences	JLUMHS		17290341		1	1	1	0	0	0	1	0	1
Journal of the Medical Library Association : JMLA	Journal of the Medical Library Association : JMLA	Journal of the Medical Library Association : JMLA	Journal of the Medical Library Association : JMLA	Journal of the Medical Library Association : JMLA	Journal of the Medical Library Association	J MED LIBR ASSOC	15365050	15589439	1	1	1	1	1	1	1	1	1	0.976
Journal of the Nepal Medical Association	JNMA; journal of the Nepal Medical Association		JNMA; journal of the Nepal Medical Association	Journal of the Nepal Medical Association	Journal of Nepal Medical Association	J NEPAL MED ASSOC	00282715	1815672X	1	1	1	1	0	1	1	1	1	0.08
Journal of the Pancreas	JOP : Journal of the pancreas		JOP : Journal of the pancreas	Journal of the Pancreas	JOP Journal of the Pancreas		15908577	15908577	1	1	1	1	0	1	1	0	1
The journal of the Royal College of Physicians of Edinburgh	The journal of the Royal College of Physicians of Edinburgh		The journal of the Royal College of Physicians of Edinburgh	Journal of the Royal College of Physicians of Edinburgh	Journal of the Royal College of Physicians of Edinburgh		14782715	20428189	1	1	1	1	0	1	1	0	1
Journal of the Turkish German Gynecology Association		Journal of the Turkish German Gynecological Association	Journal of the Turkish German Gynecological Association	Journal of the Turkish German Gynecology Association	Journal of the Turkish-German Gynecological Association		13090399	13090380	1	1	1	0	1	1	1	0	1
Journal of Thyroid Research		Journal of Thyroid Research	Journal of thyroid research	Journal of Thyroid Research	Journal of Thyroid Research		20908067	20420072	1	1	1	0	1	1	1	0	1
Journal of Toxicologic Pathology		Journal of Toxicologic Pathology	Journal of toxicologic pathology	Journal of Toxicologic Pathology	Journal of Toxicologic Pathology	J TOXICOL PATHOL	09149198	1881915X	1	1	1	0	1	1	1	1	1	0.342
Journal of Toxicological Sciences	The Journal of toxicological sciences		The Journal of toxicological sciences	Journal of Toxicological Sciences	The Journal of Toxicological Sciences	J TOXICOL SCI	18803989	18803989	1	1	1	1	0	1	1	1	1	1.38
Journal of Toxicology		Journal of Toxicology	Journal of toxicology	Journal of Toxicology	Journal of Toxicology		16878191	16878205	1	1	1	0	1	1	1	0	1
Journal of Translational Medicine	Journal of translational medicine	Journal of Translational Medicine	Journal of translational medicine	Journal of Translational Medicine	Journal of Translational Medicine	J TRANSL MED	14795876	14795876	1	1	1	1	1	1	1	1	1	3.459
Journal of Tropical Medicine		Journal of Tropical Medicine	Journal of tropical medicine	Journal of Tropical Medicine	Journal of Tropical Medicine		16879686	16879694	1	1	1	0	1	1	1	0	1
Journal of Vector Borne Diseases	Journal of vector borne diseases		Journal of vector borne diseases	Journal of Vector Borne Diseases	Journal of Vector Borne Diseases	J VECTOR DIS	09729062	09729062	1	1	1	1	0	1	1	1	1	1.041
Journal of Venomous Animals and Toxins Including Tropical Diseases		The Journal of Venomous Animals and Toxins Including Tropical Diseases	The journal of venomous animals and toxins including tropical diseases	Journal of Venomous Animals and Toxins Including Tropical Diseases	Journal of Venomous Animals and Toxins including Tropical Diseases	J VENOM ANIM TOXINS	16789199	16789199	1	1	1	0	1	1	1	1	1	0.545
Journal of Veterinary Science	Journal of veterinary science	Journal of Veterinary Science	Journal of veterinary science	Journal of veterinary science	Journal of Veterinary Science	J VET SCI	1229845X	1976555X	1	1	1	1	1	1	1	1	1	0.926
Journal of Vision	Journal of vision	Journal of Vision	Journal of vision	Journal of vision	Journal of Vision	J VISION	15347362	15347362	1	1	1	1	1	1	1	1	1	2.479
Journal Phlebology and Lymphology				Journal Phlebology and Lymphology	Journal of Phlebology and Lymphology		19829450	19838905	1	1	1	0	0	0	1	0	1
Jundishapur Journal of Microbiology				Jundishapur Journal of Microbiology	Jundishapur Journal of Microbiology	JUNDISHAPUR J MICROB	20083645	20084161	1	1	1	0	0	0	1	1	1	0.383
Jundishapur Journal of Natural Pharmaceutical Products		Jundishapur Journal of Natural Pharmaceutical Products	Jundishapur journal of natural pharmaceutical products	Jundishapur Journal of Natural Pharmaceutical Products	Jundishapur Journal of Natural Pharmaceutical Products		17357780	22287876	1	1	1	0	1	1	1	0	1
Kardiologia Polska	Kardiologia polska		Kardiologia polska	Kardiologia Polska	Kardiologia Polska	KARDIOL POL	00229032	18974279	1	1	1	1	0	1	1	1	1	0.536
Kidney and Blood Pressure Research	Kidney & blood pressure research	Kidney &#x0026; Blood Pressure Research	Kidney & blood pressure research	Kidney and Blood Pressure Research	Kidney and Blood Pressure Research	KIDNEY BLOOD PRESS R	14204096	14230143	1	1	1	1	1	1	1	1	1	1.596
Klimik Dergisi				Klimik Dergisi	Klimik Journal		1301143X	13091484	1	1	1	0	0	0	1	0	1
Klinik Psikofarmakoloji Bulteni				Klinik Psikofarmakoloji Bulteni	Bulletin of Clinical Psychopharmacology - Klinik Psikofarmakoloji Bulteni	KLIN PSIKOFARMAKOL B	10177833	13029657	1	1	1	0	0	0	1	1	0	0.366
Koomesh				Koomesh	Koomesh		16087046		1	1	1	0	0	0	1	0	0
Korean Journal of Parasitology	The Korean journal of parasitology	The Korean Journal of Parasitology	The Korean journal of parasitology	Korean Journal of Parasitology	Korean Journal of Parasitology	KOREAN J PARASITOL	00234001	17380006	1	1	1	1	1	1	1	1	1	0.881
Korean Journal of Pediatrics		Korean Journal of Pediatrics	Korean journal of pediatrics	Korean Journal of Pediatrics	Korean Journal of Pediatrics		17381061	20927258	1	1	1	0	1	1	1	0	1
Korean Journal of Radiology	Korean journal of radiology : official journal of the Korean Radiological Society	Korean Journal of Radiology	Korean journal of radiology : official journal of the Korean Radiological Society	Korean Journal of Radiology	Korean Journal of Radiology	KOREAN J RADIOL	12296929	20058330	1	1	1	1	1	1	1	1	1	1.555
Leprosy Review	Leprosy review		Leprosy review	Leprosy review	Leprosy Review	LEPROSY REV	03057518	03057518	1	1	1	1	0	1	1	1	1	0.857
Lipid Insights			Lipid insights	Lipid Insights	Lipid Insights		11786353	11786353	1	1	1	0	0	1	1	0	1
Lung Cancer: Targets and Therapy				Lung Cancer: Targets and Therapy	Lung Cancer : Target and Therapy		11792728	11792728	1	1	1	0	0	0	1	0	1
Lung India		Lung India : Official Organ of Indian Chest Society	Lung India : official organ of Indian Chest Society	Lung India	Lung India		09702113	0974598X	1	1	1	0	1	1	1	0	1
Malaria Journal	Malaria journal	Malaria Journal	Malaria journal	Malaria Journal	Malaria Journal	MALARIA J	14752875	14752875	1	1	1	1	1	1	1	1	1	3.4
Malaysian Journal of Medical Sciences		The Malaysian Journal of Medical Sciences : MJMS	The Malaysian journal of medical sciences : MJMS	Malaysian Journal of Medical Sciences	Malaysian Journal of Medical Sciences		1394195X	21804303	1	1	1	0	1	1	1	0	1
Malta Medical Journal				Malta Medical Journal	Malta Medical Journal		18133339		1	1	1	0	0	0	1	0	1
Marine Drugs	Marine drugs	Marine Drugs	Marine drugs	Marine Drugs	Marine Drugs	MAR DRUGS	16603397	16603397	1	1	1	1	1	1	1	1	1	3.978
Marmara Medical Journal				Marmara Medical Journal	Marmara Medical Journal		10191941	13099469	1	1	1	0	0	0	1	0	1
Marmara Pharmaceutical Journal				Marmara Pharmaceutical Journal	Marmara Pharmaceutical Journal		13090801	13090801	1	1	1	0	0	0	1	0	1
mBio	mBio	mBio	mBio	mBio	mBio	MBIO	21612129	21507511	1	1	1	1	1	1	1	1	1	5.621
Mediators of Inflammation	Mediators of inflammation	Mediators of Inflammation	Mediators of inflammation	Mediators of Inflammation	Mediators of Inflammation	MEDIAT INFLAMM	09629351	14661861	1	1	1	1	1	1	1	1	1	3.882
Medical Channel				Medical Channel	Medical Channel		16815491	20779135	1	1	1	0	0	0	1	0	1
Medical education online	Medical education online	Medical Education Online	Medical education online	Medical education online	Medical Education Online		10872981	10872981	1	1	1	1	1	1	1	0	1
Medical Journal of Bakirkoy				Medical Journal of Bakirkoy	Medical Journal of BakirkÃ¶y		13059319	13059327	1	1	1	0	0	0	1	0	1
Medical Journal of Chinese People's Liberation Army				Medical Journal of Chinese People's Liberation Army	Medical Journal of Chinese People's Liberation Army		05777402		1	1	1	0	0	0	1	0	1
Medical Principles and Practice	Medical principles and practice : international journal of the Kuwait University, Health Science Centre	Medical Principles and Practice	Medical principles and practice : international journal of the Kuwait University, Health Science Centre	Medical Principles and Practice	Medical Principles and Practice	MED PRIN PRACT	10117571	14230151	1	1	1	1	1	1	1	1	1	0.963
MEDICC Review	MEDICC review		MEDICC review	MEDICC Review	MEDICC Review	MEDICC REV	15557960	15273172	1	1	1	1	0	1	1	1	1	1.114
Medicina	Medicina		Medicina	Medicina (Argentina)	Medicina (Buenos Aires)	MEDICINA-BUENOS AIRE	00257680	16699106	1	1	1	1	0	1	1	1	1	0.423
Medicina Intensiva	Medicina intensiva / Sociedad Española de Medicina Intensiva y Unidades Coronarias		Medicina intensiva / Sociedad Espanola de Medicina Intensiva y Unidades Coronarias	Medicina Intensiva	Medicina Intensiva	MED INTENSIVA	02105691	15786749	1	1	1	1	0	1	1	1	0	1.323
Medicinski pregled	Medicinski pregled		Medicinski pregled	Medicinski pregled	Medicinski Pregled		00258105	18207383	1	1	1	1	0	1	1	0	1
Mediterranean Journal of Hematology and Infectious Diseases		Mediterranean Journal of Hematology and Infectious Diseases	Mediterranean journal of hematology and infectious diseases	Mediterranean Journal of Hematology and Infectious Diseases	Mediterranean Journal of Hematology and Infectious Diseases		20353006	20353006	1	1	1	0	1	1	1	0	1
Memorias do Instituto Oswaldo Cruz	Memórias do Instituto Oswaldo Cruz		Memorias do Instituto Oswaldo Cruz	Memórias do Instituto Oswaldo Cruz	MemÃ³rias do Instituto Oswaldo Cruz.	MEM I OSWALDO CRUZ	00740276	16788060	1	1	1	1	0	1	1	1	1	1.363
Mental Illness				Mental Illness	Mental Illness		20367457	20367465	1	1	1	0	0	0	1	0	1
Microbial Biotechnology	Microbial biotechnology	Microbial Biotechnology	Microbial biotechnology	Microbial Biotechnology	Microbial Biotechnology	MICROB BIOTECHNOL	17517915	17517915	1	1	1	1	1	1	1	1	1	3.214
Microbial Cell Factories	Microbial cell factories	Microbial Cell Factories	Microbial cell factories	Microbial Cell Factories	Microbial Cell Factories	MICROB CELL FACT	14752859	14752859	1	1	1	1	1	1	1	1	1	3.306
MicrobiologyOpen	MicrobiologyOpen	MicrobiologyOpen	MicrobiologyOpen	MicrobiologyOpen	MicrobiologyOpen		20458827	20458827	1	1	1	1	1	1	1	0	1
Middle East African Journal of Ophthalmology	Middle East African journal of ophthalmology	Middle East African Journal of Ophthalmology	Middle East African journal of ophthalmology	Middle East African Journal of Ophthalmology	Middle East African Journal of Ophthalmology		09749233	09751599	1	1	1	1	1	1	1	0	1
Mikologia Lekarska				Mikologia Lekarska	Medical Mycology		1232986X	20835744	1	1	1	0	0	0	1	0	1
Minnesota Medicine	Minnesota medicine		Minnesota medicine	Minnesota medicine	Minnesota Medicine		0026556X		1	1	1	1	0	1	1	0	1
MMWR. Morbidity and mortality weekly report	MMWR. Morbidity and mortality weekly report		MMWR. Morbidity and mortality weekly report	MMWR. Morbidity and mortality weekly report	MMWR : Morbidity & Mortality Weekly Report		01492195	1545861X	1	1	1	1	0	1	1	0	1
MMWR. Recommendations and reports : Morbidity and mortality weekly report. Recommendations and reports / Centers for Disease Control	MMWR. Recommendations and reports : Morbidity and mortality weekly report. Recommendations and reports / Centers for Disease Control		MMWR. Recommendations and reports : Morbidity and mortality weekly report. Recommendations and reports / Centers for Disease Control	MMWR. Recommendations and reports : Morbidity and mortality weekly report. Recommendations and reports / Centers for Disease Control	MMWR Recommendations and Reports		10575987	15458601	1	1	1	1	0	1	1	0	1
Mobile DNA		Mobile DNA	Mobile DNA	Mobile DNA	Mobile DNA		17598753	17598753	1	1	1	0	1	1	1	0	1
Molecular and Cellular Pharmacology			Molecular and cellular pharmacology	Molecular and Cellular Pharmacology	Molecular and Cellular Pharmacology		19381247	19381247	1	1	1	0	0	1	1	0	1
Molecular Autism		Molecular Autism	Molecular autism	Molecular Autism	Molecular Autism		20402392	20402392	1	1	1	0	1	1	1	0	1
Molecular Brain	Molecular brain	Molecular Brain	Molecular brain	Molecular Brain	Molecular Brain	MOL BRAIN	17566606	17566606	1	1	1	1	1	1	1	1	1	4.202
Molecular Cancer	Molecular cancer	Molecular Cancer	Molecular cancer	Molecular Cancer	Molecular Cancer	MOL CANCER	14764598	14764598	1	1	1	1	1	1	1	1	1	5.134
Molecular Cytogenetics		Molecular Cytogenetics	Molecular cytogenetics	Molecular Cytogenetics	Molecular Cytogenetics	MOL CYTOGENET	17558166	17558166	1	1	1	0	1	1	1	1	1	2.36
Molecular Medicine	Molecular medicine (Cambridge, Mass.)	Molecular Medicine	Molecular medicine (Cambridge, Mass.)	Molecular Medicine	Molecular Medicine	MOL MED	10761551	15283658	1	1	1	1	1	1	1	1	1	4.469
Molecular Neurodegeneration	Molecular neurodegeneration	Molecular Neurodegeneration	Molecular neurodegeneration	Molecular Neurodegeneration	Molecular Neurodegeneration	MOL NEURODEGENER	17501326	17501326	1	1	1	1	1	1	1	1	1	4.007
Molecular Pain	Molecular pain	Molecular Pain	Molecular pain	Molecular Pain	Molecular Pain	MOL PAIN	17448069	17448069	1	1	1	1	1	1	1	1	1	3.774
Molecular Systems Biology	Molecular systems biology	Molecular Systems Biology	Molecular systems biology	Molecular Systems Biology	Molecular Systems Biology	MOL SYST BIOL	17444292	17444292	1	1	1	1	1	1	1	1	1	11.34
Molecular Therapy - Nucleic Acids		Molecular Therapy. Nucleic Acids	Molecular therapy. Nucleic acids	Molecular Therapy - Nucleic Acids	Molecular Therapy : Nucleic Acids		21622531	21622531	1	1	1	0	1	1	1	0	1
Molecular Vision	Molecular vision	Molecular Vision	Molecular vision	Molecular Vision	Molecular Vision	MOL VIS	10900535	10900535	1	1	1	1	1	1	1	1	1	1.987
Molecules	Molecules (Basel, Switzerland)		Molecules (Basel, Switzerland)	Molecules (Basel, Switzerland)	Molecules	MOLECULES	14203049	14203049	1	1	1	1	0	1	1	1	1	2.428
MMWR. Surveillance summaries : Morbidity and mortality weekly report. Surveillance summaries / CDC	Morbidity and mortality weekly report. Surveillance summaries (Washington, D.C. : 2002)		Morbidity and mortality weekly report. Surveillance summaries (Washington, D.C. : 2002)	Morbidity and mortality weekly report. Surveillance summaries (Washington, D.C. : 2002)	MMWR CDC Surveillance Summaries		15460738	15458636	1	1	1	1	0	1	1	0	1
Multidisciplinary Respiratory Medicine		Multidisciplinary Respiratory Medicine	Multidisciplinary respiratory medicine	Multidisciplinary Respiratory Medicine	Multidisciplinary Respiratory Medicine	MULTIDISCIP RESP MED	20496958	20496958	1	1	1	0	1	1	1	1	1	0.151
Nagoya Journal of Medical Science	Nagoya journal of medical science		Nagoya journal of medical science	Nagoya journal of medical science	Nagoya Journal of Medical Science	NAGOYA J MED SCI	00277622	21863326	1	1	1	1	0	1	1	1	1	0.643
Nano Biomedicine and Engineering			Nano biomedicine and engineering	Nano Biomedicine and Engineering	Nano Biomedicine and Engineering		21505578	21505578	1	1	1	0	0	1	1	0	1
Neoplasia	Neoplasia (New York, N.Y.)	Neoplasia (New York, N.Y.)	Neoplasia (New York, N.Y.)	Neoplasia (United States)	Neoplasia : An International Journal for Oncology Research	NEOPLASIA	15228002	14765586	1	1	1	1	1	1	1	1	1	5.47
Nepalese journal of ophthalmology : a biannual peer-reviewed academic journal of the Nepal Ophthalmic Society : NEPJOPH	Nepalese journal of ophthalmology : a biannual peer-reviewed academic journal of the Nepal Ophthalmic Society : NEPJOPH		Nepalese journal of ophthalmology : a biannual peer-reviewed academic journal of the Nepal Ophthalmic Society : NEPJOPH	Nepalese journal of ophthalmology : a biannual peer-reviewed academic journal of the Nepal Ophthalmic Society : NEPJOPH	Nepalese Journal of Ophthalmology		20726805	20910320	1	1	1	1	0	1	1	0	1
Neural Development	Neural development	Neural Development	Neural development	Neural Development	Neural Development	NEURAL DEV	17498104	17498104	1	1	1	1	1	1	1	1	1	3.549
Neurobehavioral HIV Medicine			Neurobehavioral HIV medicine	Neurobehavioral HIV Medicine	Neurobehavioral HIV Medicine		11791497	11791497	1	1	1	0	0	1	1	0	1
Neurologia Medico-Chirurgica	Neurologia medico-chirurgica		Neurologia medico-chirurgica	Neurologia Medico-Chirurgica	Neurologia Medico-Chirurgica	NEUROL MED-CHIR	04708105	13498029	1	1	1	1	0	1	1	1	1	0.493
Neurology Asia				Neurology Asia	Neurology Asia	NEUROL ASIA	18236138	18236138	1	1	1	0	0	0	1	1	1	0.147
Neurology India	Neurology India		Neurology India	Neurology India	Neurology India	NEUROL INDIA	00283886	19984022	1	1	1	1	0	1	1	1	1	1.044
Neurology International		Neurology International	Neurology international	Neurology International	Neurology International		20358385	20358377	1	1	1	0	1	1	1	0	1
Neurology Research International		Neurology Research International	Neurology research international	Neurology Research International	Neurology Research International		20901852	20901860	1	1	1	0	1	1	1	0	1
Neuropsychiatria i Neuropsychologia				Neuropsychiatria i Neuropsychologia	Neuropsychiatria i Neuropsychologia		18966764	20849885	1	1	1	0	0	0	1	0	1
Neuropsychiatric Disease and Treatment		Neuropsychiatric Disease and Treatment	Neuropsychiatric disease and treatment	Neuropsychiatric Disease and Treatment	Neuropsychiatric Disease and Treatment	NEUROPSYCH DIS TREAT	11766328	11782021	1	1	1	0	1	1	1	1	1	2
Neuro-Signals	Neuro-Signals	Neuro-Signals	Neuro-Signals	NeuroSignals	Neurosignals	NEUROSIGNALS	1424862X	14248638	1	1	1	1	1	1	1	1	1	2.561
Neurosurgical Focus	Neurosurgical focus		Neurosurgical focus	Neurosurgical focus	Neurosurgical Focus	NEUROSURG FOCUS	10920684	10920684	1	1	1	1	0	1	1	1	1	2.487
New South Wales public health bulletin	New South Wales public health bulletin		New South Wales public health bulletin	New South Wales public health bulletin	New South Wales Public Health Bulletin		10347674		1	1	1	1	0	1	1	0	1
Noise and Health	Noise & health		Noise & health	Noise & health	Noise and Health	NOISE HEALTH	14631741	19984030	1	1	1	1	0	1	1	1	1	1.648
Noropsikiyatri Arsivi				Noropsikiyatri Arsivi	NÃ¶ropsikiyatri ArÅ?ivi	NOROPSIKIYATRI ARS	13000667	13000667	1	1	1	0	0	0	1	1	1	0.221
Norsk Epidemiologi			Norsk epidemiologi = Norwegian journal of epidemiology	Norsk Epidemiologi	Norsk Epidemiologi		08032491		1	1	1	0	0	1	1	0	1
North American Journal of Medical Sciences		North American Journal of Medical Sciences	North American journal of medical sciences	North American Journal of Medical Sciences	North American Journal of Medical Sciences		22501541	19472714	1	1	1	0	1	1	1	0	1
North Carolina Medical Journal	North Carolina medical journal		North Carolina medical journal	North Carolina medical journal	North Carolina Medical Journal		00292559		1	1	1	1	0	1	1	0	1
Nucleic Acids Research	Nucleic acids research	Nucleic Acids Research	Nucleic acids research	Nucleic Acids Research	Nucleic Acids Research	NUCLEIC ACIDS RES	03051048	13624962	1	1	1	1	1	1	1	1	1	8.278
Nutricion Hospitalaria	Nutrición hospitalaria		Nutricion hospitalaria	Nutrición hospitalaria	NutriciÃ³n Hospitalaria	NUTR HOSP	02121611	16995198	1	1	1	1	0	1	1	1	1	1.305
Nutrients	Nutrients	Nutrients	Nutrients	Nutrients	Nutrients	NUTRIENTS	20726643	20726643	1	1	1	1	1	1	1	1	1	2.072
Nutrition and Diabetes		Nutrition &#x0026; Diabetes	Nutrition & diabetes	Nutrition and Diabetes	Nutrition & Diabetes	NUTR DIABETES	20444052	20444052	1	1	1	0	1	1	1	1	1	0.818
Nutrition and Metabolism		Nutrition &#x0026; Metabolism	Nutrition & metabolism	Nutrition and Metabolism	Nutrition & Metabolism	NUTR METAB	17437075	17437075	1	1	1	0	1	1	1	1	1	3.156
Nutrition Journal	Nutrition journal	Nutrition Journal	Nutrition journal	Nutrition Journal	Nutrition Journal	NUTR J	14752891	14752891	1	1	1	1	1	1	1	1	1	2.648
Oman Medical Journal		Oman Medical Journal	Oman medical journal	Oman Medical Journal	Oman Medical Journal		1999768X	20705204	1	1	1	0	1	1	1	0	1
Oncology Reviews			Oncology reviews	Oncology Reviews	Oncology Reviews		19705565	19705565	1	1	1	0	0	1	1	0	1
OncoTargets and Therapy		OncoTargets and therapy	OncoTargets and therapy	OncoTargets and Therapy	OncoTargets and Therapy	ONCOTARGETS THER	11786930	11786930	1	1	1	0	1	1	1	1	1	2.073
Online Journal of Issues in Nursing	Online journal of issues in nursing		Online journal of issues in nursing	Online journal of issues in nursing	Online Journal of Issues in Nursing		10913734	10913734	1	1	1	1	0	1	1	0	1
Open Access Emergency Medicine			Open access emergency medicine : OAEM	Open Access Emergency Medicine	Open Access Emergency Medicine		11791500	11791500	1	1	1	0	0	1	1	0	1
Open Access Journal of Clinical Trials			Open access journal of clinical trials	Open Access Journal of Clinical Trials	Open Access Journal of Clinical Trials		11791519	11791519	1	1	1	0	0	1	1	0	1
Open Access Journal of Medicinal and Aromatic Plants				Open Access Journal of Medicinal and Aromatic Plants	Open Access Journal of Medicinal and Aromatic Plants		09747877	09747877	1	1	1	0	0	0	1	0	1
Open Access Rheumatology: Research and Reviews				Open Access Rheumatology: Research and Reviews	Open Access Rheumatology : Research and Reviews		1179156X	1179156X	1	1	1	0	0	0	1	0	1
Open AIDS Journal		The Open AIDS Journal	The open AIDS journal	Open AIDS Journal	Open AIDS Journal		18746136	18746136	1	1	1	0	1	1	1	0	1
Open Allergy Journal			The open allergy journal	Open Allergy Journal	Open Allergy Journal		18748384	18748384	1	1	1	0	0	1	1	0	1
Open Anesthesiology Journal				Open Anesthesiology Journal	Open Anesthesiology Journal		18743218	18743218	1	1	1	0	0	0	1	0	1
Open Biochemistry Journal		The Open Biochemistry Journal	The open biochemistry journal	Open Biochemistry Journal	Open Biochemistry Journal		1874091X	1874091X	1	1	1	0	1	1	1	0	1
Open Bioinformatics Journal			The open bioinformatics journal	Open Bioinformatics Journal	Open Bioinformatics Journal		18750362	18750362	1	1	1	0	0	1	1	0	1
Open Biology	Open biology	Open Biology	Open biology	Open biology	Open Biology	OPEN BIOL	20462441	20462441	1	1	1	1	1	1	1	1	1	3.625
Open Biomedical Engineering Journal		The Open Biomedical Engineering Journal	The open biomedical engineering journal	Open Biomedical Engineering Journal	Open Biomedical Engineering Journal		18741207	18741207	1	1	1	0	1	1	1	0	1
Open Breast Cancer Journal				Open Breast Cancer Journal	Open Breast Cancer Journal		18768172	18768172	1	1	1	0	0	0	1	0	1
Open Cardiovascular Medicine Journal		The Open Cardiovascular Medicine Journal	The open cardiovascular medicine journal	Open Cardiovascular Medicine Journal	Open Cardiovascular Medicine Journal		18741924	18741924	1	1	1	0	1	1	1	0	1
Open Clinical Chemistry Journal				Open Clinical Chemistry Journal	Open Clinical Chemistry Journal		18742416	18742416	1	1	1	0	0	0	1	0	1
Open Dermatology Journal			The open dermatology journal	Open Dermatology Journal	Open Dermatology Journal		18743722	18743722	1	1	1	0	0	1	1	0	1
Open Diabetes Journal			The open diabetes journal	Open Diabetes Journal	Open Diabetes Journal		18765246	18765246	1	1	1	0	0	1	1	0	1
Open Immunology Journal			The open immunology journal	Open Immunology Journal	Open Immunology Journal		18742262	18742262	1	1	1	0	0	1	1	0	1
Open Infectious Diseases Journal			The open infectious diseases journal	Open Infectious Diseases Journal	Open Infectious Diseases Journal		18742793	18742793	1	1	1	0	0	1	1	0	1
Open Longevity Science			Open Longevity Science	Open Longevity Science	Open Longevity Science		1876326X	1876326X	1	1	1	0	0	1	1	0	1
Open Medical Devices Journal				Open Medical Devices Journal	Open Medical Devices Journal		18751814	18751814	1	1	1	0	0	0	1	0	1
Open Medical Imaging Journal			The open medical imaging journal	Open Medical Imaging Journal	Open Medical Imaging Journal		18743471	18743471	1	1	1	0	0	1	1	0	1
Open Medicine	Open medicine : a peer-reviewed, independent, open-access journal	Open Medicine	Open medicine : a peer-reviewed, independent, open-access journal	Open medicine : a peer-reviewed, independent, open-access journal	Open Medicine		19112092	19112092	1	1	1	1	1	1	1	0	1
Open Microbiology Journal		The Open Microbiology Journal	The open microbiology journal	Open Microbiology Journal	Open Microbiology Journal		18742858	18742858	1	1	1	0	1	1	1	0	1
Open Neurology Journal		The Open Neurology Journal	The open neurology journal	Open Neurology Journal	Open Neurology Journal		1874205X	1874205X	1	1	1	0	1	1	1	0	1
Open Obesity Journal			The open obesity journal	Open Obesity Journal	Open Obesity Journal		18768237	18768237	1	1	1	0	0	1	1	0	1
Open Ophthalmology Journal		The Open Ophthalmology Journal	The open ophthalmology journal	Open Ophthalmology Journal	Open Ophthalmology Journal		18743641	18743641	1	1	1	0	1	1	1	0	1
Open Pain Journal			The open pain journal	Open Pain Journal	Open Pain Journal		18763863	18763863	1	1	1	0	0	1	1	0	1
Open Pharmacology Journal			The open pharmacology journal	Open Pharmacology Journal	Open Pharmacology Journal		18741436	18741436	1	1	1	0	0	1	1	0	1
Open Public Health Journal			The open public health journal	Open Public Health Journal	Open Public Health Journal		18749445	18749445	1	1	1	0	0	1	1	0	1
Open Respiratory Medicine Journal		The Open Respiratory Medicine Journal	The open respiratory medicine journal	Open Respiratory Medicine Journal	Open Respiratory Medicine Journal		18743064	18743064	1	1	1	0	1	1	1	0	1
Open Rheumatology Journal		The Open Rheumatology Journal	The open rheumatology journal	Open Rheumatology Journal	Open Rheumatology Journal		18743129	18743129	1	1	1	0	1	1	1	0	1
Open Spine Journal				Open Spine Journal	Open Spine Journal		18765327	18765327	1	1	1	0	0	0	1	0	1
Open Tissue Engineering and Regenerative Medicine Journal			The open tissue engineering and regenerative medicine journal	Open Tissue Engineering and Regenerative Medicine Journal	Open Tissue Engineering and Regenerative Medicine Journal		18750435	18750435	1	1	1	0	0	1	1	0	1
Open Urology and Nephrology Journal			The open urology & nephrology journal	Open Urology and Nephrology Journal	Open Urology & Nephrology Journal		1874303X	1874303X	1	1	1	0	0	1	1	0	1
Open Women's Health Journal			The open women's health journal	Open Women's Health Journal	Open Women's Health Journal		18742912	18742912	1	1	1	0	0	1	1	0	1
Optics Express	Optics express	Optics Express	Optics express	Optics express	Optics Express	OPT EXPRESS	10944087	10944087	1	1	1	1	1	1	1	1	1	3.546
Orphanet Journal of Rare Diseases	Orphanet journal of rare diseases	Orphanet Journal of Rare Diseases	Orphanet journal of rare diseases	Orphanet Journal of Rare Diseases	Orphanet Journal of Rare Diseases	ORPHANET J RARE DIS	17501172	17501172	1	1	1	1	1	1	1	1	1	4.315
Oxidative Medicine and Cellular Longevity	Oxidative medicine and cellular longevity	Oxidative Medicine and Cellular Longevity	Oxidative medicine and cellular longevity	Oxidative Medicine and Cellular Longevity	Oxidative Medicine and Cellular Longevity	OXID MED CELL LONGEV	19420900	19420994	1	1	1	1	1	1	1	1	1	3.393
Pain Physician	Pain physician		Pain physician	Pain Physician	Pain Physician		15333159	21501149	1	1	1	1	0	1	1	0	1
Pakistan Journal of Biological Sciences	Pakistan journal of biological sciences: PJBS		Pakistan journal of biological sciences: PJBS	Pakistan journal of biological sciences: PJBS	Pakistan Journal of Biological Sciences		10288880	18125735	1	1	1	1	0	1	1	0	1
Pakistan Journal of Medical Sciences		Pakistan Journal of Medical Sciences	Pakistan journal of medical sciences	Pakistan Journal of Medical Sciences	Pakistan Journal of Medical Sciences Online	PAK J MED SCI	1682024X	1681715X	1	1	1	0	1	1	1	1	1	0.101
Pakistan Journal of Nutrition				Pakistan Journal of Nutrition	Pakistan Journal of Nutrition		16805194	19947984	1	1	1	0	0	0	1	0	1
Pan African Medical Journal	The Pan African medical journal	The Pan African Medical Journal	The Pan African medical journal	Pan African Medical Journal	Pan African Medical Journal		19378688	19378688	1	1	1	1	1	1	1	0	1
Parasites and Vectors	Parasites & vectors	Parasites &#x0026; Vectors	Parasites & vectors	Parasites and Vectors	Parasites & Vectors	PARASITE VECTOR	17563305	17563305	1	1	1	1	1	1	1	1	1	3.246
Parkinson's Disease		Parkinson's Disease	Parkinson's disease	Parkinson's Disease	Parkinson's Disease		20908083	20908083	1	1	1	0	1	1	1	0	1
Particle and Fibre Toxicology	Particle and fibre toxicology	Particle and Fibre Toxicology	Particle and fibre toxicology	Particle and Fibre Toxicology	Particle and Fibre Toxicology	PART FIBRE TOXICOL	17438977	17438977	1	1	1	1	1	1	1	1	1	9.178
Patient Preference and Adherence		Patient preference and adherence	Patient preference and adherence	Patient Preference and Adherence	Patient Preference and Adherence	PATIENT PREFER ADHER	1177889X	1177889X	1	1	1	0	1	1	1	1	1	1.333
Patient Safety in Surgery		Patient Safety in Surgery	Patient safety in surgery	Patient Safety in Surgery	Patient Safety in Surgery		17549493	17549493	1	1	1	0	1	1	1	0	1
Pediatria Wspolczesna				Pediatria Wspolczesna	Pediatria WspÃ³Å?czesna		15075532	20838425	1	1	1	0	0	0	1	0	1
Pediatric Reports		Pediatric Reports	Pediatric reports	Pediatric Reports	Pediatric Reports		2036749X	20367503	1	1	1	0	1	1	1	0	1
Pediatric Rheumatology		Pediatric Rheumatology Online Journal	Pediatric rheumatology online journal	Pediatric Rheumatology	Pediatric Rheumatology	PEDIATR RHEUMATOL	15460096	15460096	1	1	1	0	1	1	1	1	1	1.469
PeerJ		PeerJ	PeerJ	PeerJ	PeerJ		21678359	21678359	1	1	1	0	1	1	1	0	1
Pharma Research				Pharma Research	Pharma Research		09758216	09758216	1	1	1	0	0	0	1	0	1
Pharmaceuticals		Pharmaceuticals	Pharmaceuticals (Basel, Switzerland)	Pharmaceuticals	Pharmaceuticals		14248247	14248247	1	1	1	0	1	1	1	0	1
Pharmaceutics		Pharmaceutics	Pharmaceutics	Pharmaceutics	Pharmaceutics		19994923	19994923	1	1	1	0	1	1	1	0	1
Pharmacognosy Magazine		Pharmacognosy Magazine	Pharmacognosy magazine	Pharmacognosy Magazine	Pharmacognosy Magazine	PHARMACOGN MAG	09731296	09764062	1	1	1	0	1	1	1	1	1	1.525
Pharmacognosy Research		Pharmacognosy Research	Pharmacognosy research	Pharmacognosy Research	Pharmacognosy Research		09764836	09748490	1	1	1	0	1	1	1	0	1
Pharmacognosy Reviews		Pharmacognosy Reviews	Pharmacognosy reviews	Pharmacognosy Reviews	Pharmacognosy Reviews		09737847	09762787	1	1	1	0	1	1	1	0	1
Pharmacological Reports	Pharmacological reports : PR		Pharmacological reports : PR	Pharmacological Reports	Pharmacological Reports	PHARMACOL REP	17341140	17341140	1	1	1	1	0	1	1	1	1	1.965
Pharmacologyonline				Pharmacologyonline	Pharmacologyonline		18278620	18278620	1	1	1	0	0	0	1	0	1
Pharmacy Practice		Pharmacy Practice	Pharmacy practice	Pharmacy Practice	Pharmacy Practice		1885642X	18863655	1	1	1	0	1	1	1	0	1
Physiological Research	Physiological research / Academia Scientiarum Bohemoslovaca		Physiological research / Academia Scientiarum Bohemoslovaca	Physiological research / Academia Scientiarum Bohemoslovaca	Physiological Research	PHYSIOL RES	08628408	18029973	1	1	1	1	0	1	1	1	1	1.531
Physiology and Pharmacology				Physiology and Pharmacology	Physiology and Pharmacology		17350581		1	1	1	0	0	0	1	0	0
PLoS Biology	PLoS biology	PLoS Biology	PLoS biology	PLoS Biology	PLoS Biology	PLOS BIOL	15449173	15457885	1	1	1	1	1	1	1	1	1	12.69
PLoS Computational Biology	PLoS computational biology	PLoS Computational Biology	PLoS computational biology	PLoS Computational Biology	PLoS Computational Biology	PLOS COMPUT BIOL	1553734X	15537358	1	1	1	1	1	1	1	1	1	4.867
PLoS Genetics	PLoS genetics	PLoS Genetics	PLoS genetics	PLoS Genetics	PLoS Genetics	PLOS GENET	15537390	15537404	1	1	1	1	1	1	1	1	1	8.517
PLoS Neglected Tropical Diseases	PLoS neglected tropical diseases	PLoS Neglected Tropical Diseases	PLoS neglected tropical diseases	PLoS Neglected Tropical Diseases	PLoS Neglected Tropical Diseases	PLOS NEGLECT TROP D	19352727	19352735	1	1	1	1	1	1	1	1	1	4.569
PLoS ONE	PloS one	PLoS ONE	PloS one	PLoS ONE	PLoS ONE	PLOS ONE	19326203	19326203	1	1	1	1	1	1	1	1	1	3.73
PLoS Pathogens	PLoS pathogens	PLoS Pathogens	PLoS pathogens	PLoS Pathogens	PLoS Pathogens	PLOS PATHOG	15537366	15537374	1	1	1	1	1	1	1	1	1	8.136
Pneumon				Pneumon	Pneumon		1105848X	17914914	1	1	1	0	0	0	1	0	1
Polski Przeglad Chirurgiczny	Polski przeglad chirurgiczny		Polski przeglad chirurgiczny	Polski przeglad chirurgiczny	Polish Journal of Surgery		0032373X		1	1	1	1	0	1	1	0	1
Polski Przeglad Kardiologiczny				Polski Przeglad Kardiologiczny	Polish Journal of Cardiology		15075540	20838409	1	1	1	0	0	0	1	0	1
Polskie Archiwum Medycyny Wewnetrznej	Polskie Archiwum Medycyny Wewn?trznej		Polskie Archiwum Medycyny Wewnetrznej	Polskie Archiwum Medycyny Wewnetrznej	Polish Archives of Internal Medicine	POL ARCH MED WEWN	00323772	18979483	1	1	1	1	0	1	1	1	1	1.833
Population Health Metrics		Population Health Metrics	Population health metrics	Population Health Metrics	Population Health Metrics	POPUL HEALTH METR	14787954	14787954	1	1	1	0	1	1	1	1	1	2.835
Postepy w Kardiologii Interwencyjnej		Post&#x00119;py w Kardiologii Interwencyjnej = Advances in Interventional Cardiology	Postepy w kardiologii interwencyjnej = Advances in interventional cardiology	Postepy w Kardiologii Interwencyjnej	Advances in Interventional Cardiology	POSTEP KARDIOL INTER	17349338	18974295	1	1	1	0	1	1	1	1	1	0.162
PPAR Research		PPAR Research	PPAR research	PPAR Research	PPAR Research	PPAR RES	16874757	16874765	1	1	1	0	1	1	1	1	1	2.685
Pravara Medical Review				Pravara Medical Review	Pravara Medical Review		09750533	09760164	1	1	1	0	0	0	1	0	1
Preventing chronic disease	Preventing chronic disease	Preventing Chronic Disease	Preventing chronic disease	Preventing chronic disease	Preventing Chronic Disease	PREV CHRONIC DIS	15451151	15451151	1	1	1	1	1	1	1	1	1	1.585
Primary Care Respiratory Journal	Primary care respiratory journal : journal of the General Practice Airways Group		Primary care respiratory journal : journal of the General Practice Airways Group	Primary Care Respiratory Journal	Primary Care Respiratory Journal	PRIM CARE RESP J	14751534	14751534	1	1	1	1	0	1	1	1	1	2.191
Proceedings of the Japan Academy Series B: Physical and Biological Sciences	Proceedings of the Japan Academy. Series B, Physical and biological sciences	Proceedings of the Japan Academy. Series B, Physical and Biological Sciences	Proceedings of the Japan Academy. Series B, Physical and biological sciences	Proceedings of the Japan Academy. Series B, Physical and biological sciences	Proceedings of the Japan Academy, Series B Physical and Biological Sciences	P JPN ACAD B-PHYS	03862208	13492896	1	1	1	1	1	1	1	1	1	2.769
Progress in Orthodontics	Progress in orthodontics	Progress in Orthodontics	Progress in orthodontics	Progress in Orthodontics	Progress in Orthodontics		17237785	21961042	1	1	1	1	1	1	1	0	1
Proteome Science		Proteome Science	Proteome science	Proteome Science	Proteome Science	PROTEOME SCI	14775956	14775956	1	1	1	0	1	1	1	1	1	2.42
Przeglad Dermatologiczny			Przeglad dermatologiczny	Przeglad Dermatologiczny	PrzeglÄ?d Dermatologiczny		00332526	20849893	1	1	1	0	0	1	1	0	0
Przeglad Menopauzalny				Przeglad Menopauzalny	PrzeglÄ?d Menopauzalny	PRZ MENOPAUZALNY	16438876	22990038	1	1	1	0	0	0	1	1	0	0.227
Psicothema	Psicothema		Psicothema	Psicothema	Psicothema	PSICOTHEMA	02149915	1886144X	1	1	1	1	0	1	1	1	1	0.961
Psychiatria Polska	Psychiatria polska		Psychiatria polska	Psychiatria Polska	Psychiatria Polska	PSYCHIATR POL	00332674	00332674	1	1	1	1	0	1	1	1	1	1.48
Psychology and Neuroscience			Psychology & neuroscience	Psychology and Neuroscience	Psychology & Neuroscience		19843054	19833288	1	1	1	0	0	1	1	0	1
Psychoterapia				Psychoterapia	Psychoterapia		02394170		1	1	1	0	0	0	1	0	0
Public Health Reviews			Public health reviews	Public Health Reviews	Public Health Reviews		03010422	21076952	1	1	1	0	0	1	1	0	1
Pulmonary Medicine		Pulmonary Medicine	Pulmonary medicine	Pulmonary Medicine	Pulmonary Medicine		20901836	20901844	1	1	1	0	1	1	1	0	1
PVRI Review				PVRI Review	PVRI Review		09746013	09751602	1	1	1	0	0	0	1	0	1
Radiation Oncology	Radiation oncology (London, England)	Radiation Oncology (London, England)	Radiation oncology (London, England)	Radiation Oncology	Radiation Oncology	RADIAT ONCOL	1748717X	1748717X	1	1	1	1	1	1	1	1	1	2.107
Radiology and Oncology		Radiology and Oncology	Radiology and oncology	Radiology and Oncology	Radiology and Oncology	RADIOL ONCOL	13182099	15813207	1	1	1	0	1	1	1	1	1	1.602
Rare Tumors		Rare Tumors	Rare tumors	Rare Tumors	Rare Tumors		20363605	20363613	1	1	1	0	1	1	1	0	1
Records of Natural Products				Records of Natural Products	Records of Natural Products	REC NAT PROD	13076167	13076167	1	1	1	0	0	0	1	1	1	1.56
Redox Biology		Redox Biology	Redox biology	Redox Biology	Redox Biology		22132317	22132317	1	1	1	0	1	1	1	0	1
Weekly epidemiological record. Releve epidemiologique hebdomadaire. World Health Organization	Relevé épidémiologique hebdomadaire / Section d'hygiène du Secrétariat de la Société des Nations = Weekly epidemiological record / Health Section of the Secretariat of the League of Nations		Releve epidemiologique hebdomadaire / Section d'hygiene du Secretariat de la Societe des Nations = Weekly epidemiological record / Health Section of the Secretariat of the League of Nations	Relevé épidémiologique hebdomadaire / Section d'hygiène du Secrétariat de la Société des Nations = Weekly epidemiological record / Health Section of the Secretariat of the League of Nations	Weekly Epidemiological Record		00498114		1	1	1	1	0	1	1	0	1
Reports in Medical Imaging				Reports in Medical Imaging	Reports in Medical Imaging		11791586	11791586	1	1	1	0	0	0	1	0	1
Reproductive Biology and Endocrinology	Reproductive biology and endocrinology : RB&E	Reproductive Biology and Endocrinology : RB&#x0026;E	Reproductive biology and endocrinology : RB&E	Reproductive Biology and Endocrinology	Reproductive Biology and Endocrinology	REPROD BIOL ENDOCRIN	14777827	14777827	1	1	1	1	1	1	1	1	1	2.144
Reproductive Health	Reproductive health	Reproductive Health	Reproductive health	Reproductive Health	Reproductive Health	REPROD HEALTH	17424755	17424755	1	1	1	1	1	1	1	1	1	1.31
Research and Reports in Urology		Research and Reports in Urology	Research and reports in urology	Research and Reports in Urology	Research and Reports in Urology		22532447	22532447	1	1	1	0	1	1	1	0	1
Research in Pharmaceutical Sciences		Research in Pharmaceutical Sciences	Research in pharmaceutical sciences	Research in Pharmaceutical Sciences	Research in Pharmaceutical Sciences		17355362	17359414	1	1	1	0	1	1	1	0	1
Respiratory Research	Respiratory research	Respiratory Research	Respiratory research	Respiratory Research	Respiratory Research	RESP RES	14659921	1465993X	1	1	1	1	1	1	1	1	1	3.642
Retrovirology	Retrovirology	Retrovirology	Retrovirology	Retrovirology	Retrovirology	RETROVIROLOGY	17424690	17424690	1	1	1	1	1	1	1	1	1	5.657
Reumatismo	Reumatismo		Reumatismo	Reumatismo	Reumatismo		00487449	22402683	1	1	1	1	0	1	1	0	1
Rheumatologia			Reumatologia	Reumatologia	Reumatologia		00346233	20849834	1	1	1	0	0	1	1	0	1
Revista Argentina de Cardiologia			Revista argentina de cardiologia	Revista Argentina de Cardiologia	Revista Argentina de CardiologÃ­a		00347000	18503748	1	1	1	0	0	1	1	0	1
Revista Argentina de Dermatologia				Revista Argentina de Dermatologia	Revista Argentina de DermatologÃ­a		03252787	1851300X	1	1	1	0	0	0	1	0	0
Revista Brasileira de Anestesiologia			Revista brasileira de anestesiologia	Revista Brasileira de Anestesiologia	Revista Brasileira de Anestesiologia	REV BRAS ANESTESIOL	00347094	1806907X	1	1	1	0	0	1	1	1	1	0.428
Brazilian Journal of Cardiovascular Surgery	Revista brasileira de cirurgia cardiovascular : órgão oficial da Sociedade Brasileira de Cirurgia Cardiovascular		Revista brasileira de cirurgia cardiovascular : orgao oficial da Sociedade Brasileira de Cirurgia Cardiovascular	Revista brasileira de cirurgia cardiovascular : órgão oficial da Sociedade Brasileira de Cirurgia Cardiovascular	Revista Brasileira de Cirurgia Cardiovascular	REV BRAS CIR CARDIOV	01027638	16789741	1	1	1	1	0	1	1	1	0	0.809
Revista brasileira de enfermagem	Revista brasileira de enfermagem		Revista brasileira de enfermagem	Revista brasileira de enfermagem	Revista Brasileira de Enfermagem		00347167	19840446	1	1	1	1	0	1	1	0	0
Revista Brasileira de Epidemiologia	Revista brasileira de epidemiologia = Brazilian journal of epidemiology		Revista brasileira de epidemiologia = Brazilian journal of epidemiology	Revista brasileira de epidemiologia = Brazilian journal of epidemiology	Revista Brasileira de Epidemiologia		1415790X	19805497	1	1	1	1	0	1	1	0	1
Revista brasileira de ginecologia e obstetricía : revista da Federação Brasileira das Sociedades de Ginecologia e Obstetrícia	Revista brasileira de ginecologia e obstetrícia : revista da Federação Brasileira das Sociedades de Ginecologia e Obstetrícia		Revista brasileira de ginecologia e obstetricia : revista da Federacao Brasileira das Sociedades de Ginecologia e Obstetricia	Revista brasileira de ginecologia e obstetrícia : revista da Federação Brasileira das Sociedades de Ginecologia e Obstetrícia	Revista Brasileira de Ginecologia e ObstetrÃ­cia		01007203	18069339	1	1	1	1	0	1	1	0	0
Revista brasileira de parasitologia veterinaria = Brazilian journal of veterinary parasitology : Orgao Oficial do Colegio Brasileiro de Parasitologia Veterinaria.	Revista brasileira de parasitologia veterinária = Brazilian journal of veterinary parasitology : Órgão Oficial do Colégio Brasileiro de Parasitologia Veterinária		Revista brasileira de parasitologia veterinaria = Brazilian journal of veterinary parasitology : Orgao Oficial do Colegio Brasileiro de Parasitologia Veterinaria	Revista brasileira de parasitologia veterinária = Brazilian journal of veterinary parasitology : Órgão Oficial do Colégio Brasileiro de Parasitologia Veterinária	Revista Brasileira de Parasitologia VeterinÃ¡ria	REV BRAS PARASITOL V	0103846X	19842961	1	1	1	1	0	1	1	1	1	0.722
Revista Brasileira de Plantas Medicinais				Revista Brasileira de Plantas Medicinais	Revista Brasileira de Plantas Medicinais		15160572	1983084X	1	1	1	0	0	0	1	0	1
Revista Brasileira de Psiquiatria	Revista brasileira de psiquiatria (São Paulo, Brazil : 1999)		Revista brasileira de psiquiatria (Sao Paulo, Brazil : 1999)	Revista Brasileira de Psiquiatria	Revista Brasileira de Psiquiatria	REV BRAS PSIQUIATR	15164446	1809452X	1	1	1	1	0	1	1	1	1	1.856
Revista Brasileira de Reumatologia	Revista brasileira de reumatologia		Revista brasileira de reumatologia	Revista Brasileira de Reumatologia	Revista Brasileira de Reumatologia	REV BRAS REUMATOL	04825004	18094570	1	1	1	1	0	1	1	1	1	0.864
Revista chilena de infectologia : organo oficial de la SociedadChilena de Infectologia.	Revista chilena de infectología : órgano oficial de la Sociedad Chilena de Infectología		Revista chilena de infectologia : organo oficial de la Sociedad Chilena de Infectologia	Revista chilena de infectología : órgano oficial de la Sociedad Chilena de Infectología	Revista Chilena de InfectologÃ­a	REV CHIL INFECTOL	07161018	07176341	1	1	1	1	0	1	1	1	0	0.452
Revista Chilena de Pediatria			Revista chilena de pediatria	Revista Chilena de Pediatria	Revista Chilena de PediatrÃ­a		03704106	07176228	1	1	1	0	0	1	1	0	0
Revista Colombiana de Cardiologia				Revista Colombiana de Cardiologia	Revista Colombiana de CardiologÃ­a		01205633		1	1	1	0	0	0	1	0	0
Revista Cubana de Farmacia				Revista Cubana de Farmacia	Revista Cubana de Farmacia		00347515	15612988	1	1	1	0	0	0	1	0	1
Revista Cubana de Hematologia, Inmunologia y Hemoterapia				Revista Cubana de Hematologia, Inmunologia y Hemoterapia	Revista Cubana de HematologÃ­a, InmunologÃ­a y Hemoterapia		08640289	15612996	1	1	1	0	0	0	1	0	0
Revista Cubana de Medicina Tropical	Revista cubana de medicina tropical		Revista cubana de medicina tropical	Revista cubana de medicina tropical	Revista Cubana de Medicina Tropical		03750760	15613054	1	1	1	1	0	1	1	0	0
Revista da Associacao Medica Brasileira	Revista da Associação Médica Brasileira (1992)		Revista da Associacao Medica Brasileira (1992)	Revista da Associacao Medica Brasileira	Revista da AssociaÃ§Ã£o MÃ©dica Brasileira		01044230	18069282	1	1	1	1	0	1	1	0	1
Revista da Escola de Enfermagem da U S P	Revista da Escola de Enfermagem da U S P		Revista da Escola de Enfermagem da U S P	Revista da Escola de Enfermagem da U S P	Revista da Escola de Enfermagem da USP	REV ESC ENFERM USP	00806234	1980220X	1	1	1	1	0	1	1	1	1	0.387
Revista de Biologia Tropical	Revista de biología tropical		Revista de biologia tropical	Revista de biología tropical	Revista de BiologÃ­a Tropical	REV BIOL TROP	00347744	22152075	1	1	1	1	0	1	1	1	1	0.553
Revista de Ciencias Farmaceuticas Basica e Aplicada				Revista de Ciencias Farmaceuticas Basica e Aplicada	Revista de CiÃªncias FarmacÃªuticas BÃ¡sica e Aplicada		18084532	2179443X	1	1	1	0	0	0	1	0	1
Revista de gastroenterologia del Peru : organo oficial de la Sociedad de Gastroenterologia del Peru	Revista de gastroenterología del Perú : órgano oficial de la Sociedad de Gastroenterología del Perú		Revista de gastroenterologia del Peru : organo oficial de la Sociedad de Gastroenterologia del Peru	Revista de gastroenterología del Perú : órgano oficial de la Sociedad de Gastroenterología del Perú	Revista de Gastroenterologia del Peru		10225129	1609722X	1	1	1	1	0	1	1	0	0
Revista de la Sociedad Espanola del Dolor				Revista de la Sociedad Espanola del Dolor	Revista de la Sociedad EspaÃ±ola del Dolor		11348046		1	1	1	0	0	0	1	0	0
Revista de Psiquiatria Clinica				Revista de Psiquiatria Clinica	Revista de Psiquiatria ClÃ­nica	REV PSIQ CLIN-BRAZIL	01016083	1806938X	1	1	1	0	0	0	1	1	0	0.633
Revista de Salud Publica	Revista de salud pública (Bogotá, Colombia)		Revista de salud publica (Bogota, Colombia)	Revista de salud pública (Bogotá, Colombia)	Revista de Salud PÃºblica		01240064		1	1	1	1	0	1	1	0	1
Revista de Saude Publica	Revista de saúde pública		Revista de saude publica	Revista de saúde pública	Revista de SaÃºde PÃºblica	REV SAUDE PUBL	00348910	15188787	1	1	1	1	0	1	1	1	1	1.066
Revista de Toxicologia				Revista de Toxicologia	Revista de ToxicologÃ­a		02127113	16970748	1	1	1	0	0	0	1	0	0
Revista do Colegio Brasileiro de Cirurgioes	Revista do Colégio Brasileiro de Cirurgiões		Revista do Colegio Brasileiro de Cirurgioes	Revista do Colégio Brasileiro de Cirurgiões	Revista do ColÃ©gio Brasileiro de CirurgiÃµes		01006991	18094546	1	1	1	1	0	1	1	0	1
Revista do Instituto de Medicina Tropical de Sao Paulo	Revista do Instituto de Medicina Tropical de São Paulo		Revista do Instituto de Medicina Tropical de Sao Paulo	Revista do Instituto de Medicina Tropical de Sao Paulo	Revista do Instituto de Medicina Tropical de SÃ£o Paulo	REV INST MED TROP SP	00364665	16789946	1	1	1	1	0	1	1	1	1	0.959
Revista Espanola de Cardiologia			Revista espanola de cardiologia	Revista Espanola de Cardiologia	Revista EspaÃ±ola de CardiologÃ­a	REV ESP CARDIOL	03008932	15792242	1	1	1	0	0	1	1	1	1	3.204
Revista Espanola de Enfermedades Digestivas	Revista española de enfermedades digestivas : organo oficial de la Sociedad Española de Patología Digestiva		Revista espanola de enfermedades digestivas : organo oficial de la Sociedad Espanola de Patologia Digestiva	Revista Espanola de Enfermedades Digestivas	Revista Espanola de Enfermedades Digestivas	REV ESP ENFERM DIG	11300108	11300108	1	1	1	1	0	1	1	1	1	1.652
Revista Espanola de Salud Publica	Revista española de salud pública		Revista espanola de salud publica	Revista española de salud pública	Revista EspaÃ±ola de Salud PÃºblica	REV ESP SALUD PUBLIC	11355727	11355727	1	1	1	1	0	1	1	1	0	0.696
Revista española de sanidad penitenciaria	Revista española de sanidad penitenciaria		Revista espanola de sanidad penitenciaria	Revista española de sanidad penitenciaria	Revista EspaÃ±ola de Sanidad Penitenciaria		15750620		1	1	1	1	0	1	1	0	1
Revista gaucha de enfermagem / EENFUFRGS	Revista gaúcha de enfermagem / EENFUFRGS		Revista gaucha de enfermagem / EENFUFRGS	Revista gaúcha de enfermagem / EENFUFRGS	Revista GaÃºcha de Enfermagem		01026933	19831447	1	1	1	1	0	1	1	0	0
Revista Latino-Americano de Enfermagem	Revista latino-americana de enfermagem		Revista latino-americana de enfermagem	Revista latino-americana de enfermagem	Revista Latino-Americana de Enfermagem	REV LAT-AM ENFERM	01041169	15188345	1	1	1	1	0	1	1	1	1	0.54
Revista Medica de Chile	Revista médica de Chile		Revista medica de Chile	Revista médica de Chile	Revista MÃ©dica de Chile	REV MED CHILE	00349887	07176163	1	1	1	1	0	1	1	1	1	0.36
Revista Panamericana de Salud Publica/Pan American Journal of Public Health	Revista panamericana de salud pública = Pan American journal of public health		Revista panamericana de salud publica = Pan American journal of public health	Revista panamericana de salud pública = Pan American journal of public health	Revista Panamericana de Salud PÃºblica	REV PANAM SALUD PUBL	10204989	16805348	1	1	1	1	0	1	1	1	1	0.619
Revista Peruana de Medicina Experimental y Salud Publica	Revista peruana de medicina experimental y salud pública		Revista peruana de medicina experimental y salud publica	Revista Peruana de Medicina de Experimental y Salud Publica	Revista Peruana de Medicina Experimental y Salud Publica		17264634	17264642	1	1	1	1	0	1	1	0	1
Rheumatology Reports				Rheumatology Reports	Rheumatology Reports		20367511	2036752X	1	1	1	0	0	0	1	0	1
Risk Management and Healthcare Policy		Risk Management and Healthcare Policy	Risk management and healthcare policy	Risk Management and Healthcare Policy	Risk Management and Healthcare Policy		11791594	11791594	1	1	1	0	1	1	1	0	1
Rural and Remote Health	Rural and remote health		Rural and remote health	Rural and remote health	Rural and Remote Health	RURAL REMOTE HEALTH	14456354	14456354	1	1	1	1	0	1	1	1	1	0.82
Sahara J	SAHARA J : journal of Social Aspects of HIV/AIDS Research Alliance / SAHARA , Human Sciences Research Council		SAHARA J : journal of Social Aspects of HIV/AIDS Research Alliance / SAHARA , Human Sciences Research Council	SAHARA J : journal of Social Aspects of HIV/AIDS Research Alliance / SAHARA , Human Sciences Research Council	Journal of Social Aspects of HIV/AIDS	SAHARA J-J SOC ASP H	17290376	18134424	1	1	1	1	0	1	1	1	1	0.283
SAJCH South African Journal of Child Health			SAJCH : the South African journal of child health	SAJCH South African Journal of Child Health	South African Journal of Child Health		19943032	19997671	1	1	1	0	0	1	1	0	1
Salud Colectiva	Salud colectiva		Salud colectiva	Salud colectiva	Salud Colectiva	SALUD COLECT	16692381	18518265	1	1	1	1	0	1	1	1	0	0.209
Salud Publica de Mexico	Salud pública de México		Salud publica de Mexico	Salud pública de México	Salud PÃºblica de Mexico	SALUD PUBLICA MEXICO	00363634	16067916	1	1	1	1	0	1	1	1	1	0.971
Salus				Salus	Salus Online		13167138		1	1	1	0	0	0	1	0	0
Sante Publique	Santé publique (Vandoeuvre-lès-Nancy, France)		Sante publique (Vandoeuvre-les-Nancy, France)	Santé publique (Vandoeuvre-lès-Nancy, France)	SantÃ© Publique	SANTE PUBLIQUE	09953914	21043841	1	1	1	1	0	1	1	1	0	0.239
Sarcoma		Sarcoma	Sarcoma	Sarcoma	Sarcoma		1357714X	13691643	1	1	1	0	1	1	1	0	1
Saudi Dental Journal		The Saudi Dental Journal	The Saudi dental journal	Saudi Dental Journal	Saudi Dental Journal		10139052	16583558	1	1	1	0	1	1	1	0	1
Saudi Journal of Anaesthesia		Saudi Journal of Anaesthesia	Saudi journal of anaesthesia	Saudi Journal of Anaesthesia	Saudi Journal of Anaesthesia		1658354X	09753125	1	1	1	0	1	1	1	0	1
Saudi Journal of Gastroenterology	Saudi journal of gastroenterology : official journal of the Saudi Gastroenterology Association	Saudi Journal of Gastroenterology : Official Journal of the Saudi Gastroenterology Association	Saudi journal of gastroenterology : official journal of the Saudi Gastroenterology Association	Saudi Journal of Gastroenterology	Saudi Journal of Gastroenterology		13193767	19984049	1	1	1	1	1	1	1	0	1
Saudi journal of kidney diseases and transplantation : an official publication of the Saudi Center for Organ Transplantation, Saudi Arabia.	Saudi journal of kidney diseases and transplantation : an official publication of the Saudi Center for Organ Transplantation, Saudi Arabia		Saudi journal of kidney diseases and transplantation : an official publication of the Saudi Center for Organ Transplantation, Saudi Arabia	Saudi journal of kidney diseases and transplantation : an official publication of the Saudi Center for Organ Transplantation, Saudi Arabia	Saudi Journal of Kidney Diseases and Transplantation		13192442	23203838	1	1	1	1	0	1	1	0	1
Saudi Medical Journal	Saudi medical journal		Saudi medical journal	Saudi Medical Journal	Saudi Medical Journal	SAUDI MED J	03795284	16583175	1	1	1	1	0	1	1	1	1	0.619
Scandinavian Journal of Trauma, Resuscitation and Emergency Medicine	Scandinavian journal of trauma, resuscitation and emergency medicine	Scandinavian Journal of Trauma, Resuscitation and Emergency Medicine	Scandinavian journal of trauma, resuscitation and emergency medicine	Scandinavian journal of trauma, resuscitation and emergency medicine	Scandinavian Journal of Trauma, Resuscitation and Emergency Medicine	SCAND J TRAUMA RESUS	17577241	17577241	1	1	1	1	1	1	1	1	1	1.68
Schweizer Archiv für Neurologie und Psychiatrie			Schweizer Archiv fur Neurologie und Psychiatrie (Zurich, Switzerland : 1985)	Schweizer Archiv fur Neurologie und Psychiatrie	Swiss Archives of Neurology and Psychiatry		02587661	16613686	1	1	1	0	0	1	1	0	1
Science China Life Sciences	Science China. Life sciences		Science China. Life sciences	Science China. Life sciences	Science China Life Sciences		16747305	18691889	1	1	1	1	0	1	1	0	1
Scientia Medica			Scientia medica	Scientia Medica	Scientia Medica		18065562	19806108	1	1	1	0	0	1	1	0	1
Scoliosis		Scoliosis	Scoliosis	Scoliosis	Scoliosis		17487161	17487161	1	1	1	0	1	1	1	0	1
Sensors	Sensors (Basel, Switzerland)	Sensors (Basel, Switzerland)	Sensors (Basel, Switzerland)	Sensors (Basel, Switzerland)	Sensors	SENSORS-BASEL	14248220	14243210	1	1	1	1	1	1	1	1	1	1.953
Shiraz E Medical Journal				Shiraz E Medical Journal	Shiraz E Medical Journal		17351391	17351391	1	1	1	0	0	0	1	0	1
Signa Vitae				Signa Vitae	Signa Vitae	SIGNA VITAE	13345605	1845206X	1	1	1	0	0	0	1	1	1	0.067
Silence		Silence	Silence	Silence	Silence		1758907X	1758907X	1	1	1	0	1	1	1	0	1
South African Journal of Surgery	South African journal of surgery. Suid-Afrikaanse tydskrif vir chirurgie		South African journal of surgery. Suid-Afrikaanse tydskrif vir chirurgie	South African journal of surgery. Suid-Afrikaanse tydskrif vir chirurgie	South African Journal of Surgery	S AFR J SURG	00382361	20785151	1	1	1	1	0	1	1	1	1	0.362
South African Medical Journal	South African medical journal = Suid-Afrikaanse tydskrif vir geneeskunde		South African medical journal = Suid-Afrikaanse tydskrif vir geneeskunde	South African Medical Journal	South African Medical Journal	SAMJ S AFR MED J	02569574	20785135	1	1	1	1	0	1	1	1	1	1.702
South Asian Journal of Cancer		South Asian Journal of Cancer	South Asian journal of cancer	South Asian Journal of Cancer	South Asian Journal of Cancer		2278330X	22784306	1	1	1	0	1	1	1	0	1
Sovremennye Tehnologii v Medicine				Sovremennye Tehnologii v Medicine	Sovremennye Tehnologii v Medicine		20764243		1	1	1	0	0	0	1	0	1
Sri Lankan Journal of Anaesthesiology				Sri Lankan Journal of Anaesthesiology	Sri Lankan Journal of Anaesthesiology		13918834	22791965	1	1	1	0	0	0	1	0	1
Srpski Arhiv Za Celokupno Lekarstvo	Srpski arhiv za celokupno lekarstvo		Srpski arhiv za celokupno lekarstvo	Srpski arhiv za celokupno lekarstvo	Srpski Arhiv za Celokupno Lekarstvo	SRP ARK CELOK LEK	03708179	03708179	1	1	1	1	0	1	1	1	1	0.228
Standards in Genomic Sciences		Standards in Genomic Sciences	Standards in genomic sciences	Standards in Genomic Sciences	Standards in Genomic Sciences	STAND GENOMIC SCI	19443277	19443277	1	1	1	0	1	1	1	1	1	2.007
Stem Cells and Cloning: Advances and Applications		Stem Cells and Cloning : Advances and Applications	Stem cells and cloning : advances and applications	Stem Cells and Cloning: Advances and Applications	Stem Cells and Cloning : Advances and Applications		11786957	11786957	1	1	1	0	1	1	1	0	1
Stem Cells International		Stem Cells International	Stem cells international	Stem Cells International	Stem Cells International		16879678	16879678	1	1	1	0	1	1	1	0	1
Stroke Research and Treatment		Stroke Research and Treatment	Stroke research and treatment	Stroke Research and Treatment	Stroke Research and Treatment		20908105	20420056	1	1	1	0	1	1	1	0	1
Substance Abuse: Treatment, Prevention, and Policy	Substance abuse treatment, prevention, and policy	Substance Abuse Treatment, Prevention, and Policy	Substance abuse treatment, prevention, and policy	Substance abuse treatment, prevention, and policy	Substance Abuse Treatment, Prevention, and Policy	SUBST ABUSE TREAT PR	1747597X	1747597X	1	1	1	1	1	1	1	1	1	1.561
Substance Abuse: Research and Treatment		Substance Abuse: Research and Treatment	Substance abuse : research and treatment	Substance Abuse: Research and Treatment	Substance Abuse : Research and Treatment		11782218	11782218	1	1	1	0	1	1	1	0	1
Surgical Neurology International		Surgical Neurology International	Surgical neurology international	Surgical Neurology International	Surgical Neurology International		22295097	21527806	1	1	1	0	1	1	1	0	1
Swiss Medical Weekly	Swiss medical weekly		Swiss medical weekly	Swiss Medical Weekly	Swiss Medical Weekly	SWISS MED WKLY	14247860	14243997	1	1	1	1	0	1	1	1	1	1.821
Systematic Reviews	Systematic reviews	Systematic Reviews	Systematic reviews	Systematic Reviews	Systematic Reviews		20464053	20464053	1	1	1	1	1	1	1	0	1
TAF Preventive Medicine Bulletin			Turk Silahli Kuvvetleri koruyucu hekimlik bulteni	TAF Preventive Medicine Bulletin	TAF Preventive Medicine Bulletin		1303734X		1	1	1	0	0	1	1	0	1
Tanaffos				Tanaffos	Tanaffos : Journal of Respiratory Disease, Thoracic Surgery, Intensive Care and Tuberculosis		17350344	23453729	1	1	1	0	0	0	1	0	1
Tanzania journal of health research	Tanzania journal of health research		Tanzania journal of health research	Tanzania Journal of Health Research	Tanzania Journal of Health Research		18216404		1	1	1	1	0	1	1	0	1
Tehran University Medical Journal				Tehran University Medical Journal	Tehran University Medical Journal		16831764	17357322	1	1	1	0	0	0	1	0	1
Terapia Psicologica				Terapia Psicologica	Terapia PsicolÃ³gica	TER PSICOL	07166184	07184808	1	1	1	0	0	0	1	1	1	0.854
Texas Heart Institute Journal	Texas Heart Institute journal / from the Texas Heart Institute of St. Luke's Episcopal Hospital, Texas Children's Hospital	Texas Heart Institute Journal	Texas Heart Institute journal / from the Texas Heart Institute of St. Luke's Episcopal Hospital, Texas Children's Hospital	Texas Heart Institute Journal	Texas Heart Institute Journal	TEX HEART I J	07302347	15266702	1	1	1	1	1	1	1	1	1	0.674
Angle Orthodontist	The Angle orthodontist		The Angle orthodontist	The Angle orthodontist	Angle Orthodontist	ANGLE ORTHOD	00033219	19457103	1	1	1	1	0	1	1	1	1	1.184
Future of Children	The Future of children / Center for the Future of Children, the David and Lucile Packard Foundation		The Future of children / Center for the Future of Children, the David and Lucile Packard Foundation	The Future of children / Center for the Future of Children, the David and Lucile Packard Foundation	The Future of Children	FUTURE CHILD	10548289	15501558	1	1	1	1	0	1	1	1	1	2.861
The Indian journal of chest diseases & allied sciences	The Indian journal of chest diseases & allied sciences		The Indian journal of chest diseases & allied sciences	The Indian journal of chest diseases & allied sciences	The Indian Journal of Chest Diseases and Allied Sciences		03779343		1	1	1	1	0	1	1	0	1
Journal of Reproduction and Development	The Journal of reproduction and development	The Journal of Reproduction and Development	The Journal of reproduction and development	The Journal of reproduction and development	Journal of Reproduction and Development	J REPROD DEVELOP	09168818	13484400	1	1	1	1	1	1	1	1	1	1.755
The Journal of the Association of Physicians of India	The Journal of the Association of Physicians of India		The Journal of the Association of Physicians of India	The Journal of the Association of Physicians of India	Journal of the Association of Physicians of India		00045772		1	1	1	1	0	1	1	0	1
Journal of Veterinary Medical Science	The Journal of veterinary medical science / the Japanese Society of Veterinary Science	The Journal of Veterinary Medical Science	The Journal of veterinary medical science / the Japanese Society of Veterinary Science	The Journal of veterinary medical science / the Japanese Society of Veterinary Science	Journal of Veterinary Medical Science	J VET MED SCI	09167250	13477439	1	1	1	1	1	1	1	1	1	0.876
The Lancet Global Health			The lancet global health	The Lancet Global Health	The Lancet Global Health		2214109X	2214109X	1	1	1	0	0	1	1	0	1
Onderstepoort Journal of Veterinary Research	The Onderstepoort journal of veterinary research		The Onderstepoort journal of veterinary research	The Onderstepoort journal of veterinary research	Onderstepoort Journal of Veterinary Research	ONDERSTEPOORT J VET	00302465	22190635	1	1	1	1	0	1	1	1	1	0.545
The Permanente journal	The Permanente journal	The Permanente Journal	The Permanente journal	The Permanente journal	The Permanente Journal		15525767	15525775	1	1	1	1	1	1	1	0	1
The Scientific World Journal	TheScientificWorldJournal	The Scientific World Journal	TheScientificWorldJournal	The Scientific World Journal	The Scientific World Journal	SCI WORLD J	23566140	1537744X	1	1	1	1	1	1	1	1	1	1.73
Theoretical Biology and Medical Modelling	Theoretical biology & medical modelling	Theoretical Biology &#x0026; Medical Modelling	Theoretical biology & medical modelling	Theoretical biology & medical modelling	Theoretical Biology and Medical Modelling	THEOR BIOL MED MODEL	17424682	17424682	1	1	1	1	1	1	1	1	1	1.461
Theranostics	Theranostics	Theranostics	Theranostics	Theranostics	Theranostics	THERANOSTICS	18387640	18387640	1	1	1	1	1	1	1	1	1	7.806
Therapeutics and Clinical Risk Management		Therapeutics and Clinical Risk Management	Therapeutics and clinical risk management	Therapeutics and Clinical Risk Management	Therapeutics and Clinical Risk Management	THER CLIN RISK MANAG	11766336	1178203X	1	1	1	0	1	1	1	1	1	1.405
Thrombosis Journal		Thrombosis Journal	Thrombosis journal	Thrombosis Journal	Thrombosis Journal		14779560	14779560	1	1	1	0	1	1	1	0	1
Thyroid Research		Thyroid Research	Thyroid research	Thyroid Research	Thyroid Research		17566614	17566614	1	1	1	0	1	1	1	0	1
Tobacco Induced Diseases		Tobacco Induced Diseases	Tobacco induced diseases	Tobacco Induced Diseases	Tobacco Induced Diseases		20707266	20707266	1	1	1	0	1	1	1	0	1
Tohoku Journal of Experimental Medicine	The Tohoku journal of experimental medicine		The Tohoku journal of experimental medicine	Tohoku Journal of Experimental Medicine	Tohoku Journal of Experimental Medicine	TOHOKU J EXP MED	00408727	13493329	1	1	1	1	0	1	1	1	1	1.367
Toxins	Toxins	Toxins	Toxins	Toxins	Toxins	TOXINS	20726651	20726651	1	1	1	1	1	1	1	1	1	2.129
Translational Neurodegeneration		Translational Neurodegeneration	Translational neurodegeneration	Translational Neurodegeneration	Translational Neurodegeneration		20479158	20479158	1	1	1	0	1	1	1	0	1
Translational Psychiatry	Translational psychiatry	Translational Psychiatry	Translational psychiatry	Translational Psychiatry	Translational Psychiatry		21583188	21583188	1	1	1	1	1	1	1	0	1
Transplant Research and Risk Management				Transplant Research and Risk Management	Transplant Research and Risk Management		11791616	11791616	1	1	1	0	0	0	1	0	1
Trauma Monthly		Trauma Monthly	Trauma monthly	Trauma Monthly	Trauma Monthly		22517464	22517472	1	1	1	0	1	1	1	0	1
Trends in Psychiatry and Psychotherapy				Trends in Psychiatry and Psychotherapy	Trends in Psychiatry and Psychotherapy		22376089	22380019	1	1	1	0	0	0	1	0	1
Tropical Journal of Pharmaceutical Research				Tropical Journal of Pharmaceutical Research	Tropical Journal of Pharmaceutical Research	TROP J PHARM RES	15965996	15969827	1	1	1	0	0	0	1	1	1	0.5
Tropical Medicine and Health		Tropical Medicine and Health	Tropical medicine and health	Tropical Medicine and Health	Tropical Medicine and Health		13488945	13494147	1	1	1	0	1	1	1	0	1
Tuberkuloz ve toraks	Tüberküloz ve toraks		Tuberkuloz ve toraks	Tuberkuloz ve Toraks	Tuberculosis and Thorax		04941373		1	1	1	1	0	1	1	0	1
Tumor				Tumor	Tumor		10007431		1	1	1	0	0	0	1	0	0
Turk Geriatri Dergisi				Turk Geriatri Dergisi	Turkish Journal of Geriatrics	TURK J GERIATR	13042947	13079948	1	1	1	0	0	0	1	1	1	0.196
Turk Noroloji Dergisi			Turk noroloji dergisi = Turkish journal of neurology	Turk Noroloji Dergisi	TÃ¼rk NÃ¶roloji Dergisi		1301062X		1	1	1	0	0	1	1	0	1
Turk Onkoloji Dergisi				Turk Onkoloji Dergisi	Turkish Journal of Oncology		13007467		1	1	1	0	0	0	1	0	1
Turk Patoloji Dergisi	Türk patoloji dergisi		Turk patoloji dergisi	Turk Patoloji Dergisi/Turkish Journal of Pathology	TÃ¼rk Patoloji Dergisi		10185615	13095730	1	1	1	1	0	1	1	0	1
Turk Pediatri Arsivi				Turk Pediatri Arsivi	Turk Pediatri ArÅ?ivi	TURK PEDIATR ARSIVI	13060015	13086278	1	1	1	0	0	0	1	1	0	0.056
Turk Toraks Dergisi				Turk Toraks Dergisi	Turk Toraks Dergisi		13027808	13085387	1	1	1	0	0	0	1	0	0
Deri Hastaliklari ve Frengi Arsivi				Turkderm Deri Hastaliklari ve Frengi Arsivi	Turkderm	TURKDERM-ARCH TURK D	1019214X	1019214X	1	1	1	0	0	0	1	1	0	0.12
Turkish Journal of Biochemistry				Turkish Journal of Biochemistry	TÃ¼rk Biyokimya Dergisi	TURK J BIOCHEM	02504685	1303829X	1	1	1	0	0	0	1	1	1	0.211
Turkish Journal of Endocrinology and Metabolism				Turkish Journal of Endocrinology and Metabolism	Turkish Journal of Endocrinology and Metabolism		13012193	13089846	1	1	1	0	0	0	1	0	1
Turkish Journal of Haematology		Turkish Journal of Hematology	Turkish journal of haematology : official journal of Turkish Society of Haematology	Turkish Journal of Hematology	Turkish Journal of Hematology	TURK J HEMATOL	13007777	13085263	1	1	1	0	1	1	1	1	1	0.494
Turkish Journal of Medical Sciences				Turkish Journal of Medical Sciences	Turkish Journal of Medical Sciences	TURK J MED SCI	13000144	13036165	1	1	1	0	0	0	1	1	1	0.45
Turkiye Acil Tip Dergisi				Turkiye Acil Tip Dergisi	Turkish Journal of Emergency Medicine		13047361		1	1	1	0	0	0	1	0	1
FTR - Turkiye Fiziksel Tip ve Rehabilitasyon Dergisi				Turkiye Fiziksel Tip ve Rehabilitasyon Dergisi	TÃ¼rkiye Fiziksel Tip ve Rehabilitasyon Dergisi	TURK FIZ TIP REHAB D	13020234	13020234	1	1	1	0	0	0	1	1	1	0.104
UHOD - Uluslararasi Hematoloji-Onkoloji Dergisi				UHOD - Uluslararasi Hematoloji-Onkoloji Dergisi	International Journal of Hematology and Oncology	UHOD-ULUSLAR HEMATOL	1306133X	1306133X	1	1	1	0	0	0	1	1	1	0.347
Ui sahak	?i sahak		Ui sahak	?i sahak	Korean Journal of Medical History		1225505X	20935609	1	1	1	1	0	1	1	0	1
Ulster Medical Journal	The Ulster medical journal	The Ulster Medical Journal	The Ulster medical journal	Ulster Medical Journal	Ulster Medical Journal		00416193		1	1	1	1	1	1	1	0	1
Ulusal Travma ve Acil Cerrahi Dergisi	Ulusal travma ve acil cerrahi dergisi = Turkish journal of trauma & emergency surgery : TJTES		Ulusal travma ve acil cerrahi dergisi = Turkish journal of trauma & emergency surgery : TJTES	Ulusal Travma ve Acil Cerrahi Dergisi	Turkish Journal of Trauma and Emergency Surgery	ULUS TRAVMA ACIL CER	1306696X	13077945	1	1	1	1	0	1	1	1	1	0.342
Urogynaecologia International Journal				Urogynaecologia	Urogynaecologia International Journal		11213086	20388314	1	1	1	0	0	0	1	0	1
Urology Annals		Urology Annals	Urology annals	Urology Annals	Urology Annals		09747796	09747834	1	1	1	0	1	1	1	0	1
Urology journal	Urology journal		Urology journal	Urology journal	Urology Journal	UROL J	17351308	1735546X	1	1	1	1	0	1	1	1	1	0.559
VacciMonitor			VacciMonitor	VacciMonitor	VacciMonitor		1025028X	10250298	1	1	1	0	0	1	1	0	1
Vascular Cell		Vascular Cell	Vascular cell	Vascular Cell	Vascular Cell		2045824X	2045824X	1	1	1	0	1	1	1	0	1
Vascular Health and Risk Management	Vascular health and risk management	Vascular Health and Risk Management	Vascular health and risk management	Vascular Health and Risk Management	Vascular Health and Risk Management		11766344	11782048	1	1	1	1	1	1	1	0	1
Veterinary Research	Veterinary research	Veterinary Research	Veterinary research	Veterinary research	Veterinary Research	VET RES	09284249	12979716	1	1	1	1	1	1	1	1	1	3.426
Virology Journal	Virology journal	Virology Journal	Virology journal	Virology Journal	Virology Journal	VIROL J	1743422X	1743422X	1	1	1	1	1	1	1	1	1	2.092
Virology: Research and Treatment			Virology : research and treatment	Virology: Research and Treatment	Virology : Research and Treatment		1178122X	1178122X	1	1	1	0	0	1	1	0	1
Viruses	Viruses	Viruses	Viruses	Viruses	Viruses	VIRUSES-BASEL	19994915	19994915	1	1	1	1	1	1	1	1	1	2.509
Vitae				Vitae	Vitae	VITAE-COLUMBIA	01214004	21452660	1	1	1	0	0	0	1	1	0	0.149
Vojnosanitetski Pregled	Vojnosanitetski pregled. Military-medical and pharmaceutical review		Vojnosanitetski pregled. Military-medical and pharmaceutical review	Vojnosanitetski Pregled	Vojnosanitetski Pregled	VOJNOSANIT PREGL	00428450	00428450	1	1	1	1	0	1	1	1	1	0.21
West Indian Medical Journal	The West Indian medical journal		The West Indian medical journal	West Indian Medical Journal	West Indian Medical Journal	W INDIAN MED J	00433144	23095830	1	1	1	1	0	1	1	1	1	0.319
Western Journal of Emergency Medicine		Western Journal of Emergency Medicine	The western journal of emergency medicine	Western Journal of Emergency Medicine	Western Journal of Emergency Medicine : Integrating Emergency Care with Population Health		1936900X	19369018	1	1	1	0	1	1	1	0	1
Wideochirurgia I Inne Techniki Maloinwazyjne		Videosurgery and other Miniinvasive Techniques	Wideochirurgia i inne techniki malo inwazyjne = Videosurgery and other miniinvasive techniques / kwartalnik pod patronatem Sekcji Wideochirurgii TChP oraz Sekcji Chirurgii Bariatrycznej TChP	Wideochirurgia I Inne Techniki Maloinwazyjne	Videosurgery and Other Miniinvasive Techniques	VIDEOSURGERY MINIINV	18954588	22990054	1	1	1	0	1	1	1	1	1	0.757
Wisconsin Medical Journal	WMJ : official publication of the State Medical Society of Wisconsin		WMJ : official publication of the State Medical Society of Wisconsin	Wisconsin Medical Journal	Wisconsin Medical Journal		10981861		1	1	1	1	0	1	1	0	1
World Allergy Organization Journal		The World Allergy Organization Journal	The World Allergy Organization journal	World Allergy Organization Journal	World Allergy Organization Journal		19394551	19394551	1	1	1	0	1	1	1	0	1
World Journal of Gastroenterology	World journal of gastroenterology : WJG	World Journal of Gastroenterology : WJG	World journal of gastroenterology : WJG	World Journal of Gastroenterology	World Journal of Gastroenterology	WORLD J GASTROENTERO	10079327	22192840	1	1	1	1	1	1	1	1	1	2.547
World Journal of Surgical Oncology	World journal of surgical oncology	World Journal of Surgical Oncology	World journal of surgical oncology	World Journal of Surgical Oncology	World Journal of Surgical Oncology	WORLD J SURG ONCOL	14777819	14777819	1	1	1	1	1	1	1	1	1	1.092
Wspolczesna Onkologia		Contemporary Oncology	Contemporary oncology (Poznan, Poland)	Wspolczesna Onkologia	Contemporary Oncology	WSPOLCZESNA ONKOL	14282526	18974309	1	1	1	0	1	1	1	1	0	0.211
Yakugaku Zasshi	Yakugaku zasshi : Journal of the Pharmaceutical Society of Japan		Yakugaku zasshi : Journal of the Pharmaceutical Society of Japan	Yakugaku Zasshi	Yakugaku Zasshi	YAKUGAKU ZASSHI	00316903	13475231	1	1	1	1	0	1	1	1	1	0.46
Yale Journal of Biology and Medicine	The Yale journal of biology and medicine	The Yale Journal of Biology and Medicine	The Yale journal of biology and medicine	Yale Journal of Biology and Medicine	Yale Journal of Biology and Medicine		00440086	15514056	1	1	1	1	1	1	1	0	1
Yeni Symposium				Yeni Symposium	Yeni Symposium		13008773	13044591	1	1	1	0	0	0	1	0	1
Yonsei Medical Journal	Yonsei medical journal	Yonsei Medical Journal	Yonsei medical journal	Yonsei Medical Journal	Yonsei Medical Journal	YONSEI MED J	05135796	19762437	1	1	1	1	1	1	1	1	1	1.306
Zeitschrift für Gefassmedizin				Zeitschrift fur Gefassmedizin	Zeitschrift fÃ¼r GefÃ¤Ã?medizin		18129501	1812951X	1	1	1	0	0	0	1	0	0
International Journal of Mental Health and Addiction			International journal of mental health and addiction			INT J MENT HEALTH AD	15571874	15571882	0	0	1	0	0	1	0	1	1	0.863
Mount Sinai Journal of Medicine			The Mount Sinai journal of medicine, New York			MT SINAI J MED	00272507	19317581	0	0	1	0	0	1	0	1	1	1.986
Gaceta Medica de Caracas			Gaceta medica de Caracas				03674762		0	0	1	0	0	1	0	0	0
Open Glycoscience			Open glycoscience				18753981	18753981	0	0	1	0	0	1	0	0	1
Annual Review of Biomedical Sciences							15173011		0	0	1	0	0	0	0	0	1
Ethiopian Journal of Health Development						ETHIOP J HEALTH DEV	10216790	10216790	0	0	1	0	0	0	0	1	1	0.299
Hellenic Journal of Cardiology							10117970		0	0	1	0	0	0	0	0	1
Iran Occupational Health							17355133		0	0	1	0	0	0	0	0	0
Iranian Cardiovascular Research Journal							1735885X	17358868	0	0	1	0	0	0	0	0	1
Comparative Hepatology		Comparative Hepatology	Comparative hepatology				14765926	14765926	0	0	1	0	1	1	0	0	1
Experimental Diabetes Research		Experimental Diabetes Research	Experimental diabetes research			EXP DIABETES RES	16875214	16875303	0	0	1	0	1	1	0	1	1	1.893
International Journal of Diabetes in Developing Countries		International Journal of Diabetes in Developing Countries	International journal of diabetes in developing countries			INT J DIABETES DEV C	09733930	19983832	0	0	1	0	1	1	0	1	1	0.451
Journal of Biomedicine and Biotechnology		Journal of Biomedicine and Biotechnology	Journal of biomedicine & biotechnology			J BIOMED BIOTECHNOL	11107243	11107251	0	0	1	0	1	1	0	1	1	2.88
Actas Urologicas Espanolas	Actas urologicas españolas		Actas urologicas espanolas	Actas urologicas españolas		ACTAS UROL ESP	02104806	16997980	0	1	1	1	0	1	0	1	0	1.144
Alzheimer's Research and Therapy		Alzheimer's Research &#x0026; Therapy	Alzheimer's research & therapy	Alzheimer's Research and Therapy		ALZHEIMERS RES THER	17589193	17589193	0	1	1	0	1	1	0	1	1	4.39
American Family Physician	American family physician		American family physician	American Family Physician		AM FAM PHYSICIAN	0002838X	15320650	0	1	1	1	0	1	0	1	1	1.611
Annals of Nuclear Medicine	Annals of nuclear medicine		Annals of nuclear medicine	Annals of Nuclear Medicine		ANN NUCL MED	09147187	18646433	0	1	1	1	0	1	0	1	1	1.41
Annals of the American Thoracic Society	Annals of the American Thoracic Society	Annals of the American Thoracic Society	Annals of the American Thoracic Society	Annals of the American Thoracic Society			23296933	23256621	0	1	1	1	1	1	0	0	1
Archives of Pharmacal Research	Archives of pharmacal research		Archives of pharmacal research	Archives of Pharmacal Research		ARCH PHARM RES	02536269	19763786	0	1	1	1	0	1	0	1	1	1.538
Archivos de Medicina				Archivos de Medicina			16989465	16989465	0	1	1	0	0	0	0	0	0
Archivos Espanoles de Urologia	Archivos españoles de urología		Archivos espanoles de urologia	Archivos españoles de urología			00040614	15768260	0	1	1	1	0	1	0	0	0
BMC Blood Disorders		BMC Blood Disorders	BMC blood disorders	BMC Blood Disorders			14712326	14712326	0	1	1	0	1	1	0	0	1
BMC Chemical Biology		BMC Chemical Biology	BMC chemical biology	BMC Chemical Biology			14726769	14726769	0	1	1	0	1	1	0	0	1
British Journal of Biomedical Science	British journal of biomedical science		British journal of biomedical science	British Journal of Biomedical Science		BRIT J BIOMED SCI	09674845	09674845	0	1	1	1	0	1	0	1	1	0.833
Canadian Association of Radiologists Journal	Canadian Association of Radiologists journal = Journal l'Association canadienne des radiologistes		Canadian Association of Radiologists journal = Journal l'Association canadienne des radiologistes	Canadian Association of Radiologists Journal		CAN ASSOC RADIOL J	08465371	14882361	0	1	1	1	0	1	0	1	1	0.431
Canadian Journal of Diabetes	Canadian journal of diabetes		Canadian journal of diabetes	Canadian Journal of Diabetes		CAN J DIABETES	14992671	23523840	0	1	1	1	0	1	0	1	1	0.458
Canadian Journal of Psychiatry	Canadian journal of psychiatry. Revue canadienne de psychiatrie		Canadian journal of psychiatry. Revue canadienne de psychiatrie	Canadian Journal of Psychiatry		CAN J PSYCHIAT	07067437	14970015	0	1	1	1	0	1	0	1	1	2.483
Cellular and Molecular Biology Letters	Cellular & molecular biology letters		Cellular & molecular biology letters	Cellular and Molecular Biology Letters		CELL MOL BIOL LETT	14258153	16891392	0	1	1	1	0	1	0	1	1	1.953
Clinical and Investigative Medicine	Clinical and investigative medicine. Médecine clinique et experimentale		Clinical and investigative medicine. Medecine clinique et experimentale	Clinical and investigative medicine. Médecine clinique et experimentale		CLIN INVEST MED	0147958X	14882353	0	1	1	1	0	1	0	1	1	1.085
Clinical Microbiology and Infection	Clinical microbiology and infection : the official publication of the European Society of Clinical Microbiology and Infectious Diseases		Clinical microbiology and infection : the official publication of the European Society of Clinical Microbiology and Infectious Diseases	Clinical Microbiology and Infection		CLIN MICROBIOL INFEC	1198743X	14690691	0	1	1	1	0	1	0	1	1	4.578
Clinical Pharmacist				Clinical Pharmacist			17589061		0	1	1	0	0	0	0	0	1
Drug Invention Today				Drug Invention Today			09757619	09757619	0	1	1	0	0	0	0	0	1
East African Journal of Public Health	East African journal of public health		East African journal of public health	East African journal of public health			08568960		0	1	1	1	0	1	0	0	1
Endocrine Regulations	Endocrine regulations		Endocrine regulations	Endocrine Regulations			12100668	13360329	0	1	1	1	0	1	0	0	1
Environmental Health and Preventive Medicine	Environmental health and preventive medicine	Environmental Health and Preventive Medicine	Environmental health and preventive medicine	Environmental Health and Preventive Medicine			1342078X	13474715	0	1	1	1	1	1	0	0	1
Epidemiologic Perspectives and Innovations		Epidemiologic Perspectives &#x0026; Innovations : EP+I	Epidemiologic perspectives & innovations : EP+I	Epidemiologic Perspectives and Innovations			17425573	17425573	0	1	1	0	1	1	0	0	1
Family Practice Management	Family practice management		Family practice management	Family practice management			10695648	15311929	0	1	1	1	0	1	0	0	1
Folia Pharmacologica Japonica	Nihon yakurigaku zasshi. Folia pharmacologica Japonica		Nihon yakurigaku zasshi. Folia pharmacologica Japonica	Folia Pharmacologica Japonica			00155691	13478397	0	1	1	1	0	1	0	0	0
Genetic Vaccines and Therapy		Genetic Vaccines and Therapy	Genetic vaccines and therapy	Genetic Vaccines and Therapy			14790556	14790556	0	1	1	0	1	1	0	0	1
Genome Medicine		Genome Medicine	Genome medicine	Genome Medicine		GENOME MED	1756994X	1756994X	0	1	1	0	1	1	0	1	1	3.906
Head and Neck Oncology		Head &#x0026; Neck Oncology	Head & neck oncology	Head and Neck Oncology			17583284	17583284	0	1	1	0	1	1	0	0	1
Hypertension Research	Hypertension research : official journal of the Japanese Society of Hypertension		Hypertension research : official journal of the Japanese Society of Hypertension	Hypertension Research		HYPERTENS RES	09169636	13484214	0	1	1	1	0	1	0	1	1	2.791
In Silico Biology	In silico biology		In silico biology	In silico biology			13866338	14343207	0	1	1	1	0	1	0	0	1
Indian Journal of Clinical Biochemistry		Indian Journal of Clinical Biochemistry	Indian journal of clinical biochemistry : IJCB	Indian Journal of Clinical Biochemistry			09701915	09740422	0	1	1	0	1	1	0	0	1
Indian Journal of Gastroenterology	Indian journal of gastroenterology : official journal of the Indian Society of Gastroenterology		Indian journal of gastroenterology : official journal of the Indian Society of Gastroenterology	Indian Journal of Gastroenterology			02548860	09750711	0	1	1	1	0	1	0	0	1
Indian Journal of Pediatrics	Indian journal of pediatrics		Indian journal of pediatrics	Indian Journal of Pediatrics		INDIAN J PEDIATR	00195456	09737693	0	1	1	1	0	1	0	1	1	0.715
Investigacion Clinica	Investigación clínica		Investigacion clinica	Investigacion Clinica (Venezuela)		INVEST CLIN	05355133	05355133	0	1	1	1	0	1	0	1	0	0.394
Journal of Applied Biomedicine			Journal of applied biomedicine	Journal of Applied Biomedicine		J APPL BIOMED	1214021X	12140287	0	1	1	0	0	1	0	1	1	0.978
Journal of Applied Genetics	Journal of applied genetics		Journal of applied genetics	Journal of Applied Genetics		J APPL GENET	12341983	21903883	0	1	1	1	0	1	0	1	1	1.847
Journal of Biological Chemistry	The Journal of biological chemistry	The Journal of Biological Chemistry	The Journal of biological chemistry	Journal of Biological Chemistry		J BIOL CHEM	00219258	1083351X	0	1	1	1	1	1	0	1	1	4.651
Journal of Food and Drug Analysis	Yao wu shi pin fen xi = Journal of food and drug analysis			Journal of Food and Drug Analysis		J FOOD DRUG ANAL	10219498	10219498	0	1	1	1	0	0	0	1	1	0.333
Journal of Lipid Research	Journal of lipid research	Journal of Lipid Research	Journal of lipid research	Journal of Lipid Research		J LIPID RES	00222275	15397262	0	1	1	1	1	1	0	1	1	4.386
Journal of Young Pharmacists		Journal of Young Pharmacists : JYP	Journal of young pharmacists : JYP	Journal of Young Pharmacists			09751483	09751505	0	1	1	0	1	1	0	0	1
Macedonian Journal of Medical Sciences				Macedonian Journal of Medical Sciences			18575749	18575773	0	1	1	0	0	0	0	0	1
Medical History	Medical history	Medical History	Medical history	Medical history		MED HIST	00257273	00257273	0	1	1	1	1	1	0	1	1	0.377
Medical Journal of Australia	The Medical journal of Australia		The Medical journal of Australia	Medical Journal of Australia		MED J AUSTRALIA	0025729X	13265377	0	1	1	1	0	1	0	1	1	2.853
Microbiology and Immunology	Microbiology and immunology		Microbiology and immunology	Microbiology and Immunology		MICROBIOL IMMUNOL	03855600	13480421	0	1	1	1	0	1	0	1	1	1.545
Neurocirugia	Neurocirugía (Asturias, Spain)		Neurocirugia (Asturias, Spain)	Neurocirugia		NEUROCIRUGIA	11301473	11301473	0	1	1	1	0	1	0	1	0	0.343
Neurologia i Neurochirurgia Polska	Neurologia i neurochirurgia polska		Neurologia i neurochirurgia polska	Neurologia i Neurochirurgia Polska		NEUROL NEUROCHIR POL	00283843	18974260	0	1	1	1	0	1	0	1	0	0.486
NeuroQuantology			NeuroQuantology : an interdisciplinary journal of neuroscience and quantum physics	NeuroQuantology		NEUROQUANTOLOGY	13035150	13035150	0	1	1	0	0	1	0	1	1	0.378
New Zealand Journal of Medical Laboratory Science				New Zealand Journal of Medical Laboratory Science			11710195		0	1	1	0	0	0	0	0	1
Nonlinear Biomedical Physics		Nonlinear Biomedical Physics	Nonlinear biomedical physics	Nonlinear Biomedical Physics			17534631	17534631	0	1	1	0	1	1	0	0	1
Open Hematology Journal				Open Hematology Journal			18742769	18742769	0	1	1	0	0	0	0	0	1
Open Neuroendocrinology Journal			Open neuroendocrinology journal (Online)	Open Neuroendocrinology Journal			18765289	18765289	0	1	1	0	0	1	0	0	1
Open Neuropsychopharmacology Journal			The open neuropsychopharmacology journal	Open Neuropsychopharmacology Journal			18765238	18765238	0	1	1	0	0	1	0	0	1
Osong Public Health and Research Perspectives		Osong Public Health and Research Perspectives	Osong public health and research perspectives	Osong Public Health and Research Perspectives			22109099	22336052	0	1	1	0	1	1	0	0	1
Postgraduate Medicine	Postgraduate medicine		Postgraduate medicine	Postgraduate Medicine		POSTGRAD MED	00325481	19419260	0	1	1	1	0	1	0	1	1	1.972
Revista del Instituto Nacional de Enfermedades Respiratorias				Revista del Instituto Nacional de Enfermedades Respiratorias			01877585		0	1	1	0	0	0	0	0	0
Revista Espanola de Patologia			Revista espanola de patologia : publicacion oficial de la Sociedad Espanola de Anatomia Patologica y de la Sociedad Espanola de Citologia	Revista Espanola de Patologia			16998855	1988561X	0	1	1	0	0	1	0	0	0
Revista Venezolana de Oncologia				Revista Venezolana de Oncologia			07980582		0	1	1	0	0	0	0	0	0
Scottish Medical Journal	Scottish medical journal		Scottish medical journal	Scottish Medical Journal		SCOT MED J	00369330	20456441	0	1	1	1	0	1	0	1	1	0.286
Journal of Contemporary Dental Practice	The journal of contemporary dental practice		The journal of contemporary dental practice	The journal of contemporary dental practice			15263711	15263711	0	1	1	1	0	1	0	0	1
Translational Oncogenomics		Translational Oncogenomics	Translational oncogenomics	Translational Oncogenomics			11772727	11772727	0	1	1	0	1	1	0	0	1
AAPS Journal	The AAPS journal	The AAPS Journal	The AAPS journal	AAPS Journal		AAPS J	15507416	15507416	0	1	1	1	1	1	0	1	1	4.386
AAPS PharmSciTech	AAPS PharmSciTech	AAPS PharmSciTech	AAPS PharmSciTech	AAPS PharmSciTech		AAPS PHARMSCITECH	15309932	15221059	0	1	1	1	1	1	0	1	1	1.584
Counselling and Psychotherapy Research							14733145		0	0	1	0	0	0	0	0	0
Evolutionary Applications							17524563		0	0	1	0	0	0	0	0	0
Medicinski Glasnik							00258091		0	0	1	0	0	0	0	0	0
Mentalhigiene es Pszichoszomatika							14198126	17863759	0	0	1	0	0	0	0	0	0
Analytical Letters			Analytical letters			ANAL LETT	00032719	1532236X	0	0	1	0	0	1	0	1	0	0.965
Polymer Chemistry			Polymer chemistry			POLYM CHEM-UK	17599954	17599962	0	0	1	0	0	1	0	1	0	5.231
Acta Biomedica de l'Ateneo Parmense	Acta bio-medica : Atenei Parmensis		Acta bio-medica : Atenei Parmensis	Acta Biomedica			03924203		0	1	1	1	0	1	0	0	1
Age	Age (Dordrecht, Netherlands)	Age	Age (Dordrecht, Netherlands)	Age		AGE	01619152	15744647	0	1	1	1	1	1	0	1	1	4.084
Alternative Medicine Review	Alternative medicine review : a journal of clinical therapeutic		Alternative medicine review : a journal of clinical therapeutic	Alternative Medicine Review		ALTERN MED REV	10895159	10895159	0	1	1	1	0	1	0	1	1	4.857
American Journal of the Medical Sciences	The American journal of the medical sciences		The American journal of the medical sciences	American Journal of the Medical Sciences		AM J MED SCI	00029629	15382990	0	1	1	1	0	1	0	1	1	1.334
Clinical and Translational Oncology	Clinical & translational oncology : official publication of the Federation of Spanish Oncology Societies and of the National Cancer Institute of Mexico		Clinical & translational oncology : official publication of the Federation of Spanish Oncology Societies and of the National Cancer Institute of Mexico	Clinical and Translational Oncology		CLIN TRANSL ONCOL	1699048X	16993055	0	1	1	1	0	1	0	1	1	1.276
Clinical Case Studies			Clinical case studies	Clinical Case Studies			15346501	15523802	0	1	1	0	0	1	0	0	1
Clinical Microbiology Newsletter				Clinical Microbiology Newsletter			01964399	18734391	0	1	1	0	0	0	0	0	1
Comparative biochemistry and physiology. Part A, Molecular & integrative physiology	Comparative biochemistry and physiology. Part A, Molecular & integrative physiology		Comparative biochemistry and physiology. Part A, Molecular & integrative physiology	Comparative Biochemistry and Physiology - Part A: Molecular and Integrative Physiology		COMP BIOCHEM PHYS A	10956433	15314332	0	1	1	1	0	1	0	1	1	2.167
Current Oncology Reports	Current oncology reports		Current oncology reports	Current Oncology Reports		CURR ONCOL REP	15233790	15346269	0	1	1	1	0	1	0	1	1	3.327
Dental Traumatology	Dental traumatology : official publication of International Association for Dental Traumatology		Dental traumatology : official publication of International Association for Dental Traumatology	Dental traumatology : official publication of International Association for Dental Traumatology		DENT TRAUMATOL	16004469	16009657	0	1	1	1	0	1	0	1	1	1
Epigenomics	Epigenomics		Epigenomics	Epigenomics		EPIGENOMICS-UK	17501911	1750192X	0	1	1	1	0	1	0	1	1	2.433
Evolutionary Anthropology	Evolutionary anthropology		Evolutionary anthropology	Evolutionary anthropology		EVOL ANTHROPOL	10601538	15206505	0	1	1	1	0	1	0	1	1	3.528
General Hospital Psychiatry	General hospital psychiatry		General hospital psychiatry	General Hospital Psychiatry		GEN HOSP PSYCHIAT	01638343	18737714	0	1	1	1	0	1	0	1	1	2.977
Genes and Genomics			Genes & genomics	Genes and Genomics		GENES GENOM	19769571	20929293	0	1	1	0	0	1	0	1	1	0.497
Haemophilia	Haemophilia : the official journal of the World Federation of Hemophilia		Haemophilia : the official journal of the World Federation of Hemophilia	Haemophilia		HAEMOPHILIA	13518216	13652516	0	1	1	1	0	1	0	1	1	3.17
Hand Clinics	Hand clinics		Hand clinics	Hand Clinics		HAND CLIN	07490712	15581969	0	1	1	1	0	1	0	1	1	0.946
Acta Urologica Japonica	Hinyokika kiyo. Acta urologica Japonica		Hinyokika kiyo. Acta urologica Japonica	Hinyokika kiyo. Acta urologica Japonica			00181994		0	1	1	1	0	1	0	0	0
Hormone Research in Paediatrics	Hormone research in pædiatrics	Hormone Research in P&#x000e6;diatrics	Hormone research in paediatrics	Hormone Research in Paediatrics		HORM RES PAEDIAT	16632818	16632826	0	1	1	1	1	1	0	1	1	1.553
Huanjing Kexue/Environmental Science	Huan jing ke xue= Huanjing kexue / [bian ji, Zhongguo ke xue yuan huan jing ke xue wei yuan hui "Huan jing ke xue" bian ji wei yuan hui.]		Huan jing ke xue= Huanjing kexue / [bian ji, Zhongguo ke xue yuan huan jing ke xue wei yuan hui "Huan jing ke xue" bian ji wei yuan hui.]	Huan jing ke xue= Huanjing kexue / [bian ji, Zhongguo ke xue yuan huan jing ke xue wei yuan hui "Huan jing ke xue" bian ji wei yuan hui.]			02503301		0	1	1	1	0	1	0	0	0
International Journal of Computerized Dentistry	International journal of computerized dentistry		International journal of computerized dentistry	International journal of computerized dentistry			14634201		0	1	1	1	0	1	0	0	1
Japan Journal of Nursing Science	Japan journal of nursing science : JJNS		Japan journal of nursing science : JJNS	Japan journal of nursing science : JJNS		JPN J NURS SCI	17427932	17427924	0	1	1	1	0	1	0	1	1	0.583
Journal of Alternative and Complementary Medicine	Journal of alternative and complementary medicine (New York, N.Y.)	Journal of Alternative and Complementary Medicine	Journal of alternative and complementary medicine (New York, N.Y.)	Journal of Alternative and Complementary Medicine		J ALTERN COMPLEM MED	10755535	15577708	0	1	1	1	1	1	0	1	1	1.464
Journal of Biomolecular Structure and Dynamics	Journal of biomolecular structure & dynamics		Journal of biomolecular structure & dynamics	Journal of Biomolecular Structure and Dynamics			07391102	15380254	0	1	1	1	0	1	0	0	1
Journal of Cross-Cultural Gerontology	Journal of cross-cultural gerontology		Journal of cross-cultural gerontology	Journal of cross-cultural gerontology			01693816	15730719	0	1	1	1	0	1	0	0	1
Journal of Molecular Evolution	Journal of molecular evolution		Journal of molecular evolution	Journal of molecular evolution		J MOL EVOL	00222844	14321432	0	1	1	1	0	1	0	1	1	2.145
Journal of Toxicology and Environmental Health - Part A	Journal of toxicology and environmental health. Part A		Journal of toxicology and environmental health. Part A	Journal of Toxicology and Environmental Health - Part A: Current Issues		J TOXICOL ENV HEAL A	15287394	10872620	0	1	1	1	0	1	0	1	1	1.733
LDA journal	LDA journal		LDA journal	LDA journal			00924458		0	1	1	1	0	1	0	0	1
Measurement in Physical Education and Exercise Science			Measurement in physical education and exercise science	Measurement in Physical Education and Exercise Science			1091367X	15327841	0	1	1	0	0	1	0	0	1
Medecine et Maladies Infectieuses	Médecine et maladies infectieuses		Medecine et maladies infectieuses	Medecine et Maladies Infectieuses		MED MALADIES INFECT	0399077X	17696690	0	1	1	1	0	1	0	1	0	0.753
National Medical Journal of India	The National medical journal of India		The National medical journal of India	National Medical Journal of India		NATL MED J INDIA	0970258X	0970258X	0	1	1	1	0	1	0	1	1	0.908
Nucleus	Nucleus (Austin, Tex.)	Nucleus	Nucleus (Austin, Tex.)	Nucleus (United States)			19491034	19491042	0	1	1	1	1	1	0	0	1
Orthopaedic Nursing	Orthopaedic nursing / National Association of Orthopaedic Nurses		Orthopedic nursing / National Association of Orthopedic Nurses	Orthopaedic nursing / National Association of Orthopaedic Nurses		ORTHOP NURS	07446020	1542538X	0	1	1	1	0	1	0	1	1	0.688
Photochemical and Photobiological Sciences	Photochemical & photobiological sciences : Official journal of the European Photochemistry Association and the European Society for Photobiology		Photochemical & photobiological sciences : Official journal of the European Photochemistry Association and the European Society for Photobiology	Photochemical & photobiological sciences : Official journal of the European Photochemistry Association and the European Society for Photobiology		PHOTOCH PHOTOBIO SCI	1474905X	14749092	0	1	1	1	0	1	0	1	1	2.923
Proceedings of the Institution of Mechanical Engineers, Part H: Journal of Engineering in Medicine	Proceedings of the Institution of Mechanical Engineers. Part H, Journal of engineering in medicine		Proceedings of the Institution of Mechanical Engineers. Part H, Journal of engineering in medicine	Proceedings of the Institution of Mechanical Engineers. Part H, Journal of engineering in medicine		P I MECH ENG H	09544119	20413033	0	1	1	1	0	1	0	1	1	1.419
Psycho-Oncologie				Psycho-Oncologie		PSYCHO-ONCOLOGIE	17783798	1778381X	0	1	1	0	0	0	0	1	0	0.243
QJM - Monthly Journal of the Association of Physicians	QJM : monthly journal of the Association of Physicians	QJM: An International Journal of Medicine	QJM : monthly journal of the Association of Physicians	QJM		QJM-INT J MED	14602725	14602393	0	1	1	1	1	1	0	1	1	2.361
Reviews on Recent Clinical Trials	Reviews on recent clinical trials		Reviews on recent clinical trials	Reviews on Recent Clinical Trials			15748871	18761038	0	1	1	1	0	1	0	0	1
Romanian Journal of Morphology and Embryology	Romanian journal of morphology and embryology = Revue roumaine de morphologie et embryologie		Romanian journal of morphology and embryology = Revue roumaine de morphologie et embryologie	Romanian journal of morphology and embryology = Revue roumaine de morphologie et embryologie		ROM J MORPHOL EMBRYO	12200522	12200522	0	1	1	1	0	1	0	1	1	0.62
Rozhledy v Chirurgii	Rozhledy v chirurgii : m?sí?ník ?eskoslovenské chirurgické spole?nosti		Rozhledy v chirurgii : mesicnik Ceskoslovenske chirurgicke spolecnosti	Rozhledy v chirurgii : m?sí?ník ?eskoslovenské chirurgické spole?nosti			00359351		0	1	1	1	0	1	0	0	0
Science and Engineering Ethics	Science and engineering ethics		Science and engineering ethics	Science and engineering ethics		SCI ENG ETHICS	13533452	14715546	0	1	1	1	0	1	0	1	1	0.901
Science and Justice - Journal of the Forensic Science Society	Science & justice : journal of the Forensic Science Society		Science & justice : journal of the Forensic Science Society	Science and Justice		SCI JUSTICE	13550306	18764452	0	1	1	1	0	1	0	1	1	1.151
Stereotactic and Functional Neurosurgery	Stereotactic and functional neurosurgery	Stereotactic and Functional Neurosurgery	Stereotactic and functional neurosurgery	Stereotactic and Functional Neurosurgery		STEREOT FUNCT NEUROS	10116125	14230372	0	1	1	1	1	1	0	1	1	1.458
Stress: the International Journal on Biology of Stress	Stress (Amsterdam, Netherlands)		Stress (Amsterdam, Netherlands)	Stress		STRESS	10253890	16078888	0	1	1	1	0	1	0	1	1	3.252
American Naturalist	The American naturalist		The American naturalist	The American naturalist		AM NAT	00030147	15375323	0	1	1	1	0	1	0	1	1	4.552
The Pharos of Alpha Omega Alpha-Honor Medical Society. Alpha Omega Alpha	The Pharos of Alpha Omega Alpha-Honor Medical Society. Alpha Omega Alpha		The Pharos of Alpha Omega Alpha-Honor Medical Society. Alpha Omega Alpha	The Pharos of Alpha Omega Alpha-Honor Medical Society. Alpha Omega Alpha			00317179		0	1	1	1	0	1	0	0	1
Zhonghua lao dong wei sheng zhi ye bing za zhi = Zhonghua laodong weisheng zhiyebing zazhi = Chinese journal of industrial hygiene and occupational diseases	Zhonghua lao dong wei sheng zhi ye bing za zhi = Zhonghua laodong weisheng zhiyebing zazhi = Chinese journal of industrial hygiene and occupational diseases		Zhonghua lao dong wei sheng zhi ye bing za zhi = Zhonghua laodong weisheng zhiyebing zazhi = Chinese journal of industrial hygiene and occupational diseases	Zhonghua lao dong wei sheng zhi ye bing za zhi = Zhonghua laodong weisheng zhiyebing zazhi = Chinese journal of industrial hygiene and occupational diseases			10019391		0	1	1	1	0	1	0	0	0
Zygote	Zygote (Cambridge, England)		Zygote (Cambridge, England)	Zygote (Cambridge, England)		ZYGOTE	09671994	14698730	0	1	1	1	0	1	0	1	1	1.5
Acta Veterinaria Brasilica							19815484		0	0	1	0	0	0	0	0	0
Journal of Community Nursing							02634465		0	0	1	0	0	0	0	0	0
Pratique Medicale et Chirurgicale de l'Animal de Compagnie							07581882		0	0	1	0	0	0	0	0	0
Acta Crystallographica Section B: Structural Science		Acta Crystallographica Section B: Structural Science	Acta crystallographica. Section B, Structural science			ACTA CRYSTALLOGR B	01087681	16005740	0	0	1	0	1	1	0	1	0	2.175
Annual Review of Physiology	Annual review of physiology		Annual review of physiology			ANNU REV PHYSIOL	00664278	15451585	0	0	1	1	0	1	0	1	1	19.547
Prensa Medica Argentina			Prensa medica argentina				0032745X		0	0	1	0	0	1	0	0	0
Addiction Biology	Addiction biology		Addiction biology	Addiction Biology		ADDICT BIOL	13556215	13691600	0	1	1	1	0	1	0	1	1	5.914
American Journal of Physiology - Regulatory Integrative and Comparative Physiology	American journal of physiology. Regulatory, integrative and comparative physiology	American Journal of Physiology - Regulatory, Integrative and Comparative Physiology	American journal of physiology. Regulatory, integrative and comparative physiology	American Journal of Physiology - Regulatory Integrative and Comparative Physiology		AM J PHYSIOL-REG I	03636119	15221490	0	1	1	1	1	1	0	1	1	3.284
Annals of Cancer Research and Therapy				Annals of Cancer Research and Therapy			13446835		0	1	1	0	0	0	0	0	1
Cancer and Metastasis Reviews	Cancer metastasis reviews		Cancer metastasis reviews	Cancer and Metastasis Reviews		CANCER METAST REV	01677659	15737233	0	1	1	1	0	1	0	1	1	7.787
Chirality	Chirality		Chirality	Chirality		CHIRALITY	08990042	1520636X	0	1	1	1	0	1	0	1	1	1.894
Clinical Neurophysiology	Clinical neurophysiology : official journal of the International Federation of Clinical Neurophysiology		Clinical neurophysiology : official journal of the International Federation of Clinical Neurophysiology	Clinical Neurophysiology		CLIN NEUROPHYSIOL	13882457	18728952	0	1	1	1	0	1	0	1	1	3.144
Human Nature	Human nature (Hawthorne, N.Y.)		Human nature (Hawthorne, N.Y.)	Human nature (Hawthorne, N.Y.)		HUM NATURE-INT BIOS	10456767	19364776	0	1	1	1	0	1	0	1	1	1.814
Issues in Comprehensive Pediatric Nursing	Issues in comprehensive pediatric nursing		Issues in comprehensive pediatric nursing	Issues in comprehensive pediatric nursing			01460862	1521043X	0	1	1	1	0	1	0	0	1
Journal Africain du Cancer				Journal Africain du Cancer			19650817	19650825	0	1	1	0	0	0	0	0	1
Language, Speech, and Hearing Services in Schools	Language, speech, and hearing services in schools		Language, speech, and hearing services in schools	Language, speech, and hearing services in schools		LANG SPEECH HEAR SER	01611461	15589129	0	1	1	1	0	1	0	1	1	1.256
Leukemia and Lymphoma	Leukemia & lymphoma		Leukemia & lymphoma	Leukemia and Lymphoma		LEUKEMIA LYMPHOMA	10428194	10292403	0	1	1	1	0	1	0	1	1	2.301
Medicina e historia	Medicina e historia		Medicina e historia	Medicina e historia			03008169		0	1	1	1	0	1	0	0	0
Microvascular Research	Microvascular research		Microvascular research	Microvascular Research		MICROVASC RES	00262862	10959319	0	1	1	1	0	1	0	1	1	2.929
Nefrologia	Nefrología : publicación oficial de la Sociedad Española Nefrologia		Nefrologia : publicacion oficial de la Sociedad Espanola Nefrologia	Nefrología : publicación oficial de la Sociedad Española Nefrologia		NEFROLOGIA	02116995	19892284	0	1	1	1	0	1	0	1	0	1.274
Photosynthesis Research	Photosynthesis research		Photosynthesis research	Photosynthesis research		PHOTOSYNTH RES	01668595	15735079	0	1	1	1	0	1	0	1	1	3.15
Plant Physiology	Plant physiology	Plant Physiology	Plant physiology	Plant physiology		PLANT PHYSIOL	00320889	15322548	0	1	1	1	1	1	0	1	1	6.555
Psychoanalytic Psychology			Psychoanalytic psychology : the official journal of the Division of Psychoanalysis, American Psychological Association, Division 39	Psychoanalytic Psychology		PSYCHOANAL PSYCHOL	07369735	19391331	0	1	1	0	0	1	0	1	1	0.8
Radiation Physics and Chemistry			Radiation physics and chemistry (Oxford, England : 1993)	Radiation Physics and Chemistry		RADIAT PHYS CHEM	0969806X	18790895	0	1	1	0	0	1	0	1	1	1.375
Revmatologiia				Revmatologiia (Bulgaria)			13100505		0	1	1	0	0	0	0	0	0
Seminars in Vascular Surgery	Seminars in vascular surgery		Seminars in vascular surgery	Seminars in Vascular Surgery		SEMIN VASC SURG	08957967	15584518	0	1	1	1	0	1	0	1	1	1.015
European Physical Journal E	The European physical journal. E, Soft matter		The European physical journal. E, Soft matter	The European physical journal. E, Soft matter		EUR PHYS J E	12928941	1292895X	0	1	1	1	0	1	0	1	1	1.824
Virologie				Virologie		VIROLOGIE	12678694	19506961	0	1	1	0	0	0	0	1	0	0.169
World Heart Journal			World heart journal	World Heart Journal			15564002		0	1	1	0	0	1	0	0	1
Cancer Journal							07657846		0	0	1	0	0	0	0	0	0
Health Policy							07339143		0	0	1	0	0	0	0	0	0
Medicus							1330013X		0	0	1	0	0	0	0	0	0
Microbiology						MICROBIOLOGY+	00262617	00262617	0	0	1	0	0	0	0	1	0	0.649
Psychotropes							07159684	12452092	0	0	1	0	0	0	0	0	0
ACORN							14487535		0	0	1	0	0	0	0	0	0
Acta Microscopica							07984545		0	0	1	0	0	0	0	0	0
Actualites Pharmaceutiques Hospitalieres							17697344		0	0	1	0	0	0	0	0	0
Adiktologie							12133841		0	0	1	0	0	0	0	0	0
Adolescencia e Saude							16799941	21775281	0	0	1	0	0	0	0	0	0
Advances in Clinical and Experimental Medicine							1230025X		0	0	1	0	0	0	0	0	0
Advances in Mental Health							18387357	18374905	0	0	1	0	0	0	0	0	0
Advances in Mental Health and Intellectual Disabilities							20441282	20441290	0	0	1	0	0	0	0	0	0
Advances in Small Animal Medicine and Surgery							10417826		0	0	1	0	0	0	0	0	0
African Journal of Microbiology Research							19960808		0	0	1	0	0	0	0	0	0
Aide Soignante							11663413		0	0	1	0	0	0	0	0	0
AIMS Journal							02655004		0	0	1	0	0	0	0	0	0
Alternative and Complementary Therapies							10762809		0	0	1	0	0	0	0	0	0
ALTEX : Alternativen zu Tierexperimenten							09467785		0	0	1	0	0	0	0	0	0
American Journal of Dance Therapy							01463721	15733262	0	0	1	0	0	0	0	0	0
Andrologie							11662654		0	0	1	0	0	0	0	0	0
Animal Nutrition and Feed Technology						ANIM NUTR FEED TECHN	09722963	0974181X	0	0	1	0	0	0	0	1	0	0.355
Ankara Universitesi Veteriner Fakultesi Dergisi						ANKARA UNIV VET FAK	13000861	13000861	0	0	1	0	0	0	0	1	0	0.152
Annales Academiae Medicae Gedanensis							03034135		0	0	1	0	0	0	0	0	0
Annales Francaises d'Oto-Rhino-Laryngologie et de Pathologie Cervico-Faciale							18797261		0	0	1	0	0	0	0	0	0
Annals of Animal Science						ANN ANIM SCI	16423402	16423402	0	0	1	0	0	0	0	1	0	0.42
Annals of Fundeni Hospital							12243450		0	0	1	0	0	0	0	0	0
Annals of Pediatric Surgery							16874137		0	0	1	0	0	0	0	0	0
Annals of the Romanian Society for Cell Biology							15836258		0	0	1	0	0	0	0	0	0
Ansiedad y Estres							11347937		0	0	1	0	0	0	0	0	0
Anuario de Psicologia							00665126		0	0	1	0	0	0	0	0	0
Applied Biochemistry and Microbiology						APPL BIOCHEM MICRO+	00036838	16083024	0	0	1	0	0	0	0	1	0	0.689
Arbeitsmedizin Sozialmedizin Umweltmedizin							09446052		0	0	1	0	0	0	0	0	0
Archiv für Geflugelkunde						ARCH GEFLUGELKD	00039098	00039098	0	0	1	0	0	0	0	1	0	0.4
Archiv für Tierzucht						ARCH TIERZUCHT	00039438	00039438	0	0	1	0	0	0	0	1	0	0.463
Archives des Maladies Professionnelles et de l'Environnement						ARCH MAL PROF ENVIRO	17758785	17758785	0	0	1	0	0	0	0	1	0	0.222
Archives of Clinical Microbiology							19898436		0	0	1	0	0	0	0	0	0
Archives of Perinatal Medicine							15050580		0	0	1	0	0	0	0	0	0
Archivos Argentinos de Pediatria							00040487		0	0	1	0	0	0	0	0	0
Archivos de Alergia e Inmunologia Clinica							15159825		0	0	1	0	0	0	0	0	0
Archivos de Medicina del Deporte							02128799		0	0	1	0	0	0	0	0	0
Area Pediatrica							15910075		0	0	1	0	0	0	0	0	0
ArgoSpine News and Journal							19577729	19577737	0	0	1	0	0	0	0	0	0
Art Therapy							07421656		0	0	1	0	0	0	0	0	0
Arthroskopie							09337946		0	0	1	0	0	0	0	0	0
Artificial Life and Robotics							14335298		0	0	1	0	0	0	0	0	0
Asia Life Sciences						ASIA LIFE SCI	01173375	01173375	0	0	1	0	0	0	0	1	0	0.18
Asia-Pacific Journal of Molecular Biology and Biotechnology							01287451		0	0	1	0	0	0	0	0	0
Asian Journal of Animal and Veterinary Advances							16839919		0	0	1	0	0	0	0	0	0
Asian Journal of Cell Biology							18140068		0	0	1	0	0	0	0	0	0
Asian Journal of Gerontology and Geriatrics							18191576		0	0	1	0	0	0	0	0	0
Asian Journal of Ophthalmology							15602133		0	0	1	0	0	0	0	0	0
Asian Journal of Poultry Science							18193609		0	0	1	0	0	0	0	0	0
Asian Journal of WTO and International Health Law and Policy						ASIAN J WTO INT HEAL	18195164	18195164	0	0	1	0	0	0	0	1	0	0.419
Australian Journal of Acupuncture and Chinese Medicine							18339735		0	0	1	0	0	0	0	0	0
Australian Journal of Clinical and Experimental Hypnosis							01560417		0	0	1	0	0	0	0	0	0
Australian Journal of Clinical Hypnotherapy and Hypnosis							08100713		0	0	1	0	0	0	0	0	0
Australian Journal of Medical Herbalism							10338330		0	0	1	0	0	0	0	0	0
Australian Life Scientist							14489791		0	0	1	0	0	0	0	0	0
Australian Veterinary Practitioner						AUST VET PRACT	0310138X	0310138X	0	0	1	0	0	0	0	1	0	0.07
BANTAO Journal							13122517		0	0	1	0	0	0	0	0	0
Bariatric Nursing and Surgical Patient Care						BARIAT NURS SURG PAT	15571459	15571467	0	0	1	0	0	0	0	1	0	0.226
Basic and Applied Pathology							17559294		0	0	1	0	0	0	0	0	0
Best Practice and Research in Clinical Anaesthesiology							17533740		0	0	1	0	0	0	0	0	0
Bio Tech International							20322887		0	0	1	0	0	0	0	0	0
Biocatalysis and Agricultural Biotechnology							18788181		0	0	1	0	0	0	0	0	0
Biochemical and Cellular Archives							09725075		0	0	1	0	0	0	0	0	0
Biofutur						BIOFUTUR	02943506	02943506	0	0	1	0	0	0	0	1	0	0.051
Biological Engineering							19342799		0	0	1	0	0	0	0	0	0
Biologically Inspired Cognitive Architectures							2212683X		0	0	1	0	0	0	0	0	0
Biologicheskie Membrany						BIOL MEMBRANY	02334755	02334755	0	0	1	0	0	0	0	1	0	0.084
Biology and Fertility of Soils						BIOL FERT SOILS	01782762	14320789	0	0	1	0	0	0	0	1	0	2.505
Biology Bulletin						BIOL BULL+	10623590	16083059	0	0	1	0	0	0	0	1	0	0.251
BioPharm International						BIOPHARM INT	1542166X	1542166X	0	0	1	0	0	0	0	1	0	0.304
Biophysics (Japan)							13492942		0	0	1	0	0	0	0	0	0
BioSpektrum							09470867		0	0	1	0	0	0	0	0	0
Biotechnologia							08607796		0	0	1	0	0	0	0	0	0
Biotechnology and Biotechnological Equipment						BIOTECHNOL BIOTEC EQ	13102818	13102818	0	0	1	0	0	0	0	1	0	0.622
BioTechnology: An Indian Journal							09747435		0	0	1	0	0	0	0	0	0
Boletin de Malariologia y Salud Ambiental						B MALARIOL SALUD AMB	16904648	16904648	0	0	1	0	0	0	0	1	0	0.169
Brazilian Journal of Veterinary Pathology							19830246		0	0	1	0	0	0	0	0	0
British Journal of Health Care Management							13580574		0	0	1	0	0	0	0	0	0
British Journal of Learning Disabilities						BRIT J LEARN DISABIL	13544187	14683156	0	0	1	0	0	0	0	1	0	0.291
British Medical Journal							09598146		0	0	1	0	0	0	0	0	0
Buffalo Bulletin						BUFFALO BULL	01256726	01256726	0	0	1	0	0	0	0	1	0	0.048
Bulgarian Journal of Agricultural Science						BULG J AGRIC SCI	13100351	13100351	0	0	1	0	0	0	0	1	0	0.136
Bulletin of the European Association of Fish Pathologists						B EUR ASSOC FISH PAT	01080288	01080288	0	0	1	0	0	0	0	1	0	0.554
Bulletin of the Physical Fitness Research Institute							03899071		0	0	1	0	0	0	0	0	0
Bulletin of the Veterinary Institute in Pulawy						B VET I PULAWY	00424870	00424870	0	0	1	0	0	0	0	1	0	0.377
CAB Reviews: Perspectives in Agriculture, Veterinary Science, Nutrition and Natural Resources							17498848		0	0	1	0	0	0	0	0	0
Cahiers de Psychologie Clinique							1370074X	17821401	0	0	1	0	0	0	0	0	0
Canadian Journal of Animal Science						CAN J ANIM SCI	00083984	00083984	0	0	1	0	0	0	0	1	0	0.956
Cardiocore							1889898X		0	0	1	0	0	0	0	0	0
Cardiovascular Therapy and Prevention (Russian Federation)						CARDIOVASC THER PREV	17288800	17288800	0	0	1	0	0	0	0	1	0	0.004
Caryologia						CARYOLOGIA	00087114	00087114	0	0	1	0	0	0	0	1	0	0.632
Cellular Transplantation and Tissue Engineering							1815445X		0	0	1	0	0	0	0	0	0
Cereal Research Communications						CEREAL RES COMMUN	01333720	01333720	0	0	1	0	0	0	0	1	0	0.549
Champ Psychosomatique							12665371	19618638	0	0	1	0	0	0	0	0	0
Chang Gung Medical Journal							02558270		0	0	1	0	0	0	0	0	0
Chemical Papers						CHEM PAP	03666352	03666352	0	0	1	0	0	0	0	1	0	0.879
Chemical Speciation and Bioavailability						CHEM SPEC BIOAVAILAB	09542299	09542299	0	0	1	0	0	0	0	1	0	0.65
Chemotherapie Journal							09406735		0	0	1	0	0	0	0	0	0
Chiang Mai Journal of Science						CHIANG MAI J SCI	01252526	01252526	0	0	1	0	0	0	0	1	0	0.516
Child Abuse Review						CHILD ABUSE REV	09529136	09529136	0	0	1	0	0	0	0	1	0	0.698
Child Care in Practice							13575279		0	0	1	0	0	0	0	0	0
Chinese Journal of Applied and Environmental Biology							1006687X		0	0	1	0	0	0	0	0	0
Chinese Journal of Chemical Engineering						CHINESE J CHEM ENG	10049541	10049541	0	0	1	0	0	0	0	1	0	0.92
Chinese Journal of Clinical Nutrition							10085882		0	0	1	0	0	0	0	0	0
Chinese Journal of Emergency Medicine							16710282		0	0	1	0	0	0	0	0	0
Chinese Journal of Rehabilitation Medicine							10011242		0	0	1	0	0	0	0	0	0
Chiropractic Journal of Australia							10360913		0	0	1	0	0	0	0	0	0
Chirurgia del Piede							03920771		0	0	1	0	0	0	0	0	0
Chirurgia Polska							15075524	16443349	0	0	1	0	0	0	0	0	0
Chirurgische Praxis							00094846		0	0	1	0	0	0	0	0	0
Clinical and Experimental Allergy Reviews							14729725		0	0	1	0	0	0	0	0	0
Clinical and Refractive Optometry							17054850		0	0	1	0	0	0	0	0	0
Clinical and Surgical Ophthalmology							17054842		0	0	1	0	0	0	0	0	0
Clinical Chiropractic							14792354		0	0	1	0	0	0	0	0	0
Clinical Neuropsychologist							09201637		0	0	1	0	0	0	0	0	0
Clinical Simulation in Nursing							18761399		0	0	1	0	0	0	0	0	0
Cliniques Mediterraneennes							07627491	17762790	0	0	1	0	0	0	0	0	0
CME							10166742		0	0	1	0	0	0	0	0	0
Colon and Rectum							19516371	1951638X	0	0	1	0	0	0	0	0	0
Comparative Parasitology						COMP PARASITOL	15252647	15252647	0	0	1	0	0	0	0	1	0	0.876
Compendium (Yardley, PA)							01931903		0	0	1	0	0	0	0	0	0
Constructivist Foundations							1782348X		0	0	1	0	0	0	0	0	0
Continuing Education in Anaesthesia, Critical Care and Pain							17431816	17431824	0	0	1	0	0	0	0	0	0
Correspondances en MHND							21009619		0	0	1	0	0	0	0	0	0
Cosmetic Dermatology							10413766		0	0	1	0	0	0	0	0	0
CPD Anaesthesia							14662922		0	0	1	0	0	0	0	0	0
Crystallography Reviews						CRYSTALLOGR REV	0889311X	0889311X	0	0	1	0	0	0	0	1	0	2.316
Current Sexual Health Reports							15483584	15483592	0	0	1	0	0	0	0	0	0
Deafness and Education International							14643154		0	0	1	0	0	0	0	0	0
Dermatologia Cosmetica, Medica y Quirurgica							16654390		0	0	1	0	0	0	0	0	0
Devenir							10158154		0	0	1	0	0	0	0	0	0
Diabetes Primary Care							14668955		0	0	1	0	0	0	0	0	0
Diabetes, Obesity and Metabolism, Supplement							14657740		0	0	1	0	0	0	0	0	0
Digest Journal of Nanomaterials and Biostructures						DIG J NANOMATER BIOS	18423582	18423582	0	0	1	0	0	0	0	1	0	1.092
Digital Investigation						DIGIT INVEST	17422876	17422876	0	0	1	0	0	0	0	1	0	0.63
Droit, Deontologie et Soin							16296583		0	0	1	0	0	0	0	0	0
Drugs and Alcohol Today							17459265		0	0	1	0	0	0	0	0	0
Egyptian Journal of Histology							11100559		0	0	1	0	0	0	0	0	0
Egyptian Liver Journal							20906218	20906226	0	0	1	0	0	0	0	0	0
EJVES Extra							15333167		0	0	1	0	0	0	0	0	0
Emergencias						EMERGENCIAS	11376821	11376821	0	0	1	0	0	0	0	1	0	2.578
EMS Insider							10814507		0	0	1	0	0	0	0	0	0
Endocrine							0969711X		0	0	1	0	0	0	0	0	0
Endoskopie							12111074		0	0	1	0	0	0	0	0	0
Endoskopie Heute						ENDOSKOPIE HEUTE	0933811X	14392577	0	0	1	0	0	0	0	1	0	0.133
Environmental Quality Management							10881913		0	0	1	0	0	0	0	0	0
Environmental Research Letters							17489318		0	0	1	0	0	0	0	0	0
Epidemiologie et Sante Animale							07542186		0	0	1	0	0	0	0	0	0
Equine Veterinary Education						EQUINE VET EDUC	09577734	09577734	0	0	1	0	0	0	0	1	0	0.697
Ergotherapie und Rehabilitation							09428623		0	0	1	0	0	0	0	0	0
Ernahrung							02501554		0	0	1	0	0	0	0	0	0
Ernahrungs Umschau							03402371		0	0	1	0	0	0	0	0	0
Essaim							1287258X	17762839	0	0	1	0	0	0	0	0	0
Ethique et Sante							17654629		0	0	1	0	0	0	0	0	0
[truncated: 44,145 more rows]
